# Supplementary material for: Intrathecally Expanding B Cell Clones in Herpes Simplex Encephalitis: A Case Report
Source: Springer Nature journal article supplement (doi:10.1007/s40120-022-00330-2), 2022-02-06
Supplement: MOESM1 [file 20104764]

# **Intrathecally Expanding B Cell Clones in Herpes Simplex Encephalitis- A Case Report**

## **Authors**

Shila P. Coronel-Castello<sup>1\*</sup>, Gildas Lepennetier<sup>1\*</sup>, Jolien Diddens<sup>1</sup>, Verena Friedrich<sup>1</sup>,  
Monika Pfaller<sup>1</sup>, Bernhard Hemmer<sup>1,2</sup>, Klaus Lehmann-Horn<sup>1</sup>

<sup>1</sup>Department of Neurology, School of Medicine, Technical University of Munich,  
Munich, Germany

<sup>2</sup>Munich Cluster of Systems Neurology (SyNergy), Germany

\*These authors contributed equally to this work

**Corresponding author:** Klaus Lehmann-Horn, MD, Department of Neurology, School  
of Medicine, Technical University of Munich, Munich, Germany  
klaus.lehmann-horn@tum.de

Full V(D)J sequence of expanded clones

| clone                | clonal group ID | ratio | time | origin tissue | celltype | frequency (cell count) | Isotype | V gene              | D gene   | J gene      | C gene      | total cells per time point | total cells per time point per clone | cell percent per time point |
|----------------------|-----------------|-------|------|---------------|----------|------------------------|---------|---------------------|----------|-------------|-------------|----------------------------|--------------------------------------|-----------------------------|
| 168_IGHV1-18_IGHJ4   | 168             | 11,8  | t1   | CSF           | BCR      | 1                      | IGH;IGK | IGHV1-18;IGKV3-20   | IGHD5-18 | IGHJ4;IGKJ2 | IGHG4;IGKC  | 1964                       | 1                                    | 0,1                         |
| 168_IGHV1-18_IGHJ4   | 168             | 11,8  | t2   | CSF           | BCR      | 1                      | IGH;IGK | IGHV1-18;IGKV3-20   | IGHD5-18 | IGHJ4;IGKJ2 | IGHG4;IGKC  | 333                        | 2                                    | 0,6                         |
| 168_IGHV1-18_IGHJ4   | 168             | 11,8  | t2   | CSF           | BCR      | 1                      | IGH;IGK | IGHV1-18;IGKV3-20   | IGHD5-18 | IGHJ4;IGKJ2 | IGHG4;IGKC  | 333                        | 2                                    | 0,6                         |
| 191_IGHV1-2_IGHJ2    | 191             | 11,8  | t1   | CSF           | BCR      | 1                      | IGH;IGK | IGHV1-2;IGKV3-20    | IGHD5-24 | IGHJ2;IGKJ1 | IGHG2;IGKC  | 1964                       | 1                                    | 0,1                         |
| 191_IGHV1-2_IGHJ2    | 191             | 11,8  | t2   | CSF           | BCR      | 1                      | IGH;IGK | IGHV1-2;IGKV3-20    | IGHD5-18 | IGHJ2;IGKJ1 | IGHG2;IGKC  | 333                        | 2                                    | 0,6                         |
| 191_IGHV1-2_IGHJ2    | 191             | 11,8  | t2   | CSF           | BCR      | 1                      | IGH;IGK | IGHV1-2;IGKV3-20    | IGHD5-18 | IGHJ2;IGKJ1 | IGHG2;IGKC  | 333                        | 2                                    | 0,6                         |
| 28_IGHV3-43_IGHJ3    | 28              | 11,8  | t1   | CSF           | BCR      | 1                      | IGH;IGK | IGHV3-43;IGKV4-1    | IGHD4-17 | IGHJ3;IGKJ4 | IGHG1;IGKC  | 1964                       | 1                                    | 0,1                         |
| 28_IGHV3-43_IGHJ3    | 28              | 11,8  | t2   | CSF           | BCR      | 2                      | IGH;IGK | IGHV3-43;IGKV4-1    | IGHD4-17 | IGHJ3;IGKJ4 | IGHG1;IGKC  | 333                        | 2                                    | 0,6                         |
| 4_IGHV4-59_IGHJ4     | 4               | 11,8  | t1   | CSF           | BCR      | 2                      | IGH;IGK | IGHV4-59;IGKV2-28   | IGHD4-23 | IGHJ4;IGKJ3 | IGHG1;IGKC  | 1964                       | 2                                    | 0,1                         |
| 4_IGHV4-59_IGHJ4     | 4               | 11,8  | t2   | CSF           | BCR      | 3                      | IGH;IGK | IGHV4-59;IGKV2-28   | IGHD4-23 | IGHJ4;IGKJ3 | IGHG1;IGKC  | 333                        | 4                                    | 1,2                         |
| 4_IGHV4-59_IGHJ4     | 4               | 11,8  | t2   | CSF           | BCR      | 1                      | IGH;IGK | IGHV4-59;IGKV2-28   | IGHD4-23 | IGHJ4;IGKJ3 | IGHG1;IGKC  | 333                        | 4                                    | 1,2                         |
| 46_IGHV1-69D_IGHJ6   | 46              | 11,8  | t1   | CSF           | BCR      | 1                      | IGH;IGK | IGHV1-69D;IGKV1-5   | IGHD6-6  | IGHJ6;IGKJ2 | IGHG1;IGKC  | 1964                       | 1                                    | 0,1                         |
| 46_IGHV1-69D_IGHJ6   | 46              | 11,8  | t2   | CSF           | BCR      | 1                      | IGH;IGK | IGHV1-69D;IGKV1-5   | IGHD6-6  | IGHJ6;IGKJ2 | IGHG1;IGKC  | 333                        | 2                                    | 0,6                         |
| 46_IGHV1-69D_IGHJ6   | 46              | 11,8  | t2   | CSF           | BCR      | 1                      | IGH;IGK | IGHV1-69D;IGKV1-5   | IGHD6-6  | IGHJ6;IGKJ2 | IGHG1;IGKC  | 333                        | 2                                    | 0,6                         |
| 51_IGHV1-2_IGHJ5     | 51              | 11,8  | t1   | CSF           | BCR      | 1                      | IGH;IGK | IGHV1-2;IGKV3-15    | IGHD3-10 | IGHJ5;IGKJ1 | IGHG1;IGKC  | 1964                       | 1                                    | 0,1                         |
| 51_IGHV1-2_IGHJ5     | 51              | 11,8  | t2   | CSF           | BCR      | 1                      | IGH;IGK | IGHV1-2;IGKV3-15    | IGHD3-10 | IGHJ5;IGKJ1 | IGHG1;IGKC  | 333                        | 2                                    | 0,6                         |
| 51_IGHV1-2_IGHJ5     | 51              | 11,8  | t2   | CSF           | BCR      | 1                      | IGH;IGK | IGHV1-2;IGKV3-15    | IGHD3-10 | IGHJ5;IGKJ1 | IGHG1;IGKC  | 333                        | 2                                    | 0,6                         |
| 14_IGHV4-39_IGHJ4    | 14              | 8,8   | t1   | CSF           | BCR      | 2                      | IGH;IGK | IGHV4-39;IGKV4-1    | IGHD2-15 | IGHJ4;IGKJ4 | IGHG1;IGKC  | 1964                       | 2                                    | 0,1                         |
| 14_IGHV4-39_IGHJ4    | 14              | 8,8   | t2   | CSF           | BCR      | 2                      | IGH;IGK | IGHV4-39;IGKV4-1    | IGHD2-15 | IGHJ4;IGKJ4 | IGHG1;IGKC  | 333                        | 3                                    | 0,9                         |
| 14_IGHV4-39_IGHJ4    | 14              | 8,8   | t2   | CSF           | BCR      | 1                      | IGH;IGK | IGHV4-39;IGKV4-1    | IGHD2-15 | IGHJ4;IGKJ4 | IGHG1;IGKC  | 333                        | 3                                    | 0,9                         |
| 6_IGHV1-18_IGHJ6     | 6               | 8,8   | t1   | CSF           | BCR      | 1                      | IGH;IGL | IGHV1-18;IGLV2-8    | IGHD5-12 | IGHJ6;IGLJ2 | IGHG1;IGLC2 | 1964                       | 2                                    | 0,1                         |
| 6_IGHV1-18_IGHJ6     | 6               | 8,8   | t1   | CSF           | BCR      | 1                      | IGH;IGL | IGHV1-18;IGLV2-8    | IGHD2-21 | IGHJ6;IGLJ2 | IGHG1;IGLC2 | 1964                       | 2                                    | 0,1                         |
| 6_IGHV1-18_IGHJ6     | 6               | 8,8   | t2   | CSF           | BCR      | 3                      | IGH;IGL | IGHV1-18;IGLV2-8    | IGHD1-1  | IGHJ6;IGLJ2 | IGHG1;IGLC2 | 333                        | 3                                    | 0,9                         |
| 8_IGHV5-51_IGHJ4     | 8               | 8,8   | t1   | CSF           | BCR      | 1                      | IGH;IGL | IGHV5-51;IGLV3-25   | IGHD3-10 | IGHJ4;IGLJ1 | IGHG1;IGLC1 | 1964                       | 2                                    | 0,1                         |
| 8_IGHV5-51_IGHJ4     | 8               | 8,8   | t1   | CSF           | BCR      | 1                      | IGH;IGL | IGHV5-51;IGLV3-25   | IGHD3-10 | IGHJ4;IGLJ1 | IGHG1;IGLC1 | 1964                       | 2                                    | 0,1                         |
| 8_IGHV5-51_IGHJ4     | 8               | 8,8   | t2   | CSF           | BCR      | 3                      | IGH;IGL | IGHV5-51;IGLV3-25   | IGHD3-10 | IGHJ4;IGLJ1 | IGHG1;IGLC1 | 333                        | 3                                    | 0,9                         |
| 109_IGHV2-5_IGHJ3    | 109             | 5,9   | t1   | CSF           | BCR      | 1                      | IGH;IGL | IGHV2-5;IGLV2-23    | IGHD3-22 | IGHJ3;IGLJ1 | IGHG1;IGLC1 | 1964                       | 1                                    | 0,1                         |
| 109_IGHV2-5_IGHJ3    | 109             | 5,9   | t2   | CSF           | BCR      | 1                      | IGH;IGL | IGHV2-5;IGLV2-23    | IGHD3-22 | IGHJ3;IGLJ1 | IGHG1;IGLC1 | 333                        | 1                                    | 0,3                         |
| 11_IGHV1-69D_IGHJ5   | 11              | 5,9   | t1   | CSF           | BCR      | 2                      | IGH;IGK | IGHV1-69D;IGKV1D-39 | IGHD6-19 | IGHJ5;IGKJ2 | IGHG1;IGKC  | 1964                       | 2                                    | 0,1                         |
| 11_IGHV1-69D_IGHJ5   | 11              | 5,9   | t2   | CSF           | BCR      | 2                      | IGH;IGK | IGHV1-69D;IGKV1D-39 | IGHD6-19 | IGHJ5;IGKJ2 | IGHG1;IGKC  | 333                        | 2                                    | 0,6                         |
| 112_IGHV1-69D_IGHJ4  | 112             | 5,9   | t1   | CSF           | BCR      | 1                      | IGH;IGK | IGHV1-69D;IGKV3-15  | IGHD3-10 | IGHJ4;IGKJ3 | IGHG1;IGKC  | 1964                       | 1                                    | 0,1                         |
| 112_IGHV1-69D_IGHJ4  | 112             | 5,9   | t2   | CSF           | BCR      | 1                      | IGH;IGK | IGHV1-69D;IGKV3-15  | IGHD2-21 | IGHJ4;IGKJ3 | IGHG1;IGKC  | 333                        | 1                                    | 0,3                         |
| 116_IGHV3-53_IGHJ3   | 116             | 5,9   | t1   | CSF           | BCR      | 1                      | IGH;IGK | IGHV3-53;IGKV3-11   | IGHD3-10 | IGHJ3;IGKJ2 | IGHG1;IGKC  | 1964                       | 1                                    | 0,1                         |
| 116_IGHV3-53_IGHJ3   | 116             | 5,9   | t2   | CSF           | BCR      | 1                      | IGH;IGK | IGHV3-53;IGKV3-11   | IGHD3-10 | IGHJ3;IGKJ2 | IGHG1;IGKC  | 333                        | 1                                    | 0,3                         |
| 117_IGHV4-61_IGHJ4   | 117             | 5,9   | t1   | CSF           | BCR      | 1                      | IGH;IGL | IGHV4-61;IGLV2-23   | IGHD6-19 | IGHJ4;IGLJ2 | IGHG1;IGLC2 | 1964                       | 1                                    | 0,1                         |
| 117_IGHV4-61_IGHJ4   | 117             | 5,9   | t2   | CSF           | BCR      | 1                      | IGH;IGL | IGHV4-61;IGLV2-23   | IGHD6-19 | IGHJ4;IGLJ2 | IGHG1;IGLC2 | 333                        | 1                                    | 0,3                         |
| 118_IGHV4-61_IGHJ4   | 118             | 5,9   | t1   | CSF           | BCR      | 1                      | IGH;IGL | IGHV4-61;IGLV1-51   | IGHD3-16 | IGHJ4;IGLJ2 | IGHG1;IGLC2 | 1964                       | 1                                    | 0,1                         |
| 118_IGHV4-61_IGHJ4   | 118             | 5,9   | t2   | CSF           | BCR      | 1                      | IGH;IGL | IGHV4-61;IGLV1-51   | IGHD3-16 | IGHJ4;IGLJ2 | IGHG1;IGLC2 | 333                        | 1                                    | 0,3                         |
| 135_IGHV4-61_IGHJ6   | 135             | 5,9   | t1   | CSF           | BCR      | 1                      | IGH;IGK | IGHV4-61;IGKV2D-28  | IGHD6-25 | IGHJ6;IGKJ2 | IGHG1;IGKC  | 1964                       | 1                                    | 0,1                         |
| 135_IGHV4-61_IGHJ6   | 135             | 5,9   | t2   | CSF           | BCR      | 1                      | IGH;IGK | IGHV4-61;IGKV2-28   | IGHD6-25 | IGHJ6;IGKJ2 | IGHG1;IGKC  | 333                        | 1                                    | 0,3                         |
| 136_IGHV3-21_IGHJ4   | 136             | 5,9   | t1   | CSF           | BCR      | 1                      | IGH;IGK | IGHV3-21;IGKV1-9    | IGHD6-13 | IGHJ4;IGKJ4 | IGHG1;IGKC  | 1964                       | 1                                    | 0,1                         |
| 136_IGHV3-21_IGHJ4   | 136             | 5,9   | t2   | CSF           | BCR      | 1                      | IGH;IGK | IGHV3-21;IGKV1-9    | IGHD6-13 | IGHJ4;IGKJ4 | IGHG1;IGKC  | 333                        | 1                                    | 0,3                         |
| 140_IGHV3-23_IGHJ4   | 140             | 5,9   | t1   | CSF           | BCR      | 1                      | IGH;IGL | IGHV3-23;IGLV2-14   | IGHD3-3  | IGHJ4;IGLJ1 | IGHG1;IGLC1 | 1964                       | 1                                    | 0,1                         |
| 140_IGHV3-23_IGHJ4   | 140             | 5,9   | t2   | CSF           | BCR      | 1                      | IGH;IGL | IGHV3-23;IGLV2-14   | IGHD3-3  | IGHJ4;IGLJ1 | IGHG1;IGLC1 | 333                        | 1                                    | 0,3                         |
| 142_IGHV4-30-2_IGHJ4 | 142             | 5,9   | t1   | CSF           | BCR      | 1                      | IGH;IGL | IGHV4-30-2;IGLV1-51 | IGHD3-9  | IGHJ4;IGLJ2 | IGHG1;IGLC2 | 1964                       | 1                                    | 0,1                         |
| 142_IGHV4-30-2_IGHJ4 | 142             | 5,9   | t2   | CSF           | BCR      | 1                      | IGH;IGL | IGHV4-30-2;IGLV1-51 | IGHD3-9  | IGHJ4;IGLJ2 | IGHG1;IGLC2 | 333                        | 1                                    | 0,3                         |
| 146_IGHV3-30_IGHJ2   | 146             | 5,9   | t1   | CSF           | BCR      | 1                      | IGH;IGK | IGHV3-30;IGKV3-11   | IGHD3-16 | IGHJ2;IGKJ5 | IGHG1;IGKC  | 1964                       | 1                                    | 0,1                         |
| 146_IGHV3-30_IGHJ2   | 146             | 5,9   | t2   | CSF           | BCR      | 1                      | IGH;IGK | IGHV3-30;IGKV3-11   | IGHD3-16 | IGHJ2;IGKJ5 | IGHG1;IGKC  | 333                        | 1                                    | 0,3                         |
| 149_IGHV3-11_IGHJ4   | 149             | 5,9   | t1   | CSF           | BCR      | 1                      | IGH;IGL | IGHV3-11;IGLV1-40   | IGHD3-22 | IGHJ4;IGLJ1 | IGHA1;IGLC1 | 1964                       | 1                                    | 0,1                         |
| 149_IGHV3-11_IGHJ4   | 149             | 5,9   | t2   | CSF           | BCR      | 1                      | IGH;IGL | IGHV3-11;IGLV1-40   | IGHD3-10 | IGHJ4;IGLJ1 | IGHA1;IGLC1 | 333                        | 1                                    | 0,3                         |
| 15_IGHV5-10-1_IGHJ4  | 15              | 5,9   | t1   | CSF           | BCR      | 2                      | IGH;IGL | IGHV5-10-1;IGLV1-44 | IGHD2-15 | IGHJ4;IGLJ2 | IGHG1;IGLC2 | 1964                       | 2                                    | 0,1                         |
| 15_IGHV5-10-1_IGHJ4  | 15              | 5,9   | t2   | CSF           | BCR      | 2                      | IGH;IGL | IGHV5-10-1;IGLV1-44 | IGHD2-15 | IGHJ4;IGLJ2 | IGHG1;IGLC2 | 333                        | 2                                    | 0,6                         |
| 158_IGHV1-18_IGHJ4   | 158             | 5,9   | t1   | CSF           | BCR      | 1                      | IGH;IGL | IGHV1-18;IGLV2-23   | IGHD3-3  | IGHJ4;IGLJ2 | IGHG1;IGLC2 | 1964                       | 1                                    | 0,1                         |
| 158_IGHV1-18_IGHJ4   | 158             | 5,9   | t2   | CSF           | BCR      | 1                      | IGH;IGL | IGHV1-18;IGLV2-23   | IGHD3-3  | IGHJ4;IGLJ2 | IGHG1;IGLC2 | 333                        | 1                                    | 0,3                         |
| 170_IGHV1-8_IGHJ5    | 170             | 5,9   | t1   | CSF           | BCR      | 1                      | IGH;IGK | IGHV1-8;IGKV1D-17   | IGHD4-23 | IGHJ5;IGKJ4 | IGHG1;IGKC  | 1964                       | 2                                    | 0,1                         |
| 170_IGHV1-8_IGHJ5    | 170             | 5,9   | t2   | CSF           | BCR      | 1                      | IGH;IGK | IGHV1-8;IGKV1D-17   | IGHD4-23 | IGHJ5;IGKJ4 | IGHG1;IGKC  | 333                        | 2                                    | 0,6                         |
| 170_IGHV1-8_IGHJ5    | 170             | 5,9   | t2   | CSF           | BCR      | 1                      | IGH;IGK | IGHV1-8;IGKV1D-17   | IGHD4-23 | IGHJ5;IGKJ4 | IGHG1;IGKC  | 333                        | 2                                    | 0,6                         |

|                     |     |     |    |     |     |   |         |                      |          |             |             |      |   |     |
|---------------------|-----|-----|----|-----|-----|---|---------|----------------------|----------|-------------|-------------|------|---|-----|
| 176_IGHV3-33_IGHJ5  | 176 | 5,9 | t1 | CSF | BCR | 1 | IGH;IGK | IGHV3-33;IGKV1D-17   | IGHD6-13 | IGHJ5;IGKJ1 | IGHG1;IGKC  | 1964 | 1 | 0,1 |
| 176_IGHV3-33_IGHJ5  | 176 | 5,9 | t2 | CSF | BCR | 1 | IGH;IGK | IGHV3-33;IGKV1D-17   | IGHD6-13 | IGHJ5;IGKJ1 | IGHG1;IGKC  | 333  | 1 | 0,3 |
| 18_IGHV1-8_IGHJ4    | 18  | 5,9 | t1 | CSF | BCR | 2 | IGH;IGK | IGHV1-8;IGKV3-15     | IGHD3-10 | IGHJ4;IGKJ1 | IGHG1;IGKC  | 1964 | 2 | 0,1 |
| 18_IGHV1-8_IGHJ4    | 18  | 5,9 | t2 | CSF | BCR | 2 | IGH;IGK | IGHV1-8;IGKV3-15     | IGHD3-10 | IGHJ4;IGKJ1 | IGHG1;IGKC  | 333  | 2 | 0,6 |
| 182_IGHV3-48_IGHJ4  | 182 | 5,9 | t1 | CSF | BCR | 1 | IGH;IGL | IGHV3-48;IGLV4-69    | IGHD5-18 | IGHJ4;IGLJ2 | IGHM;IGLC2  | 1964 | 1 | 0,1 |
| 182_IGHV3-48_IGHJ4  | 182 | 5,9 | t2 | CSF | BCR | 1 | IGH;IGL | IGHV3-48;IGLV4-69    | IGHD5-18 | IGHJ4;IGLJ2 | IGHG1;IGLC2 | 333  | 1 | 0,3 |
| 183_IGHV3-30_IGHJ4  | 183 | 5,9 | t1 | CSF | BCR | 1 | IGH;IGK | IGHV3-30;IGKV1-9     | IGHD3-10 | IGHJ4;IGKJ3 | IGHG1;IGKC  | 1964 | 1 | 0,1 |
| 183_IGHV3-30_IGHJ4  | 183 | 5,9 | t2 | CSF | BCR | 1 | IGH;IGK | IGHV3-30;IGKV1-9     | IGHD3-10 | IGHJ4;IGKJ3 | IGHG1;IGKC  | 333  | 1 | 0,3 |
| 195_IGHV3-23_IGHJ4  | 195 | 5,9 | t1 | CSF | BCR | 1 | IGH;IGK | IGHV3-23;IGKV3-20    | IGHD6-19 | IGHJ4;IGKJ3 | IGKC;None   | 1964 | 1 | 0,1 |
| 195_IGHV3-23_IGHJ4  | 195 | 5,9 | t2 | CSF | BCR | 1 | IGH;IGK | IGHV3-23;IGKV3-20    | IGHD6-19 | IGHJ4;IGKJ3 | IGHG2;IGKC  | 333  | 1 | 0,3 |
| 198_IGHV3-23_IGHJ4  | 198 | 5,9 | t1 | CSF | BCR | 1 | IGH;IGK | IGHV3-23;IGKV4-1     | IGHD3-3  | IGHJ4;IGKJ2 | IGHG1;IGKC  | 1964 | 2 | 0,1 |
| 198_IGHV3-23_IGHJ4  | 198 | 5,9 | t1 | CSF | BCR | 1 | IGH;IGK | IGHV3-23;IGKV4-1     | IGHD3-3  | IGHJ4;IGKJ2 | IGHG1;IGKC  | 1964 | 2 | 0,1 |
| 198_IGHV3-23_IGHJ4  | 198 | 5,9 | t2 | CSF | BCR | 1 | IGH;IGK | IGHV3-23;IGKV4-1     | IGHD3-3  | IGHJ4;IGKJ2 | IGHG1;IGKC  | 333  | 2 | 0,6 |
| 198_IGHV3-23_IGHJ4  | 198 | 5,9 | t2 | CSF | BCR | 1 | IGH;IGK | IGHV3-23;IGKV4-1     | IGHD3-3  | IGHJ4;IGKJ2 | IGHG1;IGKC  | 333  | 2 | 0,6 |
| 199_IGHV1-46_IGHJ5  | 199 | 5,9 | t1 | CSF | BCR | 1 | IGH;IGK | IGHV1-46;IGKV3-15    | IGHD2-21 | IGHJ5;IGKJ2 | IGHG1;IGKC  | 1964 | 1 | 0,1 |
| 199_IGHV1-46_IGHJ5  | 199 | 5,9 | t2 | CSF | BCR | 1 | IGH;IGK | IGHV1-46;IGKV3-15    | IGHD2-21 | IGHJ5;IGKJ2 | IGHG1;IGKC  | 333  | 1 | 0,3 |
| 201_IGHV4-59_IGHJ5  | 201 | 5,9 | t1 | CSF | BCR | 1 | IGH;IGK | IGHV4-59;IGKV4-1     | IGHD6-19 | IGHJ5;IGKJ3 | IGKC;None   | 1964 | 1 | 0,1 |
| 201_IGHV4-59_IGHJ5  | 201 | 5,9 | t2 | CSF | BCR | 1 | IGH;IGK | IGHV4-59;IGKV4-1     | IGHD6-19 | IGHJ5;IGKJ3 | IGHG1;IGKC  | 333  | 1 | 0,3 |
| 202_IGHV1-18_IGHJ4  | 202 | 5,9 | t1 | CSF | BCR | 1 | IGH;IGK | IGHV1-18;IGKV1-16    | IGHD3-10 | IGHJ4;IGKJ2 | IGHG1;IGKC  | 1964 | 1 | 0,1 |
| 202_IGHV1-18_IGHJ4  | 202 | 5,9 | t2 | CSF | BCR | 1 | IGH;IGK | IGHV1-18;IGKV1-16    | IGHD3-10 | IGHJ4;IGKJ2 | IGHG1;IGKC  | 333  | 1 | 0,3 |
| 210_IGHV1-46_IGHJ6  | 210 | 5,9 | t1 | CSF | BCR | 1 | IGH;IGK | IGHV1-46;IGKV1-5     | IGHD5-24 | IGHJ6;IGKJ1 | IGHG1;IGKC  | 1964 | 1 | 0,1 |
| 210_IGHV1-46_IGHJ6  | 210 | 5,9 | t2 | CSF | BCR | 1 | IGH;IGK | IGHV1-46;IGKV1-5     | IGHD5-24 | IGHJ6;IGKJ1 | IGHG1;IGKC  | 333  | 1 | 0,3 |
| 212_IGHV1-2_IGHJ4   | 212 | 5,9 | t1 | CSF | BCR | 1 | IGH;IGK | IGHV1-2;IGKV3-15     | IGHD3-10 | IGHJ4;IGKJ1 | IGHG1;IGKC  | 1964 | 1 | 0,1 |
| 212_IGHV1-2_IGHJ4   | 212 | 5,9 | t2 | CSF | BCR | 1 | IGH;IGK | IGHV1-2;IGKV3-15     | IGHD3-10 | IGHJ4;IGKJ1 | IGHG1;IGKC  | 333  | 1 | 0,3 |
| 212_IGHV1-8_IGHJ1   | 212 | 5,9 | t1 | CSF | BCR | 1 | IGH;IGK | IGHV1-8;IGKV3-15     | IGHD3-10 | IGHJ1;IGKJ1 | IGHG1;IGKC  | 1964 | 1 | 0,1 |
| 212_IGHV1-8_IGHJ1   | 212 | 5,9 | t2 | CSF | BCR | 1 | IGH;IGK | IGHV1-8;IGKV3-15     | IGHD1-1  | IGHJ1;IGKJ1 | IGHG1;IGKC  | 333  | 1 | 0,3 |
| 214_IGHV4-4_IGHJ1   | 214 | 5,9 | t1 | CSF | BCR | 1 | IGH;IGK | IGHV4-4;IGKV3-15     | IGHD4-11 | IGHJ1;IGKJ1 | IGHG1;IGKC  | 1964 | 1 | 0,1 |
| 214_IGHV4-4_IGHJ1   | 214 | 5,9 | t2 | CSF | BCR | 1 | IGH;IGK | IGHV4-4;IGKV3-15     | IGHD4-11 | IGHJ1;IGKJ1 | IGHG1;IGKC  | 333  | 1 | 0,3 |
| 218_IGHV4-39_IGHJ4  | 218 | 5,9 | t1 | CSF | BCR | 1 | IGH;IGK | IGHV4-39;IGKV3-20    | IGHD3-10 | IGHJ4;IGKJ4 | IGHA1;IGKC  | 1964 | 1 | 0,1 |
| 218_IGHV4-39_IGHJ4  | 218 | 5,9 | t2 | CSF | BCR | 1 | IGH;IGK | IGHV4-39;IGKV3-20    | IGHD3-10 | IGHJ4;IGKJ4 | IGHA1;IGKC  | 333  | 1 | 0,3 |
| 221_IGHV3-33_IGHJ4  | 221 | 5,9 | t1 | CSF | BCR | 1 | IGH;IGL | IGHV3-33;IGLV1-40    | IGHD3-3  | IGHJ4;IGLJ2 | IGHG1;IGLC2 | 1964 | 1 | 0,1 |
| 221_IGHV3-33_IGHJ4  | 221 | 5,9 | t2 | CSF | BCR | 1 | IGH;IGL | IGHV3-33;IGLV1-40    | IGHD3-3  | IGHJ4;IGLJ2 | IGHG1;IGLC2 | 333  | 1 | 0,3 |
| 240_IGHV4-39_IGHJ5  | 240 | 5,9 | t1 | CSF | BCR | 1 | IGH;IGK | IGHV4-39;IGKV3-20    | IGHD2-21 | IGHJ5;IGKJ4 | IGHG1;IGKC  | 1964 | 1 | 0,1 |
| 240_IGHV4-39_IGHJ5  | 240 | 5,9 | t2 | CSF | BCR | 1 | IGH;IGK | IGHV4-39;IGKV3-20    | IGHD2-21 | IGHJ5;IGKJ4 | IGHG1;IGKC  | 333  | 1 | 0,3 |
| 241_IGHV3-7_IGHJ4   | 241 | 5,9 | t1 | CSF | BCR | 1 | IGH;IGK | IGHV3-7;IGKV4-1      | IGHD6-6  | IGHJ4;IGKJ2 | IGHA1;None  | 1964 | 1 | 0,1 |
| 241_IGHV3-7_IGHJ4   | 241 | 5,9 | t2 | CSF | BCR | 1 | IGH;IGK | IGHV3-7;IGKV4-1      | IGHD6-13 | IGHJ4;IGKJ2 | IGHA1;IGKC  | 333  | 1 | 0,3 |
| 244_IGHV4-34_IGHJ6  | 244 | 5,9 | t1 | CSF | BCR | 1 | IGH;IGK | IGHV4-34;IGKV2-28    | IGHD6-13 | IGHJ6;IGKJ2 | IGHG1;IGKC  | 1964 | 1 | 0,1 |
| 244_IGHV4-34_IGHJ6  | 244 | 5,9 | t2 | CSF | BCR | 1 | IGH;IGK | IGHV4-34;IGKV2-28    | IGHD6-13 | IGHJ6;IGKJ2 | IGHG1;IGKC  | 333  | 1 | 0,3 |
| 59_IGHV1-46_IGHJ6   | 59  | 5,9 | t1 | CSF | BCR | 1 | IGH;IGK | IGHV1-46;IGKV2-28    | IGHD6-19 | IGHJ6;IGKJ3 | IGHG1;IGKC  | 1964 | 1 | 0,1 |
| 59_IGHV1-46_IGHJ6   | 59  | 5,9 | t2 | CSF | BCR | 1 | IGH;IGK | IGHV1-46;IGKV2-28    | IGHD6-19 | IGHJ6;IGKJ3 | IGHG1;IGKC  | 333  | 1 | 0,3 |
| 64_IGHV4-61_IGHJ3   | 64  | 5,9 | t1 | CSF | BCR | 1 | IGH;IGK | IGHV4-61;IGKV3-20    | IGHD6-19 | IGHJ3;IGKJ3 | IGHG1;IGKC  | 1964 | 1 | 0,1 |
| 64_IGHV4-61_IGHJ3   | 64  | 5,9 | t2 | CSF | BCR | 1 | IGH;IGK | IGHV4-61;IGKV3-20    | IGHD6-19 | IGHJ3;IGKJ3 | IGHG1;IGKC  | 333  | 1 | 0,3 |
| 66_IGHV4-59_IGHJ5   | 66  | 5,9 | t1 | CSF | BCR | 1 | IGH;IGK | IGHV4-59;IGKV4-1     | IGHD6-19 | IGHJ5;IGKJ3 | IGHA1;IGKC  | 1964 | 1 | 0,1 |
| 66_IGHV4-59_IGHJ5   | 66  | 5,9 | t2 | CSF | BCR | 1 | IGH;IGK | IGHV4-59;IGKV4-1     | IGHD6-19 | IGHJ5;IGKJ3 | IGHG1;IGKC  | 333  | 1 | 0,3 |
| 67_IGHV1-3_IGHJ3    | 67  | 5,9 | t1 | CSF | BCR | 1 | IGH;IGK | IGHV1-3;IGKV1-39     | IGHD2-15 | IGHJ3;IGKJ4 | IGHG1;IGKC  | 1964 | 1 | 0,1 |
| 67_IGHV1-3_IGHJ3    | 67  | 5,9 | t2 | CSF | BCR | 1 | IGH;IGK | IGHV1-3;IGKV1-39     | IGHD2-15 | IGHJ3;IGKJ4 | IGHG1;IGKC  | 333  | 1 | 0,3 |
| 69_IGHV5-10-1_IGHJ6 | 69  | 5,9 | t1 | CSF | BCR | 1 | IGH;IGK | IGHV5-10-1;IGKV1D-39 | IGHD2-15 | IGHJ6;IGKJ1 | IGHG1;IGKC  | 1964 | 1 | 0,1 |
| 69_IGHV5-10-1_IGHJ6 | 69  | 5,9 | t2 | CSF | BCR | 1 | IGH;IGK | IGHV5-10-1;IGKV1D-39 | IGHD2-15 | IGHJ6;IGKJ1 | IGHA1;IGKC  | 333  | 1 | 0,3 |
| 92_IGHV1-2_IGHJ4    | 92  | 5,9 | t1 | CSF | BCR | 1 | IGH;IGL | IGHV1-2;IGLV7-46     | IGHD3-10 | IGHJ4;IGLJ2 | IGHG1;IGLC2 | 1964 | 2 | 0,1 |
| 92_IGHV1-2_IGHJ4    | 92  | 5,9 | t1 | CSF | BCR | 1 | IGH;IGL | IGHV1-2;IGLV7-46     | IGHD3-10 | IGHJ4;IGLJ2 | IGHG1;IGLC2 | 1964 | 2 | 0,1 |
| 92_IGHV1-2_IGHJ4    | 92  | 5,9 | t2 | CSF | BCR | 1 | IGH;IGL | IGHV1-2;IGLV7-46     | IGHD3-10 | IGHJ4;IGLJ2 | IGLC2;None  | 333  | 2 | 0,6 |
| 92_IGHV1-2_IGHJ4    | 92  | 5,9 | t2 | CSF | BCR | 1 | IGH;IGL | IGHV1-2;IGLV7-46     | IGHD3-10 | IGHJ4;IGLJ2 | IGHG1;IGLC2 | 333  | 2 | 0,6 |
| 25_IGHV3-23_IGHJ4   | 25  | 4,6 | t1 | CSF | BCR | 2 | IGH;IGK | IGHV3-23;IGKV1-5     | IGHD6-13 | IGHJ4;IGKJ1 | IGHG1;IGKC  | 1964 | 9 | 0,5 |
| 25_IGHV3-23_IGHJ4   | 25  | 4,6 | t1 | CSF | BCR | 1 | IGH;IGK | IGHV3-23;IGKV1-5     | IGHD6-13 | IGHJ4;IGKJ1 | IGHG1;IGKC  | 1964 | 9 | 0,5 |
| 25_IGHV3-23_IGHJ4   | 25  | 4,6 | t1 | CSF | BCR | 2 | IGH;IGK | IGHV3-23;IGKV1-5     | IGHD6-13 | IGHJ4;IGKJ1 | IGHG1;IGKC  | 1964 | 9 | 0,5 |
| 25_IGHV3-23_IGHJ4   | 25  | 4,6 | t1 | CSF | BCR | 1 | IGH;IGK | IGHV3-23;IGKV1-5     | IGHD6-13 | IGHJ4;IGKJ1 | IGHG1;IGKC  | 1964 | 9 | 0,5 |
| 25_IGHV3-23_IGHJ4   | 25  | 4,6 | t1 | CSF | BCR | 1 | IGH;IGK | IGHV3-23;IGKV1-5     | IGHD6-13 | IGHJ4;IGKJ1 | IGHG1;IGKC  | 1964 | 9 | 0,5 |
| 25_IGHV3-23_IGHJ4   | 25  | 4,6 | t1 | CSF | BCR | 1 | IGH;IGK | IGHV3-23;IGKV1-5     | IGHD6-13 | IGHJ4;IGKJ1 | IGHG1;IGKC  | 1964 | 9 | 0,5 |
| 25_IGHV3-23_IGHJ4   | 25  | 4,6 | t2 | CSF | BCR | 2 | IGH;IGK | IGHV3-23;IGKV1-5     | IGHD6-13 | IGHJ4;IGKJ1 | IGHG1;IGKC  | 333  | 7 | 2,1 |

|                     |     |     |    |     |     |   |         |                    |          |             |             |      |   |     |
|---------------------|-----|-----|----|-----|-----|---|---------|--------------------|----------|-------------|-------------|------|---|-----|
| 25_IGHV3-23_IGHJ4   | 25  | 4,6 | t2 | CSF | BCR | 1 | IGH;IGK | IGHV3-23;IGKV1-5   | IGHD6-13 | IGHJ4;IGK1  | IGHG1;IGKC  | 333  | 7 | 2,1 |
| 25_IGHV3-23_IGHJ4   | 25  | 4,6 | t2 | CSF | BCR | 1 | IGH;IGK | IGHV3-23;IGKV1-5   | IGHD6-13 | IGHJ4;IGK1  | IGHG1;IGKC  | 333  | 7 | 2,1 |
| 25_IGHV3-23_IGHJ4   | 25  | 4,6 | t2 | CSF | BCR | 1 | IGH;IGK | IGHV3-23;IGKV1-5   | IGHD6-13 | IGHJ4;IGK1  | IGHG1;IGKC  | 333  | 7 | 2,1 |
| 25_IGHV3-23_IGHJ4   | 25  | 4,6 | t2 | CSF | BCR | 2 | IGH;IGK | IGHV3-23;IGKV1-5   | IGHD6-13 | IGHJ4;IGK1  | IGHG1;IGKC  | 333  | 7 | 2,1 |
| 22_IGHV3-11_IGHJ4   | 22  | 4,4 | t1 | CSF | BCR | 1 | IGH;IGL | IGHV3-11;IGLV1-51  | IGHD6-19 | IGHJ4;IGLJ3 | IGHA1;IGLC2 | 1964 | 4 | 0,2 |
| 22_IGHV3-11_IGHJ4   | 22  | 4,4 | t1 | CSF | BCR | 1 | IGH;IGL | IGHV3-11;IGLV1-51  | IGHD6-19 | IGHJ4;IGLJ3 | IGHA1;IGLC2 | 1964 | 4 | 0,2 |
| 22_IGHV3-11_IGHJ4   | 22  | 4,4 | t1 | CSF | BCR | 1 | IGH;IGL | IGHV3-11;IGLV1-51  | IGHD6-19 | IGHJ4;IGLJ3 | IGHA1;IGLC2 | 1964 | 4 | 0,2 |
| 22_IGHV3-11_IGHJ4   | 22  | 4,4 | t1 | CSF | BCR | 1 | IGH;IGL | IGHV3-11;IGLV1-51  | IGHD6-19 | IGHJ4;IGLJ3 | IGHA1;IGLC2 | 1964 | 4 | 0,2 |
| 22_IGHV3-11_IGHJ4   | 22  | 4,4 | t2 | CSF | BCR | 1 | IGH;IGL | IGHV3-11;IGLV1-51  | IGHD6-19 | IGHJ4;IGLJ3 | IGHA1;IGLC2 | 333  | 3 | 0,9 |
| 22_IGHV3-11_IGHJ4   | 22  | 4,4 | t2 | CSF | BCR | 2 | IGH;IGL | IGHV3-11;IGLV1-51  | IGHD6-19 | IGHJ4;IGLJ3 | IGHA1;IGLC2 | 333  | 3 | 0,9 |
| 24_IGHV1-24_IGHJ2   | 24  | 4,4 | t1 | CSF | BCR | 1 | IGH;IGL | IGHV1-24;IGLV4-69  | IGHD3-22 | IGHJ2;IGLJ2 | IGHG1;IGLC2 | 1964 | 4 | 0,2 |
| 24_IGHV1-24_IGHJ2   | 24  | 4,4 | t1 | CSF | BCR | 2 | IGH;IGL | IGHV1-24;IGLV4-69  | IGHD3-22 | IGHJ2;IGLJ2 | IGHG1;IGLC2 | 1964 | 4 | 0,2 |
| 24_IGHV1-24_IGHJ2   | 24  | 4,4 | t2 | CSF | BCR | 1 | IGH;IGL | IGHV1-24;IGLV4-69  | IGHD3-22 | IGHJ2;IGLJ2 | IGHG1;IGLC2 | 333  | 3 | 0,9 |
| 24_IGHV1-24_IGHJ2   | 24  | 4,4 | t2 | CSF | BCR | 2 | IGH;IGL | IGHV1-24;IGLV4-69  | IGHD3-22 | IGHJ2;IGLJ2 | IGHG1;IGLC2 | 333  | 3 | 0,9 |
| 63_IGHV2-5_IGHJ5    | 63  | 3,9 | t1 | CSF | BCR | 1 | IGH;IGK | IGHV2-5;IGKV1-39   | IGHD3-10 | IGHJ5;IGK4  | IGHG1;IGKC  | 1964 | 3 | 0,2 |
| 63_IGHV2-5_IGHJ5    | 63  | 3,9 | t1 | CSF | BCR | 1 | IGH;IGK | IGHV2-5;IGKV1-39   | IGHD3-10 | IGHJ5;IGK2  | IGHG1;IGKC  | 1964 | 3 | 0,2 |
| 63_IGHV2-5_IGHJ5    | 63  | 3,9 | t1 | CSF | BCR | 1 | IGH;IGK | IGHV2-5;IGKV1-39   | IGHD3-10 | IGHJ5;IGK2  | IGHG1;IGKC  | 1964 | 3 | 0,2 |
| 63_IGHV2-5_IGHJ5    | 63  | 3,9 | t2 | CSF | BCR | 1 | IGH;IGK | IGHV2-5;IGKV1-39   | IGHD3-10 | IGHJ5;IGK2  | IGHG1;IGKC  | 333  | 2 | 0,6 |
| 63_IGHV2-5_IGHJ5    | 63  | 3,9 | t2 | CSF | BCR | 1 | IGH;IGK | IGHV2-5;IGKV1-39   | IGHD3-10 | IGHJ5;IGK2  | IGHG1;IGKC  | 333  | 2 | 0,6 |
| 141_IGHV3-21_IGHJ3  | 141 | 3,5 | t1 | CSF | BCR | 1 | IGH;IGK | IGHV3-21;IGKV1D-39 | IGHD2-2  | IGHJ3;IGK1  | IGHG1;IGKC  | 1964 | 5 | 0,3 |
| 141_IGHV3-21_IGHJ3  | 141 | 3,5 | t1 | CSF | BCR | 2 | IGH;IGK | IGHV3-21;IGKV1D-39 | IGHD2-2  | IGHJ3;IGK1  | IGHG1;IGKC  | 1964 | 5 | 0,3 |
| 141_IGHV3-21_IGHJ3  | 141 | 3,5 | t1 | CSF | BCR | 1 | IGH;IGK | IGHV3-21;IGKV1D-39 | IGHD2-2  | IGHJ3;IGK1  | IGHG1;IGKC  | 1964 | 5 | 0,3 |
| 141_IGHV3-21_IGHJ3  | 141 | 3,5 | t1 | CSF | BCR | 1 | IGH;IGK | IGHV3-21;IGKV1D-39 | IGHD2-2  | IGHJ3;IGK1  | IGHG1;IGKC  | 1964 | 5 | 0,3 |
| 141_IGHV3-21_IGHJ3  | 141 | 3,5 | t2 | CSF | BCR | 1 | IGH;IGK | IGHV3-21;IGKV1D-39 | IGHD2-2  | IGHJ3;IGK1  | IGHG1;IGKC  | 333  | 3 | 0,9 |
| 141_IGHV3-21_IGHJ3  | 141 | 3,5 | t2 | CSF | BCR | 1 | IGH;IGK | IGHV3-21;IGKV1D-39 | IGHD2-2  | IGHJ3;IGK1  | IGHG1;IGKC  | 333  | 3 | 0,9 |
| 141_IGHV3-21_IGHJ3  | 141 | 3,5 | t2 | CSF | BCR | 1 | IGH;IGK | IGHV3-21;IGKV1D-39 | IGHD2-2  | IGHJ3;IGK1  | IGHG1;IGKC  | 333  | 3 | 0,9 |
| 102_IGHV3-23_IGHJ4  | 102 | 2,9 | t1 | CSF | BCR | 1 | IGH;IGK | IGHV3-23;IGKV1-5   | IGHD2-8  | IGHJ4;IGK1  | IGHG1;IGKC  | 1964 | 2 | 0,1 |
| 102_IGHV3-23_IGHJ4  | 102 | 2,9 | t1 | CSF | BCR | 1 | IGH;IGK | IGHV3-23;IGKV1-5   | IGHD6-13 | IGHJ4;IGK1  | IGHG1;IGKC  | 1964 | 2 | 0,1 |
| 102_IGHV3-23_IGHJ4  | 102 | 2,9 | t2 | CSF | BCR | 1 | IGH;IGK | IGHV3-23;IGKV1-5   | IGHD6-13 | IGHJ4;IGK1  | IGHG1;IGKC  | 333  | 1 | 0,3 |
| 108_IGHV1-8_IGHJ4   | 108 | 2,9 | t1 | CSF | BCR | 1 | IGH;IGK | IGHV1-8;IGKV3-15   | IGHD3-10 | IGHJ4;IGK1  | IGHG1;IGKC  | 1964 | 2 | 0,1 |
| 108_IGHV1-8_IGHJ4   | 108 | 2,9 | t1 | CSF | BCR | 1 | IGH;IGK | IGHV1-8;IGKV3-15   | IGHD3-10 | IGHJ4;IGK1  | IGHG1;IGKC  | 1964 | 2 | 0,1 |
| 108_IGHV1-8_IGHJ4   | 108 | 2,9 | t2 | CSF | BCR | 1 | IGH;IGK | IGHV1-8;IGKV3-15   | IGHD3-10 | IGHJ4;IGK1  | IGHG1;IGKC  | 333  | 1 | 0,3 |
| 150_IGHV1-69D_IGHJ3 | 150 | 2,9 | t1 | CSF | BCR | 1 | IGH;IGK | IGHV1-69D;IGKV3-20 | IGHD6-19 | IGHJ3;IGK3  | IGHG1;IGKC  | 1964 | 2 | 0,1 |
| 150_IGHV1-69D_IGHJ3 | 150 | 2,9 | t1 | CSF | BCR | 1 | IGH;IGK | IGHV1-69D;IGKV3-20 | IGHD6-19 | IGHJ3;IGK3  | IGHG1;IGKC  | 1964 | 2 | 0,1 |
| 150_IGHV1-69D_IGHJ3 | 150 | 2,9 | t2 | CSF | BCR | 1 | IGH;IGK | IGHV1-69D;IGKV3-20 | IGHD6-19 | IGHJ3;IGK3  | IGHG1;IGKC  | 333  | 1 | 0,3 |
| 175_IGHV3-30_IGHJ4  | 175 | 2,9 | t1 | CSF | BCR | 2 | IGH;IGK | IGHV3-30;IGKV6-21  | IGHD3-10 | IGHJ4;IGK4  | IGHG4;IGKC  | 1964 | 2 | 0,1 |
| 175_IGHV3-30_IGHJ4  | 175 | 2,9 | t2 | CSF | BCR | 1 | IGH;IGK | IGHV3-30;IGKV6-21  | IGHD3-10 | IGHJ4;IGK4  | IGHG4;IGKC  | 333  | 1 | 0,3 |
| 188_IGHV1-69_IGHJ5  | 188 | 2,9 | t1 | CSF | BCR | 1 | IGH;IGL | IGHV1-69;IGLV2-11  | IGHD6-6  | IGHJ5;IGLJ2 | IGHG1;IGLC2 | 1964 | 2 | 0,1 |
| 188_IGHV1-69_IGHJ5  | 188 | 2,9 | t1 | CSF | BCR | 1 | IGH;IGL | IGHV1-69;IGLV2-11  | IGHD6-6  | IGHJ5;IGLJ2 | IGHG1;IGLC2 | 1964 | 2 | 0,1 |
| 188_IGHV1-69_IGHJ5  | 188 | 2,9 | t2 | CSF | BCR | 1 | IGH;IGL | IGHV1-69;IGLV2-11  | IGHD6-6  | IGHJ5;IGLJ2 | IGHG1;IGLC2 | 333  | 1 | 0,3 |
| 228_IGHV3-21_IGHJ1  | 228 | 2,9 | t1 | CSF | BCR | 1 | IGH;IGL | IGHV3-21;IGLV6-57  | IGHD6-13 | IGHJ1;IGLJ2 | IGHG1;IGLC2 | 1964 | 2 | 0,1 |
| 228_IGHV3-21_IGHJ1  | 228 | 2,9 | t1 | CSF | BCR | 1 | IGH;IGL | IGHV3-21;IGLV6-57  | IGHD6-13 | IGHJ1;IGLJ2 | IGHG1;IGLC2 | 1964 | 2 | 0,1 |
| 228_IGHV3-21_IGHJ1  | 228 | 2,9 | t2 | CSF | BCR | 1 | IGH;IGL | IGHV3-21;IGLV6-57  | IGHD6-13 | IGHJ1;IGLJ2 | IGHG1;IGLC2 | 333  | 1 | 0,3 |
| 233_IGHV3-74_IGHJ6  | 233 | 2,9 | t1 | CSF | BCR | 2 | IGH;IGL | IGHV3-74;IGLV3-25  | IGHD2-2  | IGHJ6;IGLJ3 | IGHG1;IGLC2 | 1964 | 2 | 0,1 |
| 233_IGHV3-74_IGHJ6  | 233 | 2,9 | t2 | CSF | BCR | 1 | IGH;IGL | IGHV3-74;IGLV3-25  | IGHD2-2  | IGHJ6;IGLJ3 | IGHG1;IGLC2 | 333  | 1 | 0,3 |
| 245_IGHV1-69D_IGHJ4 | 245 | 2,9 | t1 | CSF | BCR | 2 | IGH;IGK | IGHV1-69D;IGKV2-24 | IGHD3-22 | IGHJ4;IGK2  | IGHA1;IGKC  | 1964 | 2 | 0,1 |
| 245_IGHV1-69D_IGHJ4 | 245 | 2,9 | t2 | CSF | BCR | 1 | IGH;IGK | IGHV1-69D;IGKV2-24 | IGHD3-22 | IGHJ4;IGK2  | IGHA1;IGKC  | 333  | 1 | 0,3 |
| 35_IGHV3-23_IGHJ4   | 35  | 2,9 | t1 | CSF | BCR | 2 | IGH;IGK | IGHV3-23;IGKV1-33  | IGHD6-19 | IGHJ4;IGK4  | IGHG1;IGKC  | 1964 | 2 | 0,1 |
| 35_IGHV3-23_IGHJ4   | 35  | 2,9 | t2 | CSF | BCR | 1 | IGH;IGK | IGHV3-23;IGKV1-33  | IGHD4-23 | IGHJ4;IGK4  | IGHG1;IGKC  | 333  | 1 | 0,3 |
| 38_IGHV3-73_IGHJ4   | 38  | 2,9 | t1 | CSF | BCR | 1 | IGH;IGL | IGHV3-73;IGLV1-47  | IGHD2-15 | IGHJ4;IGLJ3 | IGHG1;IGLC2 | 1964 | 2 | 0,1 |
| 38_IGHV3-73_IGHJ4   | 38  | 2,9 | t1 | CSF | BCR | 1 | IGH;IGL | IGHV3-73;IGLV1-47  | IGHD2-15 | IGHJ4;IGLJ3 | IGHG1;IGLC2 | 1964 | 2 | 0,1 |
| 38_IGHV3-73_IGHJ4   | 38  | 2,9 | t2 | CSF | BCR | 1 | IGH;IGL | IGHV3-73;IGLV1-47  | IGHD2-15 | IGHJ4;IGLJ3 | IGHG1;IGLC2 | 1964 | 1 | 0,3 |
| 53_IGHV4-39_IGHJ4   | 53  | 2,9 | t1 | CSF | BCR | 2 | IGH;IGL | IGHV4-39;IGLV3-10  | IGHD6-19 | IGHJ4;IGLJ2 | IGHG3;IGLC2 | 333  | 6 | 0,3 |
| 53_IGHV4-39_IGHJ4   | 53  | 2,9 | t1 | CSF | BCR | 1 | IGH;IGL | IGHV4-39;IGLV3-10  | IGHD6-19 | IGHJ4;IGLJ2 | IGHG4;IGLC2 | 1964 | 6 | 0,3 |
| 53_IGHV4-39_IGHJ4   | 53  | 2,9 | t1 | CSF | BCR | 1 | IGH;IGL | IGHV4-39;IGLV3-10  | IGHD6-19 | IGHJ4;IGLJ2 | IGHG1;IGLC2 | 1964 | 6 | 0,3 |
| 53_IGHV4-39_IGHJ4   | 53  | 2,9 | t1 | CSF | BCR | 1 | IGH;IGL | IGHV4-39;IGLV3-10  | IGHD6-19 | IGHJ4;IGLJ2 | IGHG3;IGLC2 | 1964 | 6 | 0,3 |
| 53_IGHV4-39_IGHJ4   | 53  | 2,9 | t1 | CSF | BCR | 1 | IGH;IGL | IGHV4-39;IGLV3-10  | IGHD6-19 | IGHJ4;IGLJ2 | IGHG4;IGLC2 | 1964 | 6 | 0,3 |
| 53_IGHV4-39_IGHJ4   | 53  | 2,9 | t2 | CSF | BCR | 1 | IGH;IGL | IGHV4-39;IGLV3-10  | IGHD6-19 | IGHJ4;IGLJ2 | IGHG3;IGLC2 | 333  | 3 | 0,9 |
| 53_IGHV4-39_IGHJ4   | 53  | 2,9 | t2 | CSF | BCR | 1 | IGH;IGL | IGHV4-39;IGLV3-10  | IGHD6-19 | IGHJ4;IGLJ2 | IGHG3;IGLC2 | 333  | 3 | 0,9 |

|                     |     |     |    |     |     |   |         |                     |          |             |             |      |   |     |
|---------------------|-----|-----|----|-----|-----|---|---------|---------------------|----------|-------------|-------------|------|---|-----|
| 53_IGHV4-39_IGHJ4   | 53  | 2,9 | t2 | CSF | BCR | 1 | IGH;IGL | IGHV4-39;IGLV3-10   | IGHD6-19 | IGHJ4;IGLJ2 | IGHG3;IGLC2 | 333  | 3 | 0,9 |
| 54_IGHV4-61_IGHJ4   | 54  | 2,9 | t1 | CSF | BCR | 1 | IGH;IGK | IGHV4-61;IGKV1D-17  | IGHD5-18 | IGHJ4;IGKJ1 | IGHG1;IGKC  | 1964 | 2 | 0,1 |
| 54_IGHV4-61_IGHJ4   | 54  | 2,9 | t1 | CSF | BCR | 1 | IGH;IGK | IGHV4-61;IGKV1D-17  | IGHD5-18 | IGHJ4;IGKJ2 | IGHG1;IGKC  | 1964 | 2 | 0,1 |
| 54_IGHV4-61_IGHJ4   | 54  | 2,9 | t2 | CSF | BCR | 1 | IGH;IGK | IGHV4-61;IGKV1D-17  | IGHD5-18 | IGHJ4;IGKJ1 | IGHG1;IGKC  | 333  | 1 | 0,3 |
| 74_IGHV3-15_IGHJ3   | 74  | 2,9 | t1 | CSF | BCR | 2 | IGH;IGK | IGHV3-15;IGKV4-1    | IGHD5-12 | IGHJ3;IGKJ2 | IGHG1;IGKC  | 1964 | 2 | 0,1 |
| 74_IGHV3-15_IGHJ3   | 74  | 2,9 | t2 | CSF | BCR | 1 | IGH;IGK | IGHV3-15;IGKV4-1    | IGHD1-26 | IGHJ3;IGKJ2 | IGHG1;IGKC  | 333  | 1 | 0,3 |
| 80_IGHV1-2_IGHJ3    | 80  | 2,9 | t1 | CSF | BCR | 1 | IGH;IGK | IGHV1-2;IGKV1D-39   | IGHD1-20 | IGHJ3;IGKJ2 | IGHA1;IGKC  | 1964 | 2 | 0,1 |
| 80_IGHV1-2_IGHJ3    | 80  | 2,9 | t1 | CSF | BCR | 1 | IGH;IGK | IGHV1-2;IGKV1D-39   | IGHD1-20 | IGHJ3;IGKJ2 | IGHG1;IGKC  | 1964 | 2 | 0,1 |
| 80_IGHV1-2_IGHJ3    | 80  | 2,9 | t2 | CSF | BCR | 1 | IGH;IGK | IGHV1-2;IGKV1D-39   | IGHD1-20 | IGHJ3;IGKJ2 | IGHA1;IGKC  | 333  | 1 | 0,3 |
| 20_IGHV4-30-2_IGHJ5 | 20  | 2,4 | t1 | CSF | BCR | 5 | IGH;IGK | IGHV4-30-2;IGKV3-11 | IGHD3-9  | IGHJ5;IGKJ2 | IGHG1;IGKC  | 1964 | 5 | 0,3 |
| 20_IGHV4-30-2_IGHJ5 | 20  | 2,4 | t2 | CSF | BCR | 2 | IGH;IGK | IGHV4-30-2;IGKV3-11 | IGHD3-9  | IGHJ5;IGKJ2 | IGHG1;IGKC  | 333  | 2 | 0,6 |
| 94_IGHV3-23_IGHJ4   | 94  | 2,4 | t1 | CSF | BCR | 3 | IGH;IGK | IGHV3-23;IGKV1-5    | IGHD1-16 | IGHJ4;IGKJ1 | IGHG1;IGKC  | 1964 | 5 | 0,3 |
| 94_IGHV3-23_IGHJ4   | 94  | 2,4 | t1 | CSF | BCR | 1 | IGH;IGK | IGHV3-23;IGKV1-5    | IGHD1-26 | IGHJ4;IGKJ1 | IGHG1;IGKC  | 1964 | 5 | 0,3 |
| 94_IGHV3-23_IGHJ4   | 94  | 2,4 | t1 | CSF | BCR | 1 | IGH;IGK | IGHV3-23;IGKV1-5    | IGHD1-26 | IGHJ4;IGKJ1 | IGKC;None   | 1964 | 5 | 0,3 |
| 94_IGHV3-23_IGHJ4   | 94  | 2,4 | t2 | CSF | BCR | 1 | IGH;IGK | IGHV3-23;IGKV1-5    | IGHD3-16 | IGHJ4;IGKJ1 | IGHG1;IGKC  | 333  | 2 | 0,6 |
| 94_IGHV3-23_IGHJ4   | 94  | 2,4 | t2 | CSF | BCR | 1 | IGH;IGK | IGHV3-23;IGKV1-5    | IGHD1-26 | IGHJ4;IGKJ1 | IGHG1;IGKC  | 333  | 2 | 0,6 |
| 119_IGHV3-21_IGHJ4  | 119 | 2,0 | t1 | CSF | BCR | 2 | IGH;IGK | IGHV3-21;IGKV1D-17  | IGHD3-22 | IGHJ4;IGKJ3 | IGHG4;IGKC  | 1964 | 3 | 0,2 |
| 119_IGHV3-21_IGHJ4  | 119 | 2,0 | t1 | CSF | BCR | 1 | IGH;IGK | IGHV3-21;IGKV1D-17  | IGHD3-22 | IGHJ4;IGKJ3 | IGHG1;IGKC  | 1964 | 3 | 0,2 |
| 119_IGHV3-21_IGHJ4  | 119 | 2,0 | t2 | CSF | BCR | 1 | IGH;IGK | IGHV3-21;IGKV1D-17  | IGHD3-22 | IGHJ4;IGKJ3 | IGHG4;IGKC  | 333  | 1 | 0,3 |
| 120_IGHV5-51_IGHJ4  | 120 | 2,0 | t1 | CSF | BCR | 1 | IGH;IGL | IGHV5-51;IGLV3-25   | IGHD6-13 | IGHJ4;IGLJ2 | IGHG1;IGLC2 | 1964 | 3 | 0,2 |
| 120_IGHV5-51_IGHJ4  | 120 | 2,0 | t1 | CSF | BCR | 1 | IGH;IGL | IGHV5-51;IGLV3-25   | IGHD6-13 | IGHJ4;IGLJ2 | IGHA1;IGLC2 | 1964 | 3 | 0,2 |
| 120_IGHV5-51_IGHJ4  | 120 | 2,0 | t2 | CSF | BCR | 1 | IGH;IGL | IGHV5-51;IGLV3-25   | IGHD6-13 | IGHJ4;IGLJ2 | IGHG1;IGLC2 | 1964 | 3 | 0,2 |
| 120_IGHV5-51_IGHJ4  | 120 | 2,0 | t2 | CSF | BCR | 1 | IGH;IGL | IGHV5-51;IGLV3-25   | IGHD6-13 | IGHJ4;IGLJ2 | IGHG1;IGLC2 | 333  | 1 | 0,3 |
| 164_IGHV3-74_IGHJ4  | 164 | 2,0 | t1 | CSF | BCR | 2 | IGH;IGK | IGHV3-74;IGKV2-30   | IGHD3-10 | IGHJ4;IGKJ4 | IGHA1;IGKC  | 1964 | 3 | 0,2 |
| 164_IGHV3-74_IGHJ4  | 164 | 2,0 | t1 | CSF | BCR | 1 | IGH;IGK | IGHV3-74;IGKV2-30   | IGHD5-12 | IGHJ4;IGKJ4 | IGHG1;IGKC  | 1964 | 3 | 0,2 |
| 164_IGHV3-74_IGHJ4  | 164 | 2,0 | t2 | CSF | BCR | 1 | IGH;IGK | IGHV3-74;IGKV2-30   | IGHD3-10 | IGHJ4;IGKJ4 | IGHG1;IGKC  | 333  | 1 | 0,3 |
| 167_IGHV1-69_IGHJ4  | 167 | 2,0 | t1 | CSF | BCR | 2 | IGH;IGK | IGHV1-69;IGKV2-30   | IGHD1-26 | IGHJ4;IGKJ1 | IGHG1;IGKC  | 1964 | 3 | 0,2 |
| 167_IGHV1-69_IGHJ4  | 167 | 2,0 | t1 | CSF | BCR | 1 | IGH;IGK | IGHV1-69;IGKV2-30   | IGHD1-26 | IGHJ4;IGKJ1 | IGHG1;IGKC  | 1964 | 3 | 0,2 |
| 167_IGHV1-69_IGHJ4  | 167 | 2,0 | t2 | CSF | BCR | 1 | IGH;IGK | IGHV1-69;IGKV2-30   | IGHD1-26 | IGHJ4;IGKJ1 | IGHG1;IGKC  | 333  | 1 | 0,3 |
| 60_IGHV4-59_IGHJ3   | 60  | 2,0 | t1 | CSF | BCR | 1 | IGH;IGK | IGHV4-59;IGKV2D-28  | IGHD5-18 | IGHJ3;IGKJ1 | IGHG1;IGKC  | 1964 | 3 | 0,2 |
| 60_IGHV4-59_IGHJ3   | 60  | 2,0 | t1 | CSF | BCR | 2 | IGH;IGK | IGHV4-59;IGKV2-28   | IGHD5-18 | IGHJ3;IGKJ1 | IGHG1;IGKC  | 1964 | 3 | 0,2 |
| 60_IGHV4-59_IGHJ3   | 60  | 2,0 | t2 | CSF | BCR | 1 | IGH;IGK | IGHV4-59;IGKV2-28   | IGHD1-26 | IGHJ3;IGKJ1 | IGHG1;IGKC  | 333  | 1 | 0,3 |
| 61_IGHV1-24_IGHJ4   | 61  | 2,0 | t1 | CSF | BCR | 2 | IGH;IGK | IGHV1-24;IGKV2-30   | IGHD3-9  | IGHJ4;IGKJ4 | IGHG1;IGKC  | 1964 | 3 | 0,2 |
| 61_IGHV1-24_IGHJ4   | 61  | 2,0 | t1 | CSF | BCR | 1 | IGH;IGK | IGHV1-24;IGKV2-30   | IGHD3-9  | IGHJ4;IGKJ4 | IGHG1;IGKC  | 1964 | 3 | 0,2 |
| 61_IGHV1-24_IGHJ4   | 61  | 2,0 | t2 | CSF | BCR | 1 | IGH;IGK | IGHV1-24;IGKV2-30   | IGHD3-9  | IGHJ4;IGKJ4 | IGHG1;IGKC  | 333  | 1 | 0,3 |
| 97_IGHV3-48_IGHJ4   | 97  | 2,0 | t1 | CSF | BCR | 1 | IGH;IGK | IGHV3-48;IGKV2-24   | IGHD3-10 | IGHJ4;IGKJ5 | IGHG1;IGKC  | 1964 | 3 | 0,2 |
| 97_IGHV3-48_IGHJ4   | 97  | 2,0 | t1 | CSF | BCR | 1 | IGH;IGK | IGHV3-48;IGKV2-24   | IGHD2-15 | IGHJ4;IGKJ5 | IGHG1;IGKC  | 1964 | 3 | 0,2 |
| 97_IGHV3-48_IGHJ4   | 97  | 2,0 | t1 | CSF | BCR | 1 | IGH;IGK | IGHV3-48;IGKV1-9    | IGHD3-10 | IGHJ4;IGKJ2 | IGHG1;IGKC  | 1964 | 3 | 0,2 |
| 97_IGHV3-48_IGHJ4   | 97  | 2,0 | t2 | CSF | BCR | 1 | IGH;IGK | IGHV3-48;IGKV2-24   | IGHD3-3  | IGHJ4;IGKJ5 | IGHG1;IGKC  | 333  | 1 | 0,3 |
| 107_IGHV4-61_IGHJ4  | 107 | 1,5 | t1 | CSF | BCR | 1 | IGH;IGK | IGHV4-61;IGKV3-15   | IGHD5-24 | IGHJ4;IGKJ2 | IGHG1;IGKC  | 1964 | 4 | 0,2 |
| 107_IGHV4-61_IGHJ4  | 107 | 1,5 | t1 | CSF | BCR | 2 | IGH;IGK | IGHV4-61;IGKV3-15   | IGHD5-24 | IGHJ4;IGKJ2 | IGHG1;IGKC  | 1964 | 4 | 0,2 |
| 107_IGHV4-61_IGHJ4  | 107 | 1,5 | t1 | CSF | BCR | 1 | IGH;IGK | IGHV4-61;IGKV3-15   | IGHD5-24 | IGHJ4;IGKJ2 | IGKC;None   | 1964 | 4 | 0,2 |
| 107_IGHV4-61_IGHJ4  | 107 | 1,5 | t2 | CSF | BCR | 1 | IGH;IGK | IGHV4-61;IGKV3D-15  | IGHD5-24 | IGHJ4;IGKJ2 | IGHG1;IGKC  | 333  | 1 | 0,3 |
| 123_IGHV3-33_IGHJ5  | 123 | 1,5 | t1 | CSF | BCR | 4 | IGH;IGL | IGHV3-33;IGLV1-40   | IGHD4-23 | IGHJ5;IGLJ3 | IGHA1;IGLC2 | 1964 | 4 | 0,2 |
| 123_IGHV3-33_IGHJ5  | 123 | 1,5 | t2 | CSF | BCR | 1 | IGH;IGL | IGHV3-33;IGLV1-40   | IGHD4-23 | IGHJ5;IGLJ3 | IGHA1;IGLC2 | 333  | 1 | 0,3 |
| 126_IGHV3-30_IGHJ4  | 126 | 1,5 | t1 | CSF | BCR | 1 | IGH;IGK | IGHV3-30;IGKV1-9    | IGHD3-10 | IGHJ4;IGKJ3 | IGHM;IGKC   | 1964 | 4 | 0,2 |
| 126_IGHV3-30_IGHJ4  | 126 | 1,5 | t1 | CSF | BCR | 1 | IGH;IGK | IGHV3-30;IGKV1-9    | IGHD3-10 | IGHJ4;IGKJ3 | IGHG1;IGKC  | 1964 | 4 | 0,2 |
| 126_IGHV3-30_IGHJ4  | 126 | 1,5 | t1 | CSF | BCR | 2 | IGH;IGK | IGHV3-30;IGKV1-9    | IGHD3-10 | IGHJ4;IGKJ3 | IGHG1;IGKC  | 1964 | 4 | 0,2 |
| 126_IGHV3-30_IGHJ4  | 126 | 1,5 | t2 | CSF | BCR | 1 | IGH;IGK | IGHV3-30;IGKV1-9    | IGHD3-10 | IGHJ4;IGKJ3 | IGHG1;IGKC  | 333  | 1 | 0,3 |
| 217_IGHV1-2_IGHJ6   | 217 | 1,5 | t1 | CSF | BCR | 1 | IGH;IGK | IGHV1-2;IGKV1D-39   | IGHD3-10 | IGHJ6;IGKJ1 | IGHM;IGKC   | 1964 | 4 | 0,2 |
| 217_IGHV1-2_IGHJ6   | 217 | 1,5 | t1 | CSF | BCR | 1 | IGH;IGK | IGHV1-2;IGKV1D-39   | IGHD3-10 | IGHJ6;IGKJ1 | IGHM;IGKC   | 1964 | 4 | 0,2 |
| 217_IGHV1-2_IGHJ6   | 217 | 1,5 | t1 | CSF | BCR | 1 | IGH;IGK | IGHV1-2;IGKV1D-39   | IGHD3-10 | IGHJ6;IGKJ1 | IGHG1;IGKC  | 1964 | 4 | 0,2 |
| 217_IGHV1-2_IGHJ6   | 217 | 1,5 | t1 | CSF | BCR | 1 | IGH;IGK | IGHV1-2;IGKV1D-39   | IGHD3-10 | IGHJ6;IGKJ1 | IGHM;IGKC   | 1964 | 4 | 0,2 |
| 217_IGHV1-2_IGHJ6   | 217 | 1,5 | t2 | CSF | BCR | 1 | IGH;IGK | IGHV1-2;IGKV1D-39   | IGHD3-10 | IGHJ6;IGKJ1 | IGHG3;IGKC  | 333  | 1 | 0,3 |
| 125_IGHV4-34_IGHJ4  | 125 | 1,2 | t1 | CSF | BCR | 1 | IGH;IGK | IGHV4-34;IGKV4-1    | IGHD3-10 | IGHJ4;IGKJ5 | IGHA1;IGKC  | 1964 | 5 | 0,3 |
| 125_IGHV4-34_IGHJ4  | 125 | 1,2 | t1 | CSF | BCR | 1 | IGH;IGK | IGHV4-34;IGKV4-1    | IGHD3-10 | IGHJ4;IGKJ5 | IGHG1;IGKC  | 1964 | 5 | 0,3 |
| 125_IGHV4-34_IGHJ4  | 125 | 1,2 | t1 | CSF | BCR | 1 | IGH;IGK | IGHV4-34;IGKV4-1    | IGHD3-10 | IGHJ4;IGKJ5 | IGHG1;IGKC  | 1964 | 5 | 0,3 |
| 125_IGHV4-34_IGHJ4  | 125 | 1,2 | t1 | CSF | BCR | 1 | IGH;IGK | IGHV4-34;IGKV4-1    | IGHD3-10 | IGHJ4;IGKJ5 | IGHG1;IGKC  | 1964 | 5 | 0,3 |
| 125_IGHV4-34_IGHJ4  | 125 | 1,2 | t2 | CSF | BCR | 1 | IGH;IGK | IGHV4-34;IGKV4-1    | IGHD3-10 | IGHJ4;IGKJ5 | IGHG1;IGKC  | 333  | 1 | 0,3 |

















Full V(D)J sequence of expanded clones

| clone                | nucleotide sequence                                                                                                                                                                                                                                                                                                                                                                                                                                                                                                                                                                                                                                                                                                                                                                                                         |
|----------------------|-----------------------------------------------------------------------------------------------------------------------------------------------------------------------------------------------------------------------------------------------------------------------------------------------------------------------------------------------------------------------------------------------------------------------------------------------------------------------------------------------------------------------------------------------------------------------------------------------------------------------------------------------------------------------------------------------------------------------------------------------------------------------------------------------------------------------------|
| 168_I_GHV1-18_I_GHJ4 | ATCACATAAACACACATCCCTCCTCTAAAGAAGCCCCGGGAGCACAGCTCATACCATTGACTGGACCTGGAGGATCCTCTTTGGTGGCAGCAGCTACAGGTGTCAGTCCCAGGTGCAGCTGGTGAGTCTGGGGCTGAGTCAAGAAGCCTGGGTCTTCGGTGAAAG<br>GTCTCCTGCACGGCTTCTGGAGGCACTTTCAGCAGTAATGCTTTCACCTGGGTGGCAGCGACCCCTGGCAGGGCTTGGAGTGGCTGGGAGGCTTATCCCTATTTTGGGACATCAAACACAGCACAGAAGTTCAGGGGAGAAATCACGATTAAACGGACGAGTCCACGA<br>GTACAGTCTACATGAACTGAGTAGCTGAGAACTGACGACACGGCCGTGTACTTCTGTGGCAGCGTGATAAAGAAAAGTTCCCTCTATGCTTACTATGTACTCCTGGGGCCAGGGAACCTGGTACCCTCTCGTACGTTCCACCAAGGGCCCATCCGTCTTCCCTCT<br>GGCGCCCTGCTCCAGGAGCACCTCCGAGAGCACAGCCGCTGGCTGGTCTGCTCAAGGACTACTTCCCCAACCCTGGACGGTGTCTGTGGAAGTCAAGCGCCCTGACACAGCGCGGTGCACACCTTCCCGGCTGTCTACAGTCTCCAGGA                                                                                                                                         |
| 168_I_GHV1-18_I_GHJ4 | ATCACATAAACACACATCCCTCCTCTAAAGAAGCCCCGGGAGCACAGCTCATACCATTGACTGGACCTGGAGGATCCTCTTTGGTGGCAGCAGCTACAGGTGTCAGTCCCAGGTGCAGCTGGTGAGTCTGGGGCTGAGTCAAGAAGCCTGGGTCTTCGGTGAAAG<br>GTCTCCTGCACGGCTTCTGGAGGCACTTTCAGCAGTAATGCTTTCACCTGGGTGGCAGCGACCCCTGGCAGGGCTTGGAGTGGCTGGGAGGCTTATCCCTATTTTGGGACTTCAAACACAGCACAGAAGTTCAGGGGAGAAATCACGATTAAACGGACGAGTCCACGC<br>GTACAGTCTACATGAACTGAGTAGCTGAGAACTGACGACACGGCCGTGTACTTCTGTGGCAGCGTGATAAAGAAAAGTTCCCTCTATGCTTACTATGTACTCCTGGGGCCAGGGAACCTGGTACCCTCTCGTACGTTCCACCAAGGGCCCATCCGTCTTCCCTCT<br>GGCGCCCTGCTCCAGGAGCACCTCCGAGAGCACAGCCGCTGGCTGGTCTGCTCAAGGACTACTTCCCCAACCCTGGACGGTGTCTGTGGAAGTCAAGCGCCCTGACACAGCGCGGTGCACACCTTCCCGGCTGTCTACAGTCTCCAGGA                                                                                                                                         |
| 168_I_GHV1-18_I_GHJ4 | ATCACATAAACACACATCCCTCCTCTAAAGAAGCCCCGGGAGCACAGCTCATACCATTGACTGGACCTGGAGGATCCTCTTTGGTGGTGGCAGCAGCTACAGGTGTCAGTCCCAGGTGCAGCTGGTGAGTCTGGGGCTGAGTCAAGAAGCCTGGGTCTTCGGTGAAAG<br>GTCTCCTGCACGGCTTCTGGAGGCACTTTCAGCAGTAATGCTTTCACCTGGGTGGCAGCGACCCCTGGCAGGGCTTGGAGTGGCTGGGAGGCTTATCCCTATTTTGGGACATCAAACACAGCACAGAAGTTCAGGGGAGAAATCACGATTAAACGGACGAGTCCACGA<br>GTACAGTCTACATGAACTGAGTAGCTGAGAACTGACGACACGGCCGTGTACTTCTGTGGCAGCGTGATAAAGAAAAGTTCCCTCTATGCTTACTATGTACTCCTGGGGCCAGGGAACCTGGTACCCTCTCGTACGTTCCACCAAGGGCCCATCCGTCTTCCCTCT<br>GGCGCCCTGCTCCAGGAGCACCTCCGAGAGCACAGCCGCTGGCTGGTCTGCTCAAGGACTACTTCCCCAACCCTGGACGGTGTCTGTGGAAGTCAAGCGCCCTGACACAGCGCGGTGCACACCTTCCCGGCTGTCTACAGTCTCCAGGA                                                                                                                                      |
| 191_I_GHV1-2_I_GHJ2  | GAGCATCACCCAGCAACACATCTGTCTCTAGAGAATCCCCTGAGAGCTCCGTTCTCACCATTGACTGGACCTGGAGGATCCTCTTCTTGGTGGCAGCAGCCACAGGAGCCCACTCCAGGTGCAGCTGGTGACAGTCTGGGCTGAGGTGGGAAGCCTGGGGCTCAATG<br>AAGGTCTCCTGCAAGGCTTCTGGAACCACTTCCGCCCTACTATATCAACTGGATTGCACAGGCCCTGGACAAGGGCTTGGAGTGGATGGATGATCAATGCTGTCTCTGGCAGACAACTATGCCAGAAATTCAGGGCCGGTACCATGACCAGGGACACGTCCCTC<br>AAAACAGCCGACATGAGCTGAGTAGCTGAAATATGACGACACGGCCGTGTATTATTGTGCGAAGACGGGGATCCCGCTCAAGACTGGTACTTGGATCTTGGGGCCCTGGCAGCCTGGTCACTGTCTCCTCAGCTCCACCAAGGGCCCATCCGTCTTCCCTCTGGCGCC<br>TGCTCCAGGAGCACCTCCGAGAGCACAGCGCCCTGGCTGGTCTGCTCAAGGACTACTTCCCCAACCCTGGACGGTGTCTGTGGAAGTCAAGCGCCCTGACACAGCGCGGTGCACACCTTCCCGGCTGTCTACAGTCTCCAGGA                                                                                                                                              |
| 191_I_GHV1-2_I_GHJ2  | GGGAGCATCACCCAGCAACACATCTGTCTCTAGAGAATCCCCTGAGAGCTCCGTTCTCACCATTGACTGGACCTGGAGGATCCTCTTCTTGGTGGCAGCAGCCACAGGAGCCCACTCCAGGTGCAGCTGGTGACAGTCTGGGCTGAGGTGGGAAGCCTGGGGCTCA<br>GGGAAGGTCTCCTGCAAGGCTTCTGGAGGCACTCCGGCGCCTATTATATCAACTGGGTTGCGACAGGCCCTGGACAAGGGCTTGGAGTGGATGGATGGATCAATGCTGTCTCTGGCAGACAACTATGCCAGAAATTCAGGGCCGGTACCATGACCAGGGGACGTCCCTC<br>CCCGCAACACAGCCGACATGAGCTGAGTAGCTGAAATCTGACGACACGGCCGTGTATTATTGTGCGAAGACGGGGATCCCGCTCAAGACTGGTACTTGGATCTTGGGGCCCTGGCAGCCTGGTCACTGTCTCCTCAGCTCCACCAAGGGCCCATCCGTCTTCCCTCTGGCGCC<br>CGCCCTGCTCCAGGAGCACCTCCGAGAGCACAGCGCCCTGGCTGGTCTGCTCAAGGACTACTTCCCCAACCCTGGACGGTGTCTGTGGAAGTCAAGCGCCCTGACACAGCGCGGTGCACACCTTCCCGGCTGTCTACAGTCTCCAGGA                                                                                                                                |
| 191_I_GHV1-2_I_GHJ2  | GGGAGCATCACCCAGCAACACATCTGTCTCTAGAGAATCCCCTGAGAGCTCCGTTCTCACCATTGACTGGACCTGGAGGATCCTCTTCTTGGTGGCAGCAGCCACAGGAGCCCACTCCAGGTGCAGCTGGTGACAGTCTGGGCTGAGGTGGGAAGCCTGGGGCTCAG<br>TGAAGGTCTCCTGCAAGGCTTCTGGAAGCACCTTCAGCGCTACTATATCAACTGGGTTGCGACAGGCCCTGGACAAGGGCTTGGAGTGGATGGATGGATCAACCTGTACTGTGACACAACTATGCCAGAAATTCAGGGCCGGTACCATGACCAGGGGACGTCC<br>CTCAACACAGCCGACATGAGCTGAGTAGCTGAAATCTGACGACATGCGCGTGTATTATTGTGCGAAGACGGGGATCCCGCTCAAGACTGGTACTTGGATCTTGGGGCCCTGGCAGCCTGGTCACTGTCTCCTCAGCTCCACCAAGGGCCCATCCGTCTTCCCTCTGGCGCC<br>CCCTGCTCCAGGAGCACCTCCGAGAGCACAGCGCCCTGGCTGGTCTGCTCAAGGACTACTTCCCCAACCCTGGACGGTGTCTGTGGAAGTCAAGCGCCCTGACACAGCGCGGTGCACACCTTCCCGGCTGTCTACAGTCTCCAGGA                                                                                                                                         |
| 28_I_GHV3-43_I_GHJ3  | GAAGTGTAATCACTCTGGGACACAGCCCACTCAGAGGCGTCCCTCCAGAACCCCTATATAGTAGGAGACATGAAATAGGGCCCTCCTCTGTGATGAAAACAGCCCACTCCAGGTGCAGCTGGGAGAGGAGCCCAAGCCCTGAGATTCCAGGTGTTCCATTCA<br>GTGATCAGCACTGAAACACAGAGGACTCACCATTGGAGTTGGGACTGAGCTGGATTTTCCCTTTTAAAGGTGTCCAGTGTGAAGTGCAGCTGGTGGAGTCTGGAGTCTGGGGAGGCTTGGAGTCTGGGGAGGCTTGGAGTCTGGGGAGGCTTGGAGTCTGGGGAGGCTTGG<br>TTGATGATTATGCCATGCACTGGGTCCGGCAAGCTCCAGGATGGCCCTGGAGTGGGTCTCAAGTATAAATGGTGAATGATAGATAGATGCGACTCTGTGAAGGGCCGATTCAACATCTCCAGAGACAACGCCAAGAACTCCCTGTATCTGCAGATGAACAGTCTG<br>AGACCTGAGGACACGGCCTGTATTACTGTGCAAGGAAAGGACCGAGAATACTACTTACTTGTCTGTATGCTGTGGGCAAGGGACAATGGTACCCTGTCTTCCAGCTCCACCAAGGGCCCATCCGTCTTCCCTCTGGCGCCCTCCTCAAGAGCACCTCTGGGGCACAGCG<br>GCCCTGGGCTGCTGTCAAGGACTACTTCCCCAACCCTGGACGGTGTCTGTGGAAGTCAAGCGCCCTGACACAGCGCGGTGCACACCTTCCCGGCTGTCTACAGTCTCCAGGA |
| 28_I_GHV3-43_I_GHJ3  | TGGGGGGGAGAGGAGCCCAAGCCCTGAGATTCCAGGTGTTCCATTCACTGATCAGCACTGAACACAGAGGACTCACCATTGGAGTTGGGACTGAGCTGGATTTCCCTTTTGGGCTTAAAGGTGTCCAGTGTGAAGTGCAGCTGGTGGAGTCTGGGGAGGCTTGG<br>GTACAGCTTGGCAGTCCCTGAGACTCTCCTGTGCAGCTCTGATTCACTTGTGATGATTATGCCATGCACTGGTCCGGCAAGCTCCAGGATGGGCTGGAGTGGTCTCAAGTATAAATGGTGAATGATAGACTATGCGACTCTGTGAAGGGCCGATTCA<br>CCATCTCCAGAGACAACGCCAAGAACTCCCTGTATCTGCAGATGAACAGTCTGAGACCTGAGGACACGGCCTTGTATTACTGTGCAAGGAAAGACCGAGAATACTACTTACTTGTCTGTATGCTGTGGGGCAAAGGGACAATGGTACCCTGTCTTCCAGCTCCACCAAGGGCCCA<br>TGGTCTTCCCTCTGGCAGCTCCTCAAGAGCACCTCTGGGGCACAGCGCCCTGGCTGGTCTGCTCAAGGACTACTTCCCCAACCCTGGACGGTGTCTGTGGAAGTCAAGCGCCCTGACACAGCGCGGTGCACACCTTCCCGGCTGTCTACAGTCTCCAGGA                                                                                                                                |
| 4_I_GHV4-59_I_GHJ4   | TGGGAATGCTTCTGAGAGTCTGGACCTCCTGTGAAAGAATATGAACATCTGTGTTTCTTCTTCTCCTGGTGGCAGCTCCAGATGTGCTGTCCAGGTGGCCCTGAGGAGTCCGGCCCAAGCTGGTGAAGCCTTCGAGACCTGTCCCTCACTTGCAGTGTCT<br>TGGTACTCAATGAATACCTATTATTGGTACTGATCCGGCAGCCCCAGGGAAAGGGCTGGAGTGGATTGGGTATATCTATTACAGTGGAGCACCAACTACAACCCCTCCCTCAAGAGTCTGAGTCCATATCAGTAGACCTGTCCAAGAGCCACTCTCCCTGAACCTGACCT<br>CTGTACCCTGCGGACACGGCCGTTTATTATTGTGCGAGAGACTGTGGTACGTCCCTGACCCTGGGGCCAGGGAACCTGGTACCCTGTCTCAGCTCCACCAAGGGCCCATCCGTCTTCCCTCTGGCAGCTCCTCAAGAGCACCTCTGGGGCACAGCGCCCTG<br>GGCTGCTGTCAAGGACTACTTCCCCAACCCTGGACGGTGTCTGTGGAAGTCAAGCGCCCTGACACAGCGCGGTGCACACCTTCCCGGCTGTCTACAGTCTCCAGGA                                                                                                                                                                                           |

|                      |                                                                                                                                                                                                                                                                                                                                                                                                                                                                                                                                                                                                                                                                                           |
|----------------------|-------------------------------------------------------------------------------------------------------------------------------------------------------------------------------------------------------------------------------------------------------------------------------------------------------------------------------------------------------------------------------------------------------------------------------------------------------------------------------------------------------------------------------------------------------------------------------------------------------------------------------------------------------------------------------------------|
| 4_I_GHV4-59_I_GHJ4   | AGGTTCCAGCTCACATGGGAATGCTTCTGAGAGTCTCTGACCTCTGTGAAAGAAATATGAACATCTGTGGTTCTTCTTCTCTCTGGTGGCAGCTCCAGATGTCTCTGCCAGGTGCGCCTGCGAGTGGGCCAGGACTGGTGAAGCCTTCGAGACCTGTCC<br>TCACTGCACTGTCTCTGGTACTCAATGAATACCTATTGTTGACTGGGACTCGGCGAGCCCGGGAAGGGGCTGGAGTGGATTGGGTATATCTATTACAGTGGGAGCACCACTACAACCCCTCCCTCAAGAGTCAGTCTCATATCAGTAGACCTGTCCAAGAGCCACTTC<br>TCCCTGAACCTGACCTGTCTACCCGCTGCGGACACGGCCGTTTATTATTGTGCGAGAGGACTGTGTGACCTCCCTGACCACTGGGGCCAGGAAACCTGTCCACCGTCTCTCAGCCTCCACCAAGGGCCCATCGTCTTCCCCCTGGCACCTCTCCAAGAGCACCTGTGG<br>GGCACAGCGCCCTGGCTGCTGGTCAAGGACTACTCCCCGAACCGGTGACGGTGTCTGTGAACTCAGCGCCCTGACCAGCGGCTGCACACCTTCCCGGTCTCTACAGTCTCAGGA                                             |
| 4_I_GHV4-59_I_GHJ4   | CTTCTGAGAGTCTCTGACCTCTGTGCAAGAAATATGAACATCTGTGGTTCTTCTTCTCTCTGGTGGCAGCTCCAGATGGTCTCTGCCAGGTGCGCCTGCGAGTGGGCCAGGACTGGTGAAGCCTTCGAGACCTGTCCCTCACTTGCAGTGTCTCTGGTACT<br>CATGAATACCTATTATTGGTATTGGATTGCGGAGCCCCAGGGAAAGGACTGGAGTGGATTGGGTATATCTATTACAGTGGGACCACTACAACCCCTCCCTCAAGAGTCAGTCTCATATCAATAGACCTGTCCAAGAGCCACTTCTCCCTGAACCTGACCTGTACCCG<br>TGCAGACACGGCCGTTTATTATTGTGCGAGAGGACTGTGTGACCTCCCTGACCACTGGGGCCCGGAAACCTGTCCACCGTCTCTCAGCCTCCACCAAGGGCCCATCGTCTTCCCCCTGGCACCTCTCCAAGAGCACCTGTGGGGGCACAGCGCCCTGGCTGCTGG<br>TCAAGGACTACTTCCCCGAACCGGTGACGGTGTCTGTGAACCTCAGCGCCCTGACCAGCGGCTGCACACCTTCCCGGTCTCTACAGTCTCAGGA                                                                   |
| 46_I_GHV1-69D_I_GHJ6 | ATCACATAACAACCACATCTCTCTTAAGAAAGCCCTGGGAGCACAGCTCATCACCATGGACTGGACTGGAGGTTCTCTTTTGGTGGCAGCAGCTACAGGTGTCCAGTCCCAGGTGCACCTGGTGCAGTCTGGGGCTGAGGTGAAGAAAGCTGGGTCTCGGTGAAG<br>GTCTCTTGAAGGCTTCTGGTGGCACCTTCAAGCACTATGCCATCAGCTGGGTGCGACAGGCCGCTGGACAAGGCTTGGAGTGGATGGGAGGATCATCCCTATGTTTGAACAGCAAGGTATCACAGAAAGTCCAGGGCAGAAATCACGATTGACACGGACGCTCAAGCA<br>ACACAGGTTACATGAGATGAGGAGCCTGAAATATGAGGACACGGCCATATATTACTGTGTGAGAGTGGCCAGGGCAGTCCCTCGAGGCGCTATGACGCTGTGGGGCCAGGGACCAAGGTCCACCGTCTCTCAGCCTCCACCAAGGGCCCATCGTCTTCCCCCTGGCA<br>CCCTCCTCCAAGAGCACCTGTGGGGGCACAGCGCCCTGGGCTGCTGTCAAGGACTACTCCCCGAACCGGTGACGGTGTCTGTGAACCTCAGCGCCCTGACCAGCGGCTGCACACCTTCCCGGTCTCTACAGTCTCAGGA               |
| 46_I_GHV1-69D_I_GHJ6 | ATCACATAACAACCACATCTCTCTTAAGAAAGCCCTGGGAGCACAGCTCATCACCATGGACTGGACTGGAGGTTCTCTTTTGGTGGCAGCAGCTACAGGTGTCCAGTCCCAGGTGCACCTGGTGCAGTCTGGGGCTGAGGTGAAGAAAGCTGGGTCTCGGTGAAG<br>GTCTCTTGAAGGCTTCTGGTGGCACCTTCAAGCACTATGCCATCAGCTGGGTGCGACAGGCCGCTGGACAAGGCTTGGAGTGGATGGGAGGATCATCCCTATGTTTGAACAGCAAGGTATCACAGAAAGTCCAGGGCAGAAATCACGATTGACACGGACGCTCAAGCA<br>ACACAGGTTACATGAGATGAGGAGCCTGAAATATGAGGACACGGCCATATATTACTGTGTGAGAGTGGCCAGGGCAGTCCCTCGAGGCGCTATGACGCTGTGGGGCCAGGGACCAAGGTCCACCGTCTCTCAGCCTCCACCAAGGGCCCATCGTCTTCCCCCTGGCA<br>CCCTCCTCCAAGAGCACCTGTGGGGGCACAGCGCCCTGGGCTGCTGTCAAGGACTACTCCCCGAACCGGTGACGGTGTCTGTGAACCTCAGCGCCCTGACCAGCGGCTGCACACCTTCCCGGTCTCTACAGTCTCAGGA               |
| 46_I_GHV1-69D_I_GHJ6 | ATCACATAACAACCACATCTCTCTTAAGAAAGCCCTGGGAGCACAGCTCATCACCATGGACTGGACTGGAGGTTCTCTTTTGGTGGCAGCAGCTACAGGTGTCCAGTCCCAGGTGCACCTGGTGCAGTCTGGGGCTGAGGTGAAGAAAGCTGGGTCTCGGTGAAG<br>GTCTCTTGAAGGCTTCTGGTGGCACCTTCAAGCACTATGCCATCAGCTGGGTGCGACAGGCCGCTGGACAAGGCTTGGAGTGGATGGGAGGATCATCCCTATGTTTGAACAGCAAGGTATCACAGAAAGTCCAGGGCAGAAATCACGATTGACACGGACGCTCAAGCA<br>ACACAGGTTACATGAGATGAGGAGCCTGAAATATGAGGACACGGCCATATATTACTGTGTGAGAGTGGCCAGGGCAGTCCCTCGAGGCGCTATGACGCTGTGGGGCCAGGGACCAAGGTCCACCGTCTCTCAGCCTCCACCAAGGGCCCATCGTCTTCCCCCTGGCA<br>CCCTCCTCCAAGAGCACCTGTGGGGGCACAGCGCCCTGGGCTGCTGTCAAGGACTACTCCCCGAACCGGTGACGGTGTCTGTGAACCTCAGCGCCCTGACCAGCGGCTGCACACCTTCCCGGTCTCTACAGTCTCAGGA               |
| 51_I_GHV1-2_I_GHJ5   | GAGCATCACCCAGCAACACATCTGTCTCTAGAGAAATCCCCTGAGAGTCCGTTCTCACCATGGACTGGACTGGAGGATCTCTTCTTGGTGGCAGCAGCCAGAGCCAGTCCCAGGTGCAGTGGTGCAGTCTGGGGCTGAGGTGAAGAAAGCTGGGGCTCAGTA<br>AAGGTCTCTGCAAGGCTCTGATACACCTTCAAGTGGCCAGTATATGACTGGTGGCAGAGTCCCTGGACAAGGCTTGGAGTGGATGGGGTGGATCAACCCCAAGAGTGGCGGCACACTCTTGCAGCAAGTTCAGGGCAGGCTCATCATGACCAGGGACACCTCCA<br>TCACACCGCTCATGAGCTGCAAGTCTGAGATCTGACGACACGGCCGTTTACTGTGCGAGAGATCTAGGATCAATATGGTTCGGGAGAGTGTGGTCTTGGACCCCTGGGGCCAGGAAACCTGTCCACCGTCTCTCAGCCTCCACCAAGGGCCCATCGGT<br>CTTCCCCCTGGCACCTCTCCAAGAGCACCTGTGGGGGCACAGCGCCCTGGGCTGCTGTCAAGGACTACTCCCCGAACCGGTGACGGTGTCTGTGAACCTCAGCGCCCTGACCAGCGGCTGCACACCTTCCCGGTCTCTACAGTCTCAGGA                    |
| 51_I_GHV1-2_I_GHJ5   | GGGAGCATCACCCAGCAACACATCTGTCTCTAGAGAAATCCCCTGAGAGTCCGTTCTCACCATGGACTGGACTGGAGGATCTCTTCTTGGTGGCAGCAGCCAGAGCCACTCCCAGGTGCAGTGGTGCAGTCTGGGGCTGAGGTGAAGAAAGCTGGGGCTCAGTA<br>TGAAGGTCTCTGCAAGGCTCTGTGATACAGCTTCAAGGCTACTATATACACTGTTGCGACAGGCCCTGGACAAGGACTTCAAGTGGATGGGGTGGATCAACCCCAAGAGTGGCGGCACACTCTATGCAAAAGAACTTTCAGGGCAGGCTCATCATGACCAGGGACACCTCCA<br>ATCAGCACAGTCTACATGATCTGAGCAGGCTGAGATCCGACGACACGGCCGTTTATTCTGTGCGAGAGATCTAGGATTAATTGGTTTGGGGAGAGAGTGTGGTCTTGGACCCCTGGGGCCAGGAAACCTGTCCACCGTCTCTCAGCCTCCACCAAGGGCCCATCGG<br>TCTTCCCCCTGGCACCTCTCCAAGAGCACCTGTGGGGGCACAGCGCCCTGGGCTGCTGTCAAGGACTACTCCCCGAACCGGTGACGGTGTCTGTGAACCTCAGCGCCCTGACCAGCGGCTGCACACCTTCCCGGTCTCTACAGTCTCAGGA |
| 51_I_GHV1-2_I_GHJ5   | GGGAGCATCACCCAGCAACACATCTGTCTCTAGAGAAATCCCCTGAGAGTCCGTTCTCACCATGGACTGGACTGGAGGATCTCTTCTTGGTGGCAGCAGCCAGAGCCACTCCCAGGTGCAGTGGTGCAGTCTGGGGCTGAGGTGAAGAAAGCTGGGGCTCA<br>GTAAGGTCTCTGCAAGGCTCTGTGATACAGCTTCAAGGCTACTATATACACTGTTGCGACAGGCCCTGGACAAGGACTTCAAGTGGATGGGGTGGATCAACCCCAAGAGTGGCGGCACACTCTTGCAGCAAGTTCAGGGCAGGCTCATCATGACCAGGGACACCTCCA<br>CCATCACACCGCTCATGAGCTGAGAGCCTGAGATCTGGCGACACGGCCGTTTATTCTGTGCGAGAGATCTAGGATTAATTGGTTTGGGGAGAGAGTGTGGTCTTGGACCCCTGGGGCCAGGAAACCTGTCCACCGTCTCTCAGCCTCCACCAAGGGCCCATC<br>GGTCTTCCCCCTGGCACCTCTCCAAGAGCACCTGTGGGGGCACAGCGCCCTGGGCTGCTGTCAAGGACTACTCCCCGAACCGGTGACGGTGTCTGTGAACCTCAGCGCCCTGACCAGCGGCTGCACACCTTCCCGGTCTCTACAGTCTCAGGA          |
| 14_I_GHV4-39_I_GHJ4  | AACACGTTCAAGTGGACACCTGGATGCTTCTGAGAGTCAATGATCTCATGTGCAAGAAATGAAGCACCTGTGGTTATTCTCTCTGCTGGTGGCCTCCAGATGGTCTGCCAGCTGCAGTGGGAGTGGGCCAGGACTGGTGAAGCCTTCGAGACCTGTCC<br>CTCTATGCACTGTCTCTGGTCCGTCAGCAGTAACTGTTTCTATTGGGGCTGGATCCGCGAGCCCCAGGGAAAGGAGTTCGAGTGGATTGGGAGTATATACTATACTGGAGGACTACTACAACCCCTCCCTCAGAGTGGAGTCCACATATCCGTTGACACCTCAAG<br>AACAGTTCCTCAAGTTGAACCTGTGACCGCGCAGACACGGCTGTCTATTACTGTGTACACAAGTCTTGTACTGTTGATAGTTGCGGTCCACTGGGGCCAGGAAACCTGTCCACCGTCTCTCAGCCTCCACCAAGGGCCCATCGTCTTCCCCCTGGCACCTCC<br>TCCAAGAGCACCTGTGGGGGCACAGCGCCCTGGGCTGCTGTCAAGGACTACTCCCCGAACCGGTGACGGTGTCTGTGAACCTCAGCGCCCTGACCAGCGGCTGCACACCTTCCCGGTCTCTACAGTCTCAGGA                                    |
| 14_I_GHV4-39_I_GHJ4  | GGGATGCTTCTGAGAGTCAATGATCTCATGTGCAAGAAATGAAGCACCTGTGGTTATTCTCTCTGCTGGTGGCCTCCAGATGGTCTGTGCCAGCTGCAGTGGGAGTGGGCCAGGACTGGTGAAGCCTTCGAGACCTGTCCCTCTATGACTGTCT<br>GGTGGCTCCGTCAGCAGTAACTGTTTCTATTGGGGCTGGATCCGCGAGCCCCAGGGAAAGGAGTTCGAGTGGATTGGGAGTATATACTATACTGGAGGACTACTACAACCCCTCCCTCAGAGTGGAGTCCACATATCCGTTGACACCTCAAG<br>TTGAACCTGTGTACCGCGCAGACAGGCTGTCTATTACTGTGTACACAAGTCTTGTACTGTTGATAGTTGCGGTCCACTGGGGCCAGGAAACCTGTCCACCGTCTCTCAGCCTCCACCAAGGGCCCATCGTCTTCCCCCTGGCACCTCTCCAAGAGCACCTGTG<br>GGGCACAGCGCCCTGGGCTGCTGTCAAGGACTACTCCCCGAACCGGTGACGGTGTCTGTGAACCTCAGCGCCCTGACCAGCGGCTGCACACCTTCCCGGTCTCTACAGTCTCAGGA                                                                     |

|                      |                                                                                                                                                                                                                                                                                                                                                                                                                                                                                                                                                                                                                                           |
|----------------------|-------------------------------------------------------------------------------------------------------------------------------------------------------------------------------------------------------------------------------------------------------------------------------------------------------------------------------------------------------------------------------------------------------------------------------------------------------------------------------------------------------------------------------------------------------------------------------------------------------------------------------------------|
| 14_I_GHV4-39_I_GHJ4  | TTTCTTATATGGGGATGCTTCTGAGAGTCTATGATCTCATGTGCAAGAAAAGAACTGCTGTTATTCTCTCTGCTGGTGGCGCTCCAGATGGTCTGCCCCAGCTGAGCTGAGTGGGGCCAGGACTGGTGAAGCCTTCGGAGACCTGTCCCTCTATG<br>CAGTGTCTGTGGTGGCTCCGTGAGCAGTAACTGTTCTATTGGGGTGGATCCGCGACCCAGGAAAGGAGTTGGAGTGGAGTATATCTATAGTGGAGGACCTACTACAACCCGTCCTCAGAGTGGAGTACCATATCCCTTGACACGTCCAAGAACGATT<br>CTCCCTCAAGTTGAACTGTGTACCGCCGACACAGCGTGTCTTACTGTGTACACAGGCTCTTTGACTGTTGATAGTTGCCGTGCCACTGGGCCAGGAAACCTGTCTCAGCTCTCCTCAGCTCCACCAAGGGCCCATCGTCTCCCTGGCACCTCTCAAGA<br>GCACCTCTGGGGCACAGCGCCCTGGCTGCTGTCAAGACTACTCCCCGAACCGGTGACGGTGTCTGGAACCTCAGCGCCCTACCAGCGCGTGCACACCTTCCCGCTGTCTACAGTCTCAGGA               |
| 6_I_GHV1-18_I_GHJ6   | ACCCAAAAACACACCCCTCCTTGGGAGAAATCCCTAGATCACAGCTCCTCACCATGGAAGCTGGAGCATCTTTCTTGGTGGCAGCAGCAACAGGTGCCACTCCCAGGTTTCCAGTCTGGAGTGGAGTGAAGAACCTGGGGCTCAGTGAAGTCTCC<br>TGCAAGGCTCTGGTTACACCTTTACAGTCAAGTATCAGCTGGGTGCGACAGGCCCTGGACAAGGACTTGAAGTGGATGGATCCGCACTTCCAATGGTGACACAATTTGACAGAAAGTTCAGAACAGTCTCCATGACACAGACACATCCAGAGCGCAGCTT<br>TACATGAGCTGAGGAGCTGAGATCTGACGACAGCGCCGTATTACTGTGCGAGAGGGAAATAGATTACCTGGGAGATTACTACGGTATGACGTCTGGGCCAAGGACACAGGTCTGCTCTCAGCTCCACCAAGGGCCCATCGTCTCCCTGGCAC<br>CTCCTCAAGAGCACTCTGGGGCACAGCGCCCTGGGTGCTGTCAAGGACTACTCCCCGAACCGGTGACGGTGTCTGGAACCTCAGCGCCCTACCAGCGCGTGCACACCTTCCCGCTGTCTACAGTCTCAGGA        |
| 6_I_GHV1-18_I_GHJ6   | ACCCAAAAACACACCCCTCCTTGGGAGAAATCCCTAGATCACAGCTCCTCACCATGGAAGCTGGAGCATCTTTCTTGGTGGCAGCAGCAACAGGTGCCACTCCCAGGTTCAACTGGTGCAGTCTGGAGTGGAGTGAAGAACCTGGGGCTCAGTGAAGTCTCC<br>GTACGGCTCTGGTTACACCTTTACCAGCCAGGTATTAGCTGGGTGCGACAGGCCCTGGACAAGGACTTGAAGTGGATGGATCCGCACTTCCAATGGTGACACAATTTGACAGAAAGTTCAGAACAGTCTCCATGACACAGACACATCCAGAGCGCAGCTT<br>CATGGAGCTGAGGAGCTGAGATCTGACGACAGCGCCGTATTACTGTGCGAGAGAGGGAAATAGATTACCTGGGAGATTACTACGGTATGACGTCTGGGCCAAGGACACAGGTCTCAGCTCCACCAAGGGCCCATCGTCTCCCTGGCACCC<br>TCTCCAAGAGCACTCTGGGGCACAGCGCCCTGGGTGCTGTCAAGGACTACTCCCCGAACCGGTGACGGTGTCTGGAACCTCAGCGCCCTACCAGCGCGTGCACACCTTCCCGCTGTCTACAGTCTCAGGA    |
| 6_I_GHV1-18_I_GHJ6   | ACCCAAAAACACACCCCTCCTTGGGAGAAATCCCTAGATCACAGCTCCTCACCATGGAAGCTGGAGCATCTTTCTTGGTGGCAGCAGCAACAGGTGCCACTCCCAGGTTCAACTGGTGCAGTCTGGAGTGGAGTGAAGAACCTGGGGCTCAGTGAAGTCTCC<br>GTACGGCTCTGGTTACACCTTTACCAGCCAGGTATTAGCTGGGTGCGACAGGCCCTGGACAAGGACTTGAAGTGGATGGATCCGCACTTCCAATGGTGACACAATTTGACAGAAAGTTCAGAACAGTCTCCATGACACAGACACATCCAGAGCGCAGCTT<br>CATGGAGCTGAGGAGCTGAGATCTGACGACAGCGCCGTATTACTGTGCGAGAGAGGGAAATAGATTACCTGGGAGATTACTACGGTATGACGTCTGGGCCAAGGACACAGGTCTCAGCTCCACCAAGGGCCCATCGTCTCCCTGGCACCC<br>TCTCCAAGAGCACTCTGGGGCACAGCGCCCTGGGTGCTGTCAAGGACTACTCCCCGAACCGGTGACGGTGTCTGGAACCTCAGCGCCCTACCAGCGCGTGCACACCTTCCCGCTGTCTACAGTCTCAGGA    |
| 8_I_GHV5-51_I_GHJ4   | GCCAGCTGGGATCTCAGGCTTCAATTTCTGTCGCGACCATCATGGGTCAACCCCATCTCCCTCTCTGGTCTTCCAAGAGTCTGTGCGAGGTGCAGTGGTGCAGTCTGGAGCAGAGTGAAGAACCCGGGAGTCTGAAAGCTCTCTGTCAAGG<br>TTCTGGATAACAATTTACCCTTACTGATCGGCTGGTGGCCAGATGCCGGGAAAGGCTGAGTGGTGGGATCATCTATCTGGTACTCTGATACCAGATTAGCCCGTCTTCCGAGGCCAGTCTCAGCATCTCAGCCGACAACCTCATCAGACCCCTACTGCA<br>CTGGACCAGCTGAAGGCTCGACACCCCATGATTAAGTGTGCGATCTTTATTGGCGAGGGGCACTACTTGGCCAGGAAACCTGTGCACCGTCTCTCAGCTCCACCAAGGGCCCATCGTCTCCCTGGCACCTCTCCAAGAGCACTCTGGGGCACAGC<br>GGCCCTGGGCTGCTGTCAAGGACTACTCCCCGAACCGGTGACGGTGTCTGGAACCTCAGCGCCCTACCAGCGCGTGCACACCTTCCCGCTGTCTACAGTCTCAGGA                                   |
| 8_I_GHV5-51_I_GHJ4   | GCCAGCTGGGATCTCAGGCTTCAATTTCTGTCGCGACCATCATGGGTCAACCCCATCTCCCTCTCTGGTCTTCCAAGAGTCTGTGCGAGGTGCAGTGGTGCAGTCTGGAGCAGAGTGAAGAACCCGGGAGTCTGAAAGCTCTCTGTCAAGG<br>TTCTGGATAACAATTTACCCTTACTGATCGGCTGGTGGCCAGATGCCGGGAAAGGCTGAGTGGTGGGATCATCTATCTGGTACTCTGATACCAGATTAGCCCGTCTTCCGAGGCCAGTCTCAGCATCTCAGCCGACAACCTCATCAGACCCCTACTGCA<br>TGACCAGCTGAAGGCTCGACACCCCATGATTAAGTGTGCGATCTTTATTGGCGAGGGGCACTACTTGGCCAGGAAACCTGTGCACCGTCTCTCAGCTCCACCAAGGGCCCATCGTCTCCCTGGCACCTCTCCAAGAGCACTCTGGGGCACAGCG<br>GCCCTGGGCTGCTGTCAAGGACTACTCCCCGAACCGGTGACGGTGTCTGGAACCTCAGCGCCCTACCAGCGCGTGCACACCTTCCCGCTGTCTACAGTCTCAGGA                                     |
| 8_I_GHV5-51_I_GHJ4   | GCCAGCTGGGATCTCAGGCTTCAATTTCTGTCGCGACCATCATGGGTCAACCCCATCTCCCTCTCTGGTCTTCCAAGAGTCTGTGCGAGGTGCAGTGGTGCAGTCTGGAGCAGAGTGAAGAACCCGGGAGTCTGAAAGCTCTCTGTCAAGG<br>TTCTGGATAACAATTTACCCTTACTGATCGGCTGGTGGCCAGATGCCGGGAAAGGCTGAGTGGTGGGATCATCTATCTGGTACTCTGATACCAGATTAGCCCGTCTTCCGAGGCCAGTCTCAGCATCTCAGCCGACAACCTCATCAGACCCCTACTGCA<br>TGACCAGCTGAAGGCTCGACACCCCATGATTAAGTGTGCGATCTTTATTGGCGAGGGGCACTACTTGGCCAGGAAACCTGTGCACCGTCTCTCAGCTCCACCAAGGGCCCATCGTCTCCCTGGCACCTCTCCAAGAGCACTCTGGGGCACAGCG<br>GCCCTGGGCTGCTGTCAAGGACTACTCCCCGAACCGGTGACGGTGTCTGGAACCTCAGCGCCCTACCAGCGCGTGCACACCTTCCCGCTGTCTACAGTCTCAGGA                                     |
| 109_I_GHV2-5_I_GHJ3  | AGTACTCTGTGCCACCATGGACACTTTGCTCCAGCTCTGCTGCTGACCATCCCTCATGGGTCTGTGCCAGATCACCTTGAAGGAGTCTGTCTACGCTGTGAAACCCACACAGACCTCAGCTGACCTGACCTTCTGGGTTCTCACTCACCCTACCGAGT<br>GGGTGGGCTGGATCCGTGAGCCCCAGGAAAGGCCCTGGAGTGGCTTCTTACTATTGGGGTATGATAAGCGCTACAGCCCATCTGGAAGAGCAGGCTCACCATCACAAGGACACTCCAACCAAGGTTGGCCCTTACTATGACCAACATGACCCCTGTGACAC<br>AGCCACATATTTCTGTGCACACAACCTACTAATAGTCTGAGGGTCTTTGATATCTGGGCCAAGGACAATGGTCAACCGTCTCTCAGCTCCACCAAGGGCCCATCGTCTCCCTGGCACCTCTCCAAGAGCACTCTGGGGCACAGCGCCCTGGGTGCTG<br>GTCAAGGACTACTCCCCGAACCGGTGACGGTGTCTGGAACCTCAGCGCCCTACCAGCGCGTGCACACCTTCCCGCTGTCTACAGTCTCAGGA                                      |
| 109_I_GHV2-5_I_GHJ3  | GGAATCTGTGCCACCATGGACACTTTGCTCCAGCTCTGCTGCTGACCATCCCTCATGGGTCTGTGCCAGATCACCTTGAAGGAGTCTGTCTACGCTGTGAAACCCACACAGACCTCAGCTGACCTGACCTTCTGGGTTCTCACTCAGCACTAGCGAGT<br>GGTGGGCTGGATCCGTGAGCCCCAGGAAAGGCCCTGGAGTGGCTTGCATACATTTATTGGGGTATGATAAGCGCTACAGCCCATCTGGAAGAGCAGGCTCACCATCACAAGGACACTCCAACCAAGGTTGGCCCTTACAATGACCAACATGACCCCTGTGACACA<br>GCCACATATTTCTGTGCACACAACCTACTAATAGTCTGAGGGTCTTTGATATCTGGGCCAAGGACAATGGTCAACCGTCTCTCAGCTCCACCAAGGGCCCATCGTCTCCCTGGCACCTCTCCAAGAGCACTCTGGGGCACAGCGCCCTGGGTGCTGCTG<br>TCAAGGACTACTCCCCGAACCGGTGACGGTGTCTGGAACCTCAGCGCCCTACCAGCGCGTGCACACCTTCCCGCTGTCTACAGTCTCAGGA                                 |
| 11_I_GHV1-69D_I_GHJ5 | ATCAGTAAACAACCAATCTCTCTAAAGAACCCCTGGGAGCACAGCTCATCACCATGGAAGCTGGAGTGGTCTCTTTGGTGGTGGCAGCAGTGCAGGTGTCAGTCCCAGGTGCAGTGGTGCAGTCTGGGGCTGAGGTGAAGAACCTGGGTCTCGTGAAG<br>GTCTCTGCAAGGCTCTGGAGGACCTTCAACCTATATATCAACTGGGTGCGACAGGCCCCAGGAAAGGGCTGTAGTGGATGGAGGAGCATCCCTATCTTGGTACAGCAAACCTACGACAGAAAGTTCAGGGCAGAGTACGATTACCGCGACGAATCGACGA<br>GCACAGTCTACATGGAGTTGAGTACCTGAGATCTGAGGACAGCGCCGTATTACTGTACAAGAGCAGTGGTGTAAACAGGGTGGTTCGACCCCTGGGGCCAGGAAACCTGTGCACCGTCTCTCAGCTCCACCAAGGGCCCATCGTCTCCCTGGCACCTCT<br>TCCAAGAGCACTCTGGGGCACAGCGCCCTGGGTGCTGTCAAGGACTACTCCCCGAACCGGTGACGGTGTCTGGAACCTCAGCGCCCTACCAGCGCGTGCACACCTTCCCGCTGTCTACAGTCTCAGGA |

|                       |                                                                                                                                                                                                                                                                                                                                                                                                                                                                                                                                                                                                                                                                                                                                |
|-----------------------|--------------------------------------------------------------------------------------------------------------------------------------------------------------------------------------------------------------------------------------------------------------------------------------------------------------------------------------------------------------------------------------------------------------------------------------------------------------------------------------------------------------------------------------------------------------------------------------------------------------------------------------------------------------------------------------------------------------------------------|
| 11_I_GHV1-69D_I_GHJ5  | ATCACATAAACACCCATTCTCTCTAAAGAACCCCTGGGAGCACAGCTCATACCATGGACTGGACCTGGAGGTTCTCTTTGTGGTGCGCAGCTGACAGTGTCCAGTCCCAGGTGCAGCTGGTGAGTCTGGGGCTGAGGTGAAGAAGCCTGGGCTCGTGGAAGGTCTCCTGCAAGGCTTCTGGAGGCACCTTACACCTATATATCACTGGGTGGACAGGCCCAGGAAAGGCTTGTAGTGGATGGAGGGAGCATCCCTATCTTTGGTACAGCAAACCTACGACAGAAAGTTCAGGTGAGAGTACAGATTACCGCGACGAAATCGACAGACACAGCTACATGAGTTGAGTAGCCTGAGATCTGAGACACGGCCGTATTACTGTACAAGACAGTGGCTGTAACCAAGGGTGGTTGACCCCTGGGGCCAGGAAACCTGTCCACCTCTCTCAGCCTCCACCAAGGGCCCATCGTCTTCCCCCTGGCACCTCC                                                                                                                                                                                                                          |
| 112_I_GHV1-69D_I_GHJ4 | ATCACATAAACAGCCATTCTCTCTACAGAACCCCTGGGAGCACCGCTCATACCATGGACTGGACCTGGAGGTTCTCTTTGTGGTGCGGCGCAGCTACAGTGTCCAGTCCCAGGTGCAGCTGGTACAATCTGGGGCTGAAGTGAAGAAGCCTGGGCTCGTGGAAGGTCTCTGCAAGGCTTCTGGAGGCTCTTACCACCTGATGCTCACTTGGTTCGCGCAGGCCCTGGACAAGGGCTTGTAGTGGATGGAGGGCTCACCCCTGTCTTGGTTCAGCCAACCTACGACAGAAAGTTGTCGCGCAGAGTACCATTACCGCGACGAAATCGACGACACAGGGTACATGAGATGTTAGCCTGACATCCGAAGACACGGCCGTTTATTACTGTGCGAGACATGTGGACGTGTTGAGAACCTAGGCTACTTGCAGTCTGGGGCCAGGAAACCTAATAACCGTCTCTCCGCTCCACCAAGGGCCCATCGTCTTCCCCCTGGCACCTCTCTCAAGAGCACCTTGGGGCACAGCGCCCTGGGCTGCTGTCAAGGACTACTTCCCCAACCGGTGACGGTGTGCTGGAACCTCAGCGCCCTGACCAGCGCGTGCACACCTTCCCGCTGTCTACAGTCTCAGGA                                                                         |
| 112_I_GHV1-69D_I_GHJ4 | CCACATTCCTCTACAGAACCCCTGGGAGCACAGCTCATACCATGGACTGGACCTGGAGGTTCTCTTTGTGGTGCGCAGCTACAGTGTCCAGTCCCAGGTGCAGCTGGTGCAGTCTGGGGCTGAAGTGAAGAAGCCTGGGCTCGGTGAAGGTCTCTGCAAGGTCTCTGGAGGCTCTTACCACCTGATGCTCACTTGGTTCGCGCAGGCCCTGGACAAGGGCTGACTGATCGGGGACTCACCCCTGTCTTGGTTCAGCCAACCTACGACAGAAAGTTGTCGCGCAGAGTACCATTACCGCGACGAGTGCACGACACACTACATGGAGATTAGTGGACTGACATCTGAAGACACGGCCGTTTATTACTGTGCGAGACATGTGGACGTGTTGAGAATTTAGGGTACTTCCACCACTGGGGCCAGGAAACCTGGTACCGTCTCTCAGCCTCCACCAAGGGCCCATCGTCTTCCCCCTGGCACCTCTCCAAGA                                                                                                                                                                                                                        |
| 116_I_GHV3-53_I_GHJ3  | GGGAGAGGAGCCGCACTGGGATCCGAGGTGTTCCATTGCGTGATCAGCACTGAACACAGAGGACTCACCATGAGTTTTGGCTGAGTGGTTTTCTTGTCTATTCAAAGGTGTCCAGTGTGAGGTGCAGCTGGTGGAGACTGGAGAGGCTTGTATCCAGCTGGGGGCTCCCTGAGACTCTCTGTGCAAGCCTCTGGGTTCAACGTCACTAGCACTACATGAGCTGGTCCGCGAGCTCCAGGGAAAGGGCTGAGTGGTCTCACTATTATATCGTGGTACCACATACGCAAGTCCGGAAGGGCCGATTACCATCTCCAGACAAATCCAAAGAACCCCTGATCTTCAAATGAACAGCCTGAGAGCCGAGACACGGCCGTATTACTGTGCGAGAGATCCCTCTTACCGATTCCGGAGTATTACGGGGAGGGATGTTTTGATATCTGGGCAAGGACAATGTCACCGTCTCTCAGCCTCCACCAAGGGCCCATCGTCTTCCCCCTGGCACCTCTCCAAGAGCACCTCTGGGGCACAGCGCCCTGGGCTGCTGTCAAGGACTACTTCCCCAACCGGTGACGGTGTGCTGGAACCTCAGCGCCCTGACCAGCGCGTGCACACCTTCCCGCTGTCTACAGTCTCAAGGA                                                                 |
| 116_I_GHV3-53_I_GHJ3  | GGGAGAGGAGCCGCACTGGGATCCGAGGTGTTCCATTGCGTGATCAGCACTGAACACAGAGGACTCACCATGAGTTTTGGCTGAGTGGTTTTCTTGTCTATTCAAAGGTGTCCAGTGTGACGTGCAGCTGGTGGAGACTGGAGAGGCTTGTATCCAGCTGGGGGCTCCCTGAGACTCTCTGTGCAAGCCTCTGGGTTCAACGTCACTAGCACTACATGAGCTGGTCCGCGAGCTCCAGGGAAAGGGCTGAGTGGTCTCACTATTATACCGTGGTACCACATACGCAAGTCCGGAAGGGCCGATTACCATCTCCAGACAAATCCAAAGAACCCCTGATCTTCAAATGAACAGCCTGAGAGCCGAGACACGGCCGTATTACTGTGCGAGAGATCCCTCTTACCGATTCCGGAGTATTACGGGGAGGGATGTTTTGATATCTGGGCAAGGACAATGTCACCGTCTCTCAGCCTCCACCAAGGGCCCATCGTCTTCCCCCTGGCACCTCTCCAAGAGCACCTCTGGGGCACAGCGCCCTGGGCTGCTGTCAAGGACTACTTCCCCAACCGGTGACGGTGTGCTGGAACCTCAGCGCCCTGACCAGCGCGTGCACACCTTCCCGCTGTCTACAGTCTCAAGGA                                                                 |
| 117_I_GHV4-61_I_GHJ4  | ACTTCTGAGAGTCTGCACTCTGTGCAAGAACATGAACACCTGTGGTTCTCTCTCTGTTGCGCAGCTCCAGATGGTCTGTCACAGTGCAGTGCAGAGTGGGGCCAGACTGGTGAAGCCTCGGAGACCTGTCCCTCACCTGCTGTCTGTCTGTGGCTCCATCAGCGGTAGTAATTAATCTCTGAGAGTGGATCCGCGAGCCCCAGGAAAGGGACTGGAGTGGATTGGCTATATCTATCAAAATGGGAGAACCACTACAACCCCTCCCTCAAGAGTGCAGTACCATATCAGTACACAGTCCAAAGAACAGTCTCCCTGAAGCTGAGCTCTGTGACCGCTGCGGACACGGCCGTTTATTACTGTGCGAGATGAACAGTGGCTGGTACCAGTGGTCTACTGGGGCCAGGAAACCTGTCCACCGTCTCCTCAGCTCCACCAAGGGCCCATCGTCTTCCCCCTGGCACCTCTCCAAGAGCACCTCTGGGGCACAGCGCCCTGGGCTGCTGTCAAGGACTACTTCCCCAACCGGTGACGGTGTGCTGGAACCTCAGCGCCCTGACCAGCGCGTGCACACCTTCCCGCTGTCTACAGTCTCAGGA                                                                                                           |
| 117_I_GHV4-61_I_GHJ4  | ATTTCTTAAATCAGTTCCAGTCCATGACATGGAAATCTTCTGAGAGTCTGACCTCTGTGCAAGAACATGAACACCTGTGGTTCTCTCTCTGTTGCGCAGCTCCAGATGGTCTGTCACAGTGGGCTGTCCAGTGCAGCTGCAGAGTGGGGCCAGACTGGTGAAGCCTCGGAGACCTGTCCCTCACCTGCTGTCTGTCTGTGGCTCCATCAGCCTGCTGTCTGTCTGTGGTCCATCAGTGGTAGTAATTAATCTCTGAGAGTGGATCCGCGAGCCCCGGGAAAGGGACTGGAGTGGATTGGATATATTAATATAATGAGGAGAACGACTACAGCCCCCTCCGAGAGTGCAGTCCCATATCAGTACACAGTCCAAAGAACAGTCTCCCTGAAGCTGAGCTGGACACGTTCCAAGAACAGTCTCCCTGAACCTGACCTCTGTGACCGCAGCGGACACGGCCGTACTACTCTGTGCGAGATGAACAGTGGCTGGTACCGGTTGGTACTGGGGCCAGGAAACCTGGTACCCTGTCTCAGCTCCACCAAGGGCCCATCGTCTTCCCCCTGGCACCTCTCCAAGAGCACCTCTGGGGCACAGCGCCCTGGGCTGCTGTCAAGGACTACTTCCCCAACCGGTGACGGTGTGCTGGAACCTCAGCGCCCTGACCAGCGCGTGCACACCTTCCCGCTGTCTACAGTCTCAGGA |
| 118_I_GHV4-61_I_GHJ4  | GGGAAATGCTTTCTGAGAGTCTGATCTCATGTGCAAGAAATGATCCACCTGTGGTTCTCTCTGTTGCGGCTCCAGATGGTCTGTCACAGTGGTGTGAGTGGGGCCAGACTGGTGAATCCTCGGAGACCTGTCCCTCGCTGCAAGTCTTGGCGCTCCATCACCCTAGTAATTAATCTGGGGCTGGATCCGCGAGCCCCAGGAAAGGGCTGGAATGATTGCCAATATTAATATCGTGGAAATCTACCACAGCCCCTCCAGAGTGCAGTACCATATCCATTGACGCGTCAAGAAATCAGTTGCTCCGTAAGTTGAAGTCTGTGACCGCCGAGATACGCTGTACTACTGTGCGAGAGTGGGGATCCCTGGGGCTATCGTTTTGAATATTTGACCAGTGGGGCCAGGGAGCCCTGTTACCGTCTCCTCAGCTCCACCAAGGGCCCATCGTCTTCCCCCTGGCACCTCTCCAAGAGCACCTCTGGGGCACAGCGCCCTGGGCTGCTGTCAAGGACTACTTCCCCAACCGGTGACGGTGTGCTGGAACCTCAGCGCCCTGACCAGCGCGTGCACACCTTCCCGCTGTCTACAGTCTCAGGA                                                                                                             |
| 118_I_GHV4-61_I_GHJ4  | GAGGTCCACCTCATAAGGAGATGCTTCTGAGAGTCGATCTCATGTGCAAGAAATGATCCACCTGTGGTTCTCTCTGTTGCGGCTCCAGATGGTCTGTCACAGTGGTGTCCAGTGGTGTGAGTGGGGCCAGACTGGTGAATCCTCGGAGACCTGTCCCTCGCTGCAAGTCTTGGCGCTCCATCACCCTAGTAATTAATCTGGGGCTGGATCCGCGAGCCCCAGGAAAGGGCTGGAATGATTGCCAATATTAATATCGTGGAAATCTACCACAGCCCCTCCAGAGTGCAGTACCATATCCATTGACGCGTCAAGAAATCAGTTGCTCCGTAAGTTGAAGTCTGTGACCGCCGAGATACGCTGTACTACTGTGCGAGAGTGGGGATCCCTGGGGCTATCGTTTTGAATATTTGACCAGTGGGGCCAGGGAGCCCTGTTACCGTCTCCTCAGCTCCACCAAGGGCCCATCGTCTTCCCCCTGGCACCTCTCCAAGAGCACCTCTGGGGCACAGCGCCCTGGGCTGCTGTCAAGGACTACTTCCCCAACCGGTGACGGTGTGCTGGAACCTCAGCGCCCTGACCAGCGCGTGCACACCTTCCCGCTGTCTACAGTCTCAGGA                                                                                      |
| 135_I_GHV4-61_I_GHJ6  | ATACTTCTGAGAGTCTGCACTCTGTGCAAGAACATGAACACCTGTGGTTCTCTCTCTGTTGCGCAGCTCCAGATGGTCTGTCACAGTGCAGTGCAGAGTGGGGCCAGACTGGTGAAGCCTCGGAGACCTGTCCCTCACCTGCACTGTCTGTGGTCTCCGTCAGCACTAGTACTCTGACCTGGATCCGCGAGCCCCGGGAAAGACTGGAATGATTGCGTATATGATTATAGTGGAGCACCACTCTAACCCCTCTCTGAAGAGTGCAGTCACTCATACATCAGTTGACAGTCCAAAGAACCAATCTCGCTGAAGCTGACGTCTGTGACCGCTGCGGACACGGCTGATTATTGTGCGAGACAGCGAAAGTATTAACACGGTATGAGCTGTGGGCAAGGACCAAGGCTATTGTTTCTCAGCTCCACCAAGGGCCCATCGTCTTCCCCCTGGCACCTCTCCAAGAGCACCTCTGGGGCACAGCGCCCTGGGCTGCTGTCAAGGACTACTTCCCCAACCGGTGACGGTGTGCTGGAACCTCAGCGCCCTGACCAGCGCGTGCACACCTTCCCGCTGTCTACAGTCTCAGGA                                                                                                                      |



|                       |                                                                                                                                                                                                                                                                                                                                                                                                                                                                                                                                                                                                                                                                                                                        |
|-----------------------|------------------------------------------------------------------------------------------------------------------------------------------------------------------------------------------------------------------------------------------------------------------------------------------------------------------------------------------------------------------------------------------------------------------------------------------------------------------------------------------------------------------------------------------------------------------------------------------------------------------------------------------------------------------------------------------------------------------------|
| 149_I_GHV3-11_I_GHJ4  | GCTCTGGGAGAAAGCCCCAGCCCCAAGTCCCAGGAGTTCCATTCCGGTGATCAGCACTGAACACAGAGGACTCACCATGGAGTTTGGGCTGAGCTGGTTTTCTTGTGCTATTAAAAAGGTGCCAGGGTCAGGTGAGCTGGTGGGAGGCTGGTCAGCCCTGGAGGGTCCCTGAGACTCTCTGTGCAGCTCTGGATTCACTTCCAGTCACTGACTCTACATGACTCCAGTGGATCCGCGAGGCTCCAGGGAAAGGGCTGGAGTGGATGGGAGGATTGATCCTAGTACTCAACACCAACTACAGCCCGTCTTCCAAGGCCAGTCACTTCTCAGTTGACAAGTCCACCGGTAGTGTCTCCAGGGACAACGCCAGGAACCTCAGTGTCTGCAATGAACAGCCTGAGAGCCGAGGACACGGCCGTGATTACTGTGCAGAGCCATCGTTCGGGGACTCAGATCGTCTACTTGTACTGCTGGGCCAGGGAGCCCTGTCACCGTGTCTCAGCATCCCCAGCACCCCAAGGCTTCCCGCTGAGCCTCTGCAGCACCCAGCCAGATGGAACTGGTTCATCGCTCTGGTCCAGGCTTCTCCCCAGGAGCCACTCAGTGTACCTGGAGCGAAAGCGACAGGGCGTGACCCGACAACTCCC                                                |
| 15_I_GHV5-10-1_I_GHJ4 | AGTCTCCTCACCACCAGCTGGGATCTCAGGGCTTCTTTCTGTCTCTCCAGGATGGGGTCAACCCCATCTCGCCCTCCTCTGGCTTCTCCAAGGAATCTGTGCCGAAGTGCAGCTGGTGCAGTCCGGAGCAGAGGTAACAAAGCCCCGAGAGTCTCTGAGGATCTCTGTAAGACTTCTGGATAACAACCTTCCAGCTACTGGATCAACTGGGTGCGCCAGATGCCGGAAAGGCCCTGGAGTGGATGGGAGGATTGATCCTAGTACTCAACACCAACTACAGCCCGTCTTCCAAGGCCAGTCACTTCTCAGTTGACAAGTCCACCGGTAGTGTCTACTACAGTGGAGCAGCCTGAAGGCCCTCGACACCCCGGTATTACTGTGCGAGACAGGTCTCGCTATCGAGACAGGTGGTGGGGGGTGGACTTGGGGCCAGGGAACTTGTACCCGCTCTCAGCCTCCACCAAGGGCCCATCGTCTTCCCCCTGGCACCCTCTCCAAGAGCACCTCTGGGGGCACAGCGCCCTGGGCTGCTGTCAAGGACTACTCCCCAACCGGTGACGGTGTGCTGGAACCTCAGGCGCCCTGACCACGGCGGTGCACACCTTCCCGCTGTCTCAGTCTCTCAGGA                                                                   |
| 15_I_GHV5-10-1_I_GHJ4 | AGTCTCCTCACCACCAGCTGGGATCTCAGGGCTTCTTTCTGTCTCTCCAGGATGGGGTCAACCCCATCTCGCCCTCCTCTGGCTTCTCCAAGGAATCTGTGCCGAAGTGCAGCTGGTGCAGTCCGGAGCAGAGGTAACAAAGCCCCGAGAGTCTCTGAGGATCTCTGTAAGACTTCTGGATAACAACCTTCCAGCTACTGGATCAACTGGGTGCGCCAGATGCCGGAAAGGCCCTGGAGTGGATGGGAGGATTGATCCTAGTACTCAACACCAACTACAGCCCGTCTTCCAAGGCCAGTCACTTCTCAGTTGACAAGTCCACCGGTAGTGTCTACTACAGTGGAGCAGCCTGAAGGCCCTCGACACCCCGGTATTACTGTGCGAGACAGGTCTCGCTATCGAGACAGGTGGTGGGGGGTGGACTTGGGGCCAGGGAACTTGTACCCGCTCTCAGCCTCCACCAAGGGCCCATCGTCTTCCCCCTGGCACCCTCTCCAAGAGCACCTCTGGGGGCACAGCGCCCTGGGCTGCTGTCAAGGACTACTCCCCAACCGGTGACGGTGTGCTGGAACCTCAGGCGCCCTGACCACGGCGGTGCACACCTTCCCGCTGTCTCAGTCTCTCAGGA                                                                   |
| 158_I_GHV1-18_I_GHJ4  | ACCCAAAAACACACCCCTCTTGGGAGAAATCCCTAGATCACAGCTCCTCACCATGGACTGGACCTGGAGCATCTTTTCTTGGTGGCAGCAGCAACAGGTGCCACTCCCAGTTCAGCTGGTGCAGTCTGGAGCTGAGTGAAGCCTGGGCTCAGTGAAGTCTCCGCAAGACTTCTGGTACAGCTTTAACACTTATGGAATTACCTGGGTGCGACAGGCCCTGACAAGGGCTTGAATGGATGGATGGATCAGCGTCTACAATGGCAACACAACTATGCACAGAAAGTACCAGGGCAGAGTCAACATGACCACAGACACATCCACGAAACAGGCCCTACATGGAAGTCAAGGCTCAGATCTGACGACACGGCCATATATTACTGTGCGAGACAGTTTTTGGAGCGATTTCCCCAACTGGTCTTTGACTTGTGGGCCAGGGAACTTGTACCCGCTCTCAGCCTCCACCAAGGGCCCATCGTCTTCCCCCTGGCACCCTCTCAAGAGCACCTCTGGGGGCACAGCGCCCTGGGCTGCTGTCAAGGACTACTCCCCAACCGGTGACGGTGTGCTGGAACCTCAGGCGCCCTGACCACGGCGGTGCACACCTTCCCGCTGTCTCAGTCTCTCAGGA                                                                   |
| 158_I_GHV1-18_I_GHJ4  | TGGGACCCAAAAACACACCCCTCTTGGGAGAAATCCCTAGATCACAGCTCCTCACCATGGACTGGACCTGGAGCATCTTTTCTTGGTGGCAGCAGCAACAGGTGCCACTCCCAGTTCAGCTGGTGCAGTCTGGAGCTGAGTGAAGCCTGGGCTCAGTGAAGTCTCTGCAAGACTTCTGGTACAGCTTTAACACTTATGGAATTACCTGGGTGCGACAGGCCCTGACAAGGGCTTGAATGGATGGATGGATCAGCGTCTACAATGGCAACACAACTATGCACAGAAAGTACCAGGGCAGAGTCAACATGACCACAGACACATCCACGAAACACCGCTACATGGAAGTCAAGGCTCAGATCTGACGACACGGCCATATATTACTGTGCGAGACAGTTTTTGGAGCGATTTCCCCAACTGGTCTTTGACTTGTGGGCCAGGGAACTTGTACCCGCTCTCAGCCTCCACCAAGGGCCCATCGTCTTCCCCCTGGCACCCTCTCCAAGAGCACCTCTGGGGGCACAGCGCCCTGGGCTGCTGTCAAGGACTACTCCCCAACCGGTGACGGTGTGCTGGAACCTCAGGCGCCCTGACCACGGCGGTGCACACCTTCCCGCTGTCTCAGTCTCTCAGGA                                                               |
| 170_I_GHV1-8_I_GHJ5   | GCATCACTCAACAACACATCTGCTCTAGAGAAAAGCCTGTGAGCACAGCTCCTCACCATGACTGGACCTGGAGGATCCTCTTCTTGGTGGCAGCAGCTACAAGTCCCAGTCCAGTGCAGCTGGTGCAGTCTGGGGCTGAGTGAAGAAAGCCTGGGCTCAGTGAAGGCTCTGATACATCTTCAACAATATGACATCAACTGGGTGCGACAGGCCCTGGACAAGGGCTTGAAGTGGATGGGTTGATGAACCTAGTGTGACACAGCTTTCGCGAGAATCTCTGGGAGTCACTTACCAGGAACACCCCATAGGCACAGCCTACATGAGCAGCCTAACATCTGACGACACGGCCGTCTATTCTGTGCGAGAGGCTCTACGGTGTAGTCCGGCTCCTGGGGCCAGGGAACTTGTACCCGCTCTCAGCCTCCACCAAGGGCCCATCGTCTTCCCCCTGGCACCCTCTCCAAGAGCACCTCTGGGGGCACAGCGCCCTGGGCTGCTGTCAAGGACTACTCCCCAACCGGTGACGGTGTGCTGGAACCTCAGGCGCCCTGACCAGCGCGTGCAC                                                                                                                                  |
| 170_I_GHV1-8_I_GHJ5   | GGATAGTATATTGGTGCCTGAGAGCATCACTCAACAACACATCTGCTCTAGAGAAAAGCCTGTGAGCACAGCTCCTCACCATGACTGGACCTGGAGGATCCTCTTCTTGGTGGCAGCAGCTACAAGTCCCAGTCCAGTGCAGCTGGTGCAGTCTGGGGCTGAGTGAAGAAAGCCTGGGCTCAGTGAAGGCTCTGCAAGGCTTCTGATACATCTTCAACAATATGACATCAACTGGGTGCGACAGGCCCTGGACAAGGGCTTGAAGTGGATGGGTTGATGAACCTAGTGTGACACAGCTTTCGCGAGAATCTCTGGGAGTCACTTACCAGGAACACCCCATAGTACAGCCTACATGAGCTGAGCAGCCTAACATCTGACGACACGGCCGTATTCTGTGCGAGAGGCTCTACGGTGTAGTCCGGCTCCTGGGGCCAGGGAACTTGTACCCGCTCTCAGCCTCCACCAAGGGCCCATCGTCTTCCCCCTGGCACCCTCTCCAAGAGCACCTCTGGGGGCACAGCGCCCTGGGCTGCTGTCAAGGACTACTCCCCAACCGGTGACGGTGTGCTGGAACCTCAGGCGCCCTGACCAGCGCGTGCACACCTTCCCGCTGTCTCAGTCTCTCAGGA                                                                  |
| 170_I_GHV1-8_I_GHJ5   | GTTTTATATGGGATCACTCAACAACACATCTGCTCTAGAGAAAAGCCTGTGAGCACAGCTCCTCACCATGACTGGACCTGGAGGATCCTCTTCTTGGTGGCAGCAGCTACAAGTCCCAGTCCAGTGCAGCTGGTGCAGTCTGGGGCTGAGTGAAGAAAGCCTGGGCTCAGTGAAGGCTCTGCAAGGCTTCTGATACATCTTCAACAATATGACATCAACTGGGTGCGACAGGCCCTGGACAAGGGCTTGAAGTGGATGGGTTGATGAACCTAGTGTGACACAGCTTTCGCGAGAATCTCTGGGAGTCACTTACCAGGAACACCCCATAGTACAGCCTACATGAGCTGAGCAGCCTAACATCTGACGACACGGCCGTATTCTGTGCGAGAGGCTCTACGGTGTAGTCCGGCTCCTGGGGCCAGGGAACTTGTACCCGCTCTCAGCCTCCACCAAGGGCCCATCGTCTTCCCCCTGGCACCCTCTCCAAGAGCACCTCTGGGGGCACAGCGCCCTGGGCTGCTGTCAAGGACTACTCCCCAACCGGTGACGGTGTGCTGGAACCTCAGGCGCCCTGACCAGCGCGTGCACACCTTCCCGCTGTCTCAGTCTCTCAGGA                                                                               |
| 170_I_GHV1-8_I_GHJ5   | ACCGATTTCTATATGGGATCACTCAACAACACATCTGCTCTAGAGAAAAGCCTGTGAGCACAGCTCCTCACCATGACTGGACCTGGAGGATCCTCTTCTTGGTGGCAGCAGCTACAAGTCCCAGTCCAGTGCAGCTGGTGCAGTCTGGGGCTGAGTGAAGAAAGCCTGGGCTCAGTGAAGGCTCTGCAAGGCTTCTGATACATCTTCAACAATATGACATCAACTGGGTGCGACAGGCCCTGGACAAGGGCTTGAAGTGGATGGGTTGATGAACCTAGTGTGACACAGCTTTCGCGAGAATCTCTGGGAGTCACTTACCAGGAACACCCCATAGTACAGCCTACATGAGCTGAGCAGCCTAACATCTGACGACACGGCCGTATTCTGTGCGAGAGGCTCTACGGTGTAGTCCGGCTCCTGGGGCCAGGGAACTTGTACCCGCTCTCAGCCTCCACCAAGGGCCCATCGTCTTCCCCCTGGCACCCTCTCCAAGAGCACCTCTGGGGGCACAGCGCCCTGGGCTGCTGTCAAGGACTACTCCCCAACCGGTGACGGTGTGCTGGAACCTCAGGCGCCCTGACCAGCGCGTGCACACCTTCCCGCTGTCTCAGTCTCTCAGGA                                                                          |
| 176_I_GHV3-33_I_GHJ5  | GCTCCTCTACTGATGAAACCCAGCCCAGCCCTGACCCTGCAGCTGGGAGACGAGCCGACTGGAAGTGCAGGTTTCCATTCCGGTGATCATCACTGAACACAGAGGACTCACCATGGAGTTTGGGCTGAGCTGGTTTTCTTCTGTTTCTTTAAGAGGTGCCAGTGCAGCTGGTGGAGTCTGGGGAGGGTGGTCCAGCCTGGGAGGCCACAGACTCTCTGTGCAGCTCTGATTCACTTCACTTCACTTCACTGGGCTCCGCGAGCTCCAGGCAAGGGCCTGGAATGGTGGCATTATATACATGATGGAAGTAATAGTATTACGAGACTCCGTGAAGGGCCGATTATCATCTCCAGAGACAATCCAAAGAAACAGTTTATCTGCAAAATGACAGCCTGAGAAGTGAAGACAGGCTGTATATTACTGTGCGAGAATCCACAGCGACAGGGGGTAGGAGACCCGGTAGCTCCGGTGGCGAACACTGGTTGACCCCTGGGCCAGGGAGTCTGTCAACGCTCTCTCAGCCTCCACCAAGGGCCCATCGTCTTCCCCCTGGCACCCTCTCCAAGAGCACCTCTGGGGGCACAGCGCCCTGGGCTGCTGTCAAGGACTACTCCCCAACCGGTGACGGTGTGCTGGAACCTCAGGCGCCCTGACCAGCGCGTGCACACCTTCCCGCTGTCTCAGTCTCTCAGGA |

|                      |                                                                                                                                                                                                                                                                                                                                                                                                                                                                                                                                                                                                                                                                                                                                                             |
|----------------------|-------------------------------------------------------------------------------------------------------------------------------------------------------------------------------------------------------------------------------------------------------------------------------------------------------------------------------------------------------------------------------------------------------------------------------------------------------------------------------------------------------------------------------------------------------------------------------------------------------------------------------------------------------------------------------------------------------------------------------------------------------------|
| 176_I_GHV3-33_I_GHJ5 | CCCTCTACTGATGAAAACCAGCCCAGCCCTGACCCTGACGCTCTGGGAGACGAGCCCAGCACTGGAAGTCGCCGTGTTCCATTCCGCTGATCATCACTGAAACACAGAGGACTCACCATTGGAGTTTGGCTGAGCTGGTTTTCTCGTAGTCTTTAAGAGGTGTCCAATG<br>CAGGTGACGCTGGTGGAGTCTGGGGAGGGGTGGTCCAGCTGGAGGTCACACAGACTCTCTGTGACGCTCTGATTACCTCAGTAGTTATGCTTCCACTGGGCCAGGCTCCAGGCAAGGGCTGGAATGGTGGCATTATATCATATATGGAAGTAAT<br>AAGTACTTCGCAGACTCCGTGAAGGGCCGATTCCACATCTCCAGAGACAATCCAAGAATACAGTTTATCTGCAAAATGAACAGCCTGAGAAGTGAAGACACGCTGTCTATTACTGTGCGAGAAATACCCACGACGCGGAGGGGTAGGAGACCCGGTAGCTCCCGGTCCGC<br>GAACAACCTGTTGACCCCTGGGGCAGGAGCCCTGCTCACCCTCTCCTCAGCTCCACCAAGGGCCCATCGTCTCCCCCTGGCACCTCTCCAAGAGCACCTCTGGGGGCACAGCGGCCCTGGCTGCTGCTCAAGGACTACTTCCCCAACCCGGTACGCGTGTGCT<br>GGAACCTCAGCGCCCTGACCAGCGCGTGCACACCTTCCCGCTGCTCTACAGTCTCAGGA |
| 18_I_GHV1-8_I_GHJ4   | CTGAGAGCATCACTCAACAACACATCTGTCTCTAGAGAAAACCTGTGAGCACAGCTCCTCACCATTGGACTGGACCTGGAGATTCTCTTCTGGTGGCAGCAGCTACAAGTCCCACGCCAGGTGCAACTGGTGCAGTCTGGGGCTGAGGTGAAGAAGCTGGGGCTCA<br>GTGAAGGTCTCTGCGAGGCTTCTGGATACACCTTCACTCATTACGATGCAACTGGTGGCAGACGCGCTGGACAAGGGCTTGAAGTGGTGGCCTGGATGAACCTAATAGTGGCAATACCCCTATGACACAGAACTCCAGGGCAGAGTTACCTTGACCCGGAAACCTCC<br>CCTAAGCACAGCCTACATGAGCTCAACACCTGAGGTCTGAGGACACGCGCGTATTACTGCGCGAGCCACCTCGTTCATTCTCTGTTGGGGACTTTTTCAACCCTTTCTACTGGGTGAGGGACCCCTGGTACCCGTCTCCTCAGCTCCACCAAGGGCCCAT<br>CGGCTTCCCCCTGGCACCTCTCCAAGAGCACCTCTGGGGGCACAGCGCCCTGGCTGCTGTTCAAGGACTACTTCCCCAACCCGGTACGCGTGTGCTGGAACCTCAGCGCCCTGACCAGCGCGTGCACACCTTCCCGCTGCTCTACAGTCTCAGGA                                                                        |
| 18_I_GHV1-8_I_GHJ4   | GGGGATCACTCAACAACACATCTGTCTCTAGAGAAAACCTGTGAGCACAGCTCCTCACCATTGGACTGGACCTGGAGATTCTCTTCTGGTGGCAGCAGCAACAAGTCCCACGCCAGGTGCAACTGGTGCAGTCTGGGGCTGAGGTGAAGAAGCTGGGGCTCAGT<br>GAAGGTCTCTGCAAGGCTTCTGGATACACCTTCACTCATTATGATATCAACTGGTGGCAGACGCGCTGGACAAGGGCTTGAAGTGGTGGCCTGGATGAACCTAATAGTGGCAATACCCCTATGACACAGAACTCCAGGGCAGAGTTACCTTGACCCGGAAACCTCC<br>TAAGCACAGCCTACATGAGCTCAACACCTGAGGTCTGAGGACACGCGCGTATTACTGCGCGAGCCACCTCGTTCATTCTCTGTTGGGGACTTTTTCAACCCTTTCTACTGGGTGAGGGACCCCTGGTACCCGTCTCCTCAGCTCCACCAAGGGCCCATCG<br>GTCTTCCCCCTGGCACCTCTCCAAGAGCACCTCTGGGGGCACAGCGCCCTGGCTGCTGTTCAAGGACTACTTCCCCAACCCGGTACGCGTGTGCTGGAACCTCAGCGCCCTGACCAGCGCGTGCACACCTTCCCGCTGCTCTACAGTCTCAGGA                                                                            |
| 182_I_GHV3-48_I_GHJ4 | AGCTCTCAGAGAGTGCTTAGCCCTGATTCCAAGCAITTCACCTGTGTATCAGCACTGAACACAGAGGACTCACCATTGGAGTTGGGCTGTCTGGTTTTCTTGTGTTCTTTTGAAGATGTCAGTGTGAGTGCAGCTGGTGGAGTCTGGGGAGGCTTGTG<br>ACAGCTGGAGGCTCCCTGAGACTCTCTGTGACAGCTCTGATTCACTTTCAGTAGTTTTAAATGAACCTGGTCCGCGAGGCTCCAGGGAAGGGCTGGAGTGGATTTCATACATTAGTAGTAGTGTAGTACCATATACTACGACACTCTGTGAAGGGCCGATTACCA<br>TCTCCAGAGACAACGCAAAGAACTCACTGTATCTGCAAAATGAACAGCCTGAGAGCCGAGGACACGCTATTTTACTGTGCGAGAGATGTATCGAACCGGATACAACCTATGAGTTTCCCCACTACTTACCAGTGGCCAGGAAACCTGGTACCCGTCTCCAGGGAG<br>TGCATCCGCCAACCTTTTCCCCCTGCTCCTGTGAGAAATCCCCGTCGATACGAGCAGCGT                                                                                                                                                                            |
| 182_I_GHV3-48_I_GHJ4 | AGCTCTCAGAGAGTGCTTAGCCCTGATTCCAAGCAITTCACCTGTGTATCAGCACTGAACACAGAGGACTCACCATTGGAGTTGGGCTGTCTGGTTTTCTTGTGTTCTTTTGAAGATGTCAGTGTGAGTGCAGCTGGTGGAGTCTGGGGAACTTGTG<br>ACAGCTGGAGGCTCCCTGAGACTCTCTGTACAGCTCTGATTCACTTTCAGTAGTTTTAAATGAACCTGGTCCGCGAGGCTCCAGGGAAGGGCTGGAGTGGATTTCATACATTAGTAGTAGTGTAGTACCATATACTACGACACTCTGTGAAGGGCCGATTACCA<br>TCTCCAGAGACAACGCAAAGAACTCACTGTATCTGCAAAATGAACAGCCTGAGAGCCGAGGACACGCTATTTTACTGTGCGAGAGATGTATCGAACCGGATACAACCTATGAGTTTCCCCACTACTTACCAGTGGCCAGGAAACCTGGTACCCGTCTCCAGGGAG<br>CACCAGGGCCCATCGTCTTCCCCCTGACCCCTCTCCAAGAGCACCTCTGGGGGCACAGCGCCCTGGCTGCTGTTCAAGGACTACTTCCCCAACCCGGTACGCGTGTGCTGGAACCTCAGCGCCCTGACCAGCGCGTGCACACCTTCCCGCTGCTCTACAGTCTCAGGA                                                                  |
| 183_I_GHV3-30_I_GHJ4 | GAGCTCTGGGAGAGAGCCAGCACTAGAAAGTCGGCGGTGTTCCATTCCGCTGATCAGCACTGAACACAGAGGACTCACCATTGGAGTTTGGGCTGAGCTGGTTTTCTCGTCTCTTTAAGAGGTGTCCAGTGTGAGTGTGAGTCTGGGGAGGCGT<br>GGTCCAGCTGGGAAGTCCCTGAGACTCTCTGTGACGCTCTCGATTCACTTTCAGTAGTATGATCATGACTGGTCCGCGAGGCTCCAGGCAAGGGCTGGAGTGGTGGCGATTATTTAGATGATGGAATAAAAAATATATGAGGACTCCGTGAAGGGCCGATTCA<br>CCATCTCCAGAGACAATCCAGGAACAGCTGTATTGCAATTGAACAGCCTGAGAAATGAGGACACGCGTGTATTATTGTGCGAAAGGGCCGCTCCACTACTATGTTGCGGGGACTAATGATTGGGCCAGGGAACCCCTAGTACCCTCTCCTCAGCTCCACCAAGG<br>GCCATCGTCTTCCCCCTGGCACCTCTCCAAGAGCACCTCTGGGGGCACAGCGCCCTGGCTGCTGTTCAAGGACTACTTCCCCAACCCGGTACGCGTGTGCTGGAACCTCAGCGCCCTGACCAGCGCGTGCACACCTTCCCGCTGCTCTACAGTCTCAGGA                                                                               |
| 183_I_GHV3-30_I_GHJ4 | GGGAGAGAGCCAGCACTAGAAAGTCGGCGGTGTTCCATTCCGCGATCAGCACTGAACACAGAGGACTCACCATTGGAGTTTGGGCTGAGCTGGTTTTCTCGTCTCTTTAAGAGGTGTCCAGTGTGAGTGTGAGTCTGGGGAGGCGTGTCCAG<br>CCTGGGAAGTCCCTGAACTCTCATGTGACGCTCTCGATTCAATTTCACTTCTATGCCATGCACTGGTCCGCGAGGCTCCAGGCAAGGGCTGGAGTGGTGCACAATATTTCAAATGATGGAACGAAAAATTTATGAGGACTCCGTGAAGGGCCGATTACCATCTCCA<br>GAGACAATCCAGGAACACCCTGTATCTGCAATTGAACAGCCTGAGGGTTGAGGACACGCGTGTCTATTACTGTGCGAAAGAGGGCCCTCCACTACTATGTTGCGGGGACTAATGATTGGGCCAGGGAACCCCTGTCACCGTCTCCTCAGCTCCACCAAGGGCCCATCG<br>GTCTTCCCCCTGGCACCTCTCCAAGAGCACCTCTGGGGGCACAGCGCCCTGGCTGCTGTTCAAGGACTACTTCCCCAACCCGGTACGCGTGTGCTGGAACCTCAGCGCCCTGACCAGCGCGTGCACACCTTCCCGCTGCTCTACAGTCTCAGGA                                                                                |
| 195_I_GHV3-23_I_GHJ4 | AGCTCTGAGAGAGAGCCAGCCCTGGGATTTTTCAGGTGTTTTCACTTGGTGTATCAGCACTGAACACAGAGAACTCACCATTGGAGTTTGGGCTGAGCTGGCTTTCTTGTGGCTATTTAAGAGGTGTCCAGTGTGAGTGTGAGTCTGGGGAGGCTTGG<br>TACAGCCGGGGGCTCCCTGAGAGTTTCTGTGTTGCTCTGATTGACCTTTAACCACTATGCTTGAATGGTCCGCGAGGCTCCAGGGAAGGGCTGGAGTGGTCTCCGCTATTAGTGTAGTGTACTATGACGACTACGCACTCCGTGAAGGGCCGTTCA<br>CCGTCTCCAGAGACAACCTAAGAAACACATTATATCTGCAACTGAACAGCCTGCGAGTGAAGGACACGCGCTTTTACTGTGCGAAAGGGGGCAGCAGTGTGCTGCCACTACTTTGAATCTGGGCCAGGGAACCCCTGGTACCCGTCTCCTCAGCTCCACCAAGGGCCCATCG                                                                                                                                                                                                                                              |
| 195_I_GHV3-23_I_GHJ4 | GAGAGAGAGCCAGCCCTGGGATTTTTCAGGTGTTTTCACTTGGTGTATCAGCACTGAACACAGAGAACTCACCATTGGAGTTTGGGCTGAGCTGGCTTTCTTGTGGCTATTTAAGAGGTGTCCAGTGTGAGTGTGAGTCTGGGGAGGCTTGGTACAGC<br>CGGGGGGCTCCTGAGAGTTTCTGTGACGCTCTGATTGACCTTTAACCACTATGCTTGAATGGTCCGCGAGGCTCCAGGGAAGGGCTGGAGTGGTCTCAGCCATTAGTGTAGTGTCTATGACATACTACGCACTCCGTGAAGGGCCGTTACCCGTCT<br>CCAGAGACAACCTCCAAGAACACCTGTATCTGCAACTGAACAGCCTGCGAGCAGGAGGACACGCGCAATTTACTGTACGAAAGGGGGCAGCAGTGTGTTCCACTACTTTGAATCTGGGGCCAGGGAACCCCTGGTACCCGTCTCCTCAGCTCCACCAAGGGCCCATCG<br>CTTCCCCCTGGCCCTGCTCCAGAGCACCTCCGAGACACAGCGCCCTGGCTGCTGTTCAAGGACTACTTCCCCAACCCGGTACGCGTGTGCTGGAACCTCAGCGCTCTGACCAGCGCGTGCACACCTTCCAGCTGCTCTACAGTCTCAGGA                                                                                        |
| 198_I_GHV3-23_I_GHJ4 | AGCTCTGAGAGAGAGCCAGCCCTGGGATTTTTCAGGTGTTTTCACTTGGTGTATCAGCACTGAACACAGAGAACTCACCATTGGAGTTTGGGCTGAACTGGCTTTTCTTGTGGCTATTTAAGAGGTGTCCAGTGTGAGTGTGAGTCTGGGGAGTCTTGG<br>TACAGCCTGGGGTCCCTGAGACTCTCTGTGACGCTCTGATTCACTTTAGCAGTATGCCATGAGTTGGTCCGCGAGGCTCCAGGGAAGGGCTGGAGTGGTCTCAACTATTAGTGTAGTGTGGTGTAGCACATACTACGCACTCCGTGAAGGGCCGTTCA<br>CCGTCTCCAGAGACAGTTCCAAGAACACGCTGTATCTGCAAAATCAATAGCCTGAGAGTGAAGGACACGCGCTATATTACTGTGCGAAAGCCCCCGACACTCTGGTCTATTTGATTATTGGGCCAGGGAACCCCTGGTACCCGTCTCCTCAGCTCCACCAAGGGCCCATC<br>GGTCTTCCCCCTGGCACCTCTCCAAGAGCACCTCTGGGGGCACAGCGCCCTGGCTGCTGTTCAAGGACTACTTCCCCAACCCGGTACGCGTGTGCTGGAACCTCAGCGCTCTGACCAGCGCGTGCACACCTTCCCGCTGCTCTACAGTCTCAGGA                                                                              |

|                      |                                                                                                                                                                                                                                                                                                                                                                                                                                                                                                                                                                                                                                                                              |
|----------------------|------------------------------------------------------------------------------------------------------------------------------------------------------------------------------------------------------------------------------------------------------------------------------------------------------------------------------------------------------------------------------------------------------------------------------------------------------------------------------------------------------------------------------------------------------------------------------------------------------------------------------------------------------------------------------|
| 198_I_GHV3-23_I_GHJ4 | AGCTCTGAGAGAGAGCCAGCCCTGGGATTTTCAGGTGTTTTATTGGTGATCAGGACTGAACAGAGAGAAGTACCATTGAGTTGGGCTGAGCTGGCTTTTTCTGTGACTATTTAAAGGTGCCAGTGTGGGGTGACGCTGGTGGAGTCTGGGGAGGCTTGGTACAGCCTGGGGGCTCCTGAGACTCTCTGTGCAGCCTCTGGATTGATTGATCTTTAGCGACCATGCCCTGACCTGGTCCGCGAGGCTCCAGGGAAGGGAAGTGGGCTGAGTGGGCTCAACTATTAGTGGTAGTGGTAGCACATATTATGCAAACTCCGTGAGGGCCGGTTCCACGTTTCCAGAGACAGGTCCAAGAACACGCTGTATCTGCAGATGAATAGCCTGAGAGTCGAGGACACGCGCCGTATATTACTGTGCGAAAGCCCCCGGACCTCTGGTCTTATTTGATTATTGGGGCCAGGGAACCTGGTATCTGCTCCCTCAGCCTCCACCAAGGCCCATCGTCTCCCCCTGGCACCTCTCCAAGAGCACCTCTGGGGCACAGCGCCCTGGGCTG                                                                                                 |
| 198_I_GHV3-23_I_GHJ4 | AGCTCTGAGAGAGAGCCAGCCCTGGGATTTTCAGGTGTTTTATTGGTGATCAGGACTGAACAGAGAGAAGTACCATTGAGTTGGGCTGAGCTGGCTTTTTCTGTGACTATTTAAAGGTGCCAGTGTGGGGTGACGCTGGTGGAGTCTGGGGAGGCTTGGTACAGCCTGGGGGCTCCTGAGACTCTCTGTGCAGCCTCTGGATTGATTGATCTTTAGCGACCATGCCCTGACCTGGTCCGCGAGGCTCCAGGGAAGGGAAGTGGGCTGAGTGGGCTCAACTATTAGTGGTAGTGGTAGCACATATTATGCAAACTCCGTGAGGGCCGGTTCCACGTTCCAGTACAGAGCCTCCAAGAACACGCTGTATCTGCAAAATGAATAGCCTGAGAGTCGAGGACACGCGCCGTATATTACTGTGCGAAAGCCCCCGGACCTCTGGTCTTATTTGATTATTGGGGCCAGGGAACCTGGTATCTGCTCCCTCAGCCTCCACCAAGGCCCATCGTCTCCCCCTGGCACCTCTCCAAGAGCACCTCTGGGGCACAGCGCCCTGGGCTGCTGTCAAGGACTACTTCCCGAACCGGTGACGGTGTCTGTGAACTCAGGCGCCCTACCAGCGCGTGACACCTTCCCGCTGTCTACAGTCTCAGGA |
| 198_I_GHV3-23_I_GHJ4 | CTCTGAGAGAGAGCCAGCCCTGGGATTTTCAGGTGTTTTATTGGTGATCAGGACTGAACAGAGAGAAGTACCATTGAGTTGGGCTGAACTGGCTTTTTCTGTGCTATTTAAAGGTGCCAGTGTGAGGTGCAACTGGTGGAGTCTGGGGAGTCTTGGTACAGCCTGGGGGCTCCTGAGACTCTCCTGTGCAGCCTCTGGATTGATTGATCTTTAGCGACCATGCCCTGACCTGGTCCGCGAGGCTCCAGGGAAGGGCTGGAGTGGGCTCAACTATTAGTGGTAGTGGTAGCACATATTATGCAAACTCCGTGAGGGCCGGTTCCACGTTCCAGAGACAGTCCAAGAACACGCTGTATCTGCAAAATGAATAGCCTGAGAGTCGAGGACACGCGCCGTATATTACTGTGCGAAAGCCCCCGGACCTCTGGTCTTATTTGATTATTGGGGCCAGGGAACCTGGTACCTCTCCACCAAGGCCCATCGTCTCCCCCTGGCACCTCTCCAAGAGCACCTCTGGGGCACAGCGCCCTGGGCTGCTGTCAAGGACTACTTCCCGAACCGGTGACGGTGTCTGTGAACTCAGGCGCCCTACCAGCGCGTGACACCTTCCCGCTGTCTACAGTCTCAGGA                       |
| 199_I_GHV1-46_I_GHJ5 | CCCTGAAAGCATCATCCAACAACACATCCCTTCTCCACAGAAAGCCTCTGAGAGAAAGTCTTACCATTGACTGACCTGGAGGCTTCTGCTTCTGCTGTAGCTTCCAGGCTCCTACTGCCAGTGTGAGTGTGAGTGTGAGGCTGGGCTGAGGTGAAGAACCTGGGGCTTCAGTGAAGATTTCTGCGAGCTTCTGATTACGTTACCCAGGTTCTATATGCACTGGCTGCGACAGGCCCTGGACAAGGGCTGAGTGGATGGGAATAATCAACCTAGTGGAGTAGAACAACTACGCACAGAGTTCCAGGGCAGAGTCCAGGGCAGAGTCCATGACCAGGACTGTCCGCGACTGTCCGCGAGCACAGTTTTCATGGAGTTGAGCAGCCTGACATCTGAAGACACGCGCGTATTTTTGTCGGGAGCCGCTGTCGGGGCTGTAGTGTGCGGATTGACCCCTGGGGCCAGGGAACCTGGTATCTCTCCTCAGCCTCCACCAAGGCCCATCGTCTCCCCCTGGCACCTCTCCAAGAGCACCTCTGGGGCACAGCGCCCTGGGCTGCTGTCAAGGACTACTTCCCGAACCGGTGACGGTGTCTGTGAACTCAGGCGCCCTACCAGCGCGTGACACCTTCCCGCTGTCTACAGTCTCAGGA   |
| 199_I_GHV1-46_I_GHJ5 | ATCATCCAACAACACATCCCTTCTCCACAGAAAGCCTCTGAGAGAAAGTCTTACCATTGACTGACCTGGAGGCTTCTGCTTCTGCTGTAGCTTCCAGGCTCCTACTGCCAGTGTGAGTGTGAGTGTGAGGCTGGGCTGAGGTGAAGAACCTGGGGCTCAGTGAAGATTTCTGCGAGCTTCTGATTACGTTACCCAGGTTCTATATGCACTGGCTGCGACAGGCCCTGGACAAGGGCTGAGTGGATGGGAATAATCAACCTAGTGGAGTAGAACAACTACGCACAGAGTTCCAGGGCAGAGTCCATGACCAGGACTGTCCGCGAGCACAGTTTTCATGGAGTTGAGCAGCCTGACATCTGAAGACACGCGCGTATTTTTGTCGGGAGCCGCTGTCGGGGCTGTAGTGTGCGGATTGACCCCTGGGGCCAGGGAACCTGGTATCTCTCCTCAGCCTCCACCAAGGCCCATCGTCTCCCCCTGGCACCTCTCCAAGAGCACCTCTGGGGCACAGCGCCCTGGGCTGCTGTCAAGGACTACTTCCCGAACCGGTGACGGTGTCTGTGAACTCAGGCGCCCTACCAGCGCGTGACACCTTCCCGCTGTCTACAGTCTCAGGA                                    |
| 201_I_GHV4-59_I_GHJ5 | ATACTTCTGAGAGTCTGACTCCTGTGCAAGAACATGAACATCTGTGGTTCTTCTTCTCCTGTGGCAGCTCCAGATGGTCTGTCACAGTGTGAGTGTGAGGAGTGGGGCCCGGACTGGTGAAGCCTTCCAGAGACCTGTCCCTCACCTGACTGTCTGTGGTCTCCATGACTAATTACTACTGAGCTGGATCCGCGAGCCCCAGGGAAGGGACTGGAGTGGATTGGGAATATCTTACAGTGGGAGTACCAGCTACAACCCCTCCCTCCAGAGTCCAGTACCATATCGTAGACACGTCCAAGAACAGTTCCCTGAACCTGACTGTCTGCTGCTGACCGCTGCGACACGCGCGTATATTACTGTGCGAGATTGACACGCGCGAGTGGCTGTGGGCGCGGAGTCTGTGGGGTGGTTCGACCCCTGGGGCCAGGGAATCCTGTCTCCACAGCCTCCACCAAGGCCCATCGTCTCCCCCTGGCACCTCTCCAAGAGCACCTCTGGGGCACAGCGCCCTGGGCTGCTGTCAAGGACTACTTCCCGAACCGGTGACGGTGTCTGTGAACTCAGGCGCCCTACCAGCGCGTGACACCTTCCCGCTGTCTACAGTCTCAGGA                                          |
| 201_I_GHV4-59_I_GHJ5 | ATACTTCTGAGAGTCTGACTCCTGTGCAAGAACATGAACATCTGTGGTTCTTCTTCTCCTGTGGCAGCTCCAGATGGTCTGTCACAGTGTGAGTGTGAGGAGTGGGGCCCGGACTGGTGAAGCCTTCCAGAGACCTGTCCCTCACCTGACTGTCTGTGGTCTCCATGACTAATTACTACTGAGCTGGATCCGCGAGCCCCAGGGAAGGGACTGGAGTGGATTGGGAATATCTTACAGTGGGAGTACCAGCTACAACCCCTCCCTCCAGAGTCCAGTACCATATCGTAGACACGTCCAAGAACAGTTCCCTGAACCTGACTGTCTGCTGCTGACCGCTGCGACACGCGCGTATATTACTGTGCGAGATTGACACGCGCGAGTGGCTGTGGGCGCGGAGTCTGTGGGGTGGTTCGACCCCTGGGGCCAGGGAATCCTGTCTCCACAGCCTCCACCAAGGCCCATCGTCTCCCCCTGGCACCTCTCCAAGAGCACCTCTGGGGCACAGCGCCCTGGGCTGCTGTCAAGGACTACTTCCCGAACCGGTGACGGTGTCTGTGAACTCAGGCGCCCTACCAGCGCGTGACACCTTCCCGCTGTCTACAGTCTCAGGA                                          |
| 202_I_GHV1-18_I_GHJ4 | ACCCAAAACACACCCCTCCTTGGGAGAAATCCCTAGATCACAGCTCCTCACATGACTGACCTGGAGCATCCTTTTTCTTGGTGGCAGCAACAGAGTGTCACTCCAGGTTCAACTGGTGCAGTCTGGAGGTGAGGTGAAGAACCTGGGGCTCAGTAAAGTCTCTGCAAGGCTGCTGTACACCTTCAACAATATGGGATCAGCTGGTGCAGGCCCCCTGACAAGGACTCGAATGGATGGATGATCAGTGGTACAATGTTACACACTATATGCTCAGAAATCCAGGGCAGAGTACCATGACCAGACACATCCACGAACACAGCCTACATGGAAGTAAAGGACGTCAAATCTGACGACACGCGCGTCTATTACTGCGCGAGATTGGGGAGATACTACGAACCTGACTATTGGGGCCAGGGAACCTGGTCAACCTCTCCTCAGCCTCCACCAAGGCCCATCGTCTCCCCCTGGCACCTCTCCAAGAGCACCTCTGGGGCACAGCGCCCTGGGCTGCTGTCAAGGACTACTTCCCGAACCGGTGACGGTGTCTGTGAACTCAGGCGCCCTACCAGCGCGTGACACCTTCCCGCTGTCTACAGTCTCAGGA                                                 |
| 202_I_GHV1-18_I_GHJ4 | TGGGACCCAAAGAACACACCCCTCCTTGGGAGAAATCCCTAGATCACAGCTCCTCACCATTGACTGACCTGGAGCATCCTTTTTCTTGGTGGCAGCAACAGAGTGTCACTCCAGGTTCAACTGGCAGTCTGGAGGTGAGGTGAAGAACCTGGGGCTCAGTAAAGTCTCTGCTCCTGCAAGGCTGCTGTTACACCTTCAACAATACCGTGTGCTGAGTGGTGCAGGCCCCCTGACAAGGACTCGAATGGATGGATGATCAGTGGTACAATGTTACACACTATATGCTCAGAAATCCAGGGCAGAGTACCATGACCAGACACATCCACGAATACAGCCTACATGGAATGAAGGAGCGTCAAATCTGACGACACGCGCGTCTATTACTGCGCGAGATTGGGGAGATACTACGAACCTGACTATTGGGGCCAGGGAACCTGGTCAACCTCTCCTCAGCCTCCACCAAGGCCCATCGTCTCCCCCTGGCACCTCTCCAAGAGCACCTCTGGGGCACAGCGCCCTGGGCTGCTGTCAAGGACTACTTCCCGAACCGGTGACGGTGTCTGTGAACTCAGGCGCCCTACCAGCGCGTGACACCTTCCCGCTGTCTACAGTCTCAGGA                                  |
| 210_I_GHV1-46_I_GHJ6 | GGGCCCTGAAAGCATCATCCAACAACACATCCCTTCTCACAGAAAGCCTCTGAGAGAAAGTCTTACCATTGACTGACCTGGAGGCTTCTGCTTCTGCTGTAGTCCAGTGTCTACTCCAGTGTGAGTGGGCTGAGGTGAAGAACCTGGGGCTCAGTGAAGGTTCTCCTGCAAGCATCTGGTACACCTTCAACGACTTCTATTTCCACTGGTGCAGACAGGCCCTGGACAAGGCTTGTAGTGTGATGGGAATGATCAACCTAGTGTACCACAAATACGCACAGAGTTCCAGGGCAGAGTACCATGACCAGGACACGACGCTCAACGAGCCTGCTACATGAGCTGAGCAGCCTGAGATCTGAGGACACGCGCATGATTTTTGTGCGAGATAAAGGCCAGCTCTCTTCTACGTTTTGACGCTCTGGGGCCAGGGAACCTGGTCAACCTCTCCTCAGCCTCCACCAAGGCCCATCGTCTCCCCCTGGCACCTCTCCAAGAGCACCTCTGGGGCACAGCGCCCTGGGCTGCTGTCAAGGACTACTTCCCGAACCGGTGACGGTGTCTGTGAACTCAGGCGCCCTACCAGCGCGTGACACCTTCCCGCTGTCTACAGTCTCAGGA                                   |

|                      |                                                                                                                                                                                                                                                                                                                                                                                                                                                                                                                                                                                                                                                                     |
|----------------------|---------------------------------------------------------------------------------------------------------------------------------------------------------------------------------------------------------------------------------------------------------------------------------------------------------------------------------------------------------------------------------------------------------------------------------------------------------------------------------------------------------------------------------------------------------------------------------------------------------------------------------------------------------------------|
| 210_I_GHV1-46_I_GHJ6 | ATCATCCAACAACCACATCCCTTCTACAGAACCTCTGAGAGAAAGTTCTCACCATTGACTGGACCTGGAGGGTCTTCTGCTTGGCTGTAGCTCCAGGTGCTCACTCCCAGGTGCAGCTGGTGAGTCTGGGGCTGAGGTGAAGAAGCCTGGGGCTCAGTGAAGTTTCTCTGCAAGGCTGAATACACCTTACCACCTTCTAATTCACCTGGGTGCGACAGGCCCTGGACAGGGCTTGGAGTGGGAATGATCAACCTAGTAGTGACCACAAATACGCACAGCTCCAGGGCAGAGTACCATTGACCAGGACACGTCCACGACCAGTGCTACATGGAGCTGAGCAGCTGAGATCTGAGGACACGGCCATGTATTACTGTGCGAGATAAGGCCACGTCTTCTACGGTTTGGACGTCTGGGCCAAGGACCACGTCCACCTCTCTCAGCTCCACCAAGGCCCATCGTCTTCCCCTGGCACCTCTCCAAAGCACCTCTGGGGCACAGCGCCCTGGCTGCTGCTCAAGGACTACTTCCCCAACCGGTACGGTGTGCTGGAACCTCAGCGCCCTGACCAGCGCGTGCACACTTCCCGCTGTCTACAGTCTCAGGA                                        |
| 212_I_GHV1-2_I_GHJ4  | CAACCACATCTGTCTCTAGAGAAAACCTGTGAGCACAGCTCCTCACCATTGACTGGACCTGGAGGATTCTTCTTGGTGGCAGCAGCCCAAGTGCACGCCCAGTGCAGCTGGTGAGTGAAGAAGCCTGGGGCTCAGTGAAGGTCTCGTCAAGGCTTCTGGATACACCTTCACTCATTACGATATCAACTGGGTGCGACAGGCCGTGGACGAGACTTGGAGTGGTGGCTGGTTGAACCTTAACAGTGGCAGAACCCCTATGCACAGAACTCCAGGGCAGAGTTACCTTGACCCGGAAACCTCCATAAGCTGAGTTCAACACCTGACGTCTGACGACACGGCCGTCTACTACTGCGCGAGCCACTTGGTCTACTCCGCTGGTTCGGGGACTTTTTCTAATCACTTCTAATCTGGGTGAGGGACCTGGTACCCTCTCTCAGCTCCACCAAGGCCCATCGTCTTCCCCTGGCACTCTCTCAAGAGCACCTCTGGGGCACAGCGCCCTGGGCTGCTGCTCAAGGACTACTTCCCCAACCGGTACGGTGTGCTGGAACCTCAGCGCCCTGACCAGCGCGTGCACACTTCCCGCTGTCTACAGTCTCAGGA                                         |
| 212_I_GHV1-2_I_GHJ4  | GGGACTCAACAACCACATCTGTCTCTAGAGAAAACCTGTGAGCACAGCTCCTCACCATTGACTGGACCTGGAGGATTCTTCTTGGTGGCAGCAGTACAAGTGCACGCCCAGTCCAGCTGGTGAGTCTGGGGCTGAGGTGAAGAAGCCTGGGGCTCAGTGAAGGTCTCTGCAAGGCTTCTGGATACACCTTCACTCATTACGATATCAACTGGGTGCGACAGGCCGTGGACGAGACTTGGAGTGGTGGCTGGTTGAACCTTAACAGTGGCAGAACCCCTATGCACAGAACTCCAGGGCAGAGTTACCTTGACCCGGAAACCTCCATAAGCTGCTGCTACATGGAGTTCAACACCTGAAGTCTGACGACACGGCCGTCTACTACTGCGCGAGCCACTTGGTCTACTCCGCTGGTTCGGGGACTTTTTCTAATCACTTCTAATCTGGGTGAGGGACCTGGTACCCTCTCTCAGCTCCACCAAGGCCCATCGTCTTCCCCTGGCACCTCTCTCAAGAGCACCTCTGGGGCACAGCGCCCTGGGCTGCTGCTCAAGGACTACTTCCCCAACCGGTACGGTGTGCTGGAACCTCAGCGCCCTGACCAGCGCGTGCACACTTCCCGCTGTCTACAGTCTCAGGA       |
| 212_I_GHV1-8_I_GHJ1  | GAGCATCACTCAACAACCACATCTGTCTCTAGAGAAAACCTGTGAGCACAGCTCCTCACCATTGACTGGACCTGGAGGATTCTTCTTGGTGGCAGCAGTACAAGTGCACGCCCAGTCCAGCTGGTGAGTCTGGGGCTGAGGTGAAGAAGCCTGGGGCTCACTGAAGGTCTCTGCAAGGCTTCTGGATACACCTTCACTCATTACGATATCAACTGGGTGCGACAGGCCGTGGACGAGGCTTGGAGTGGTGGCTGGTTGAACCTTAACAGTGGCAGAACCCCTATGCACAGAACTCCAGGGCAGAGTTACCTTGACCCGGAAACCTCCATAAGCTGCTGCTACATGGAGTTCAACACCTGAAGTCTGAGGACACGGCCGTCTACTACTGCGCGAGGCCACTTGGTCCATTCCGCTGGTTCGGGGACTTTTTCTAACCCTTCTACTACTGGGTGAGGGACCTGGTACCCTCTCTCAGCTCCACCAAGGCCCATCGTCTTCCCCTGGCACCTCTCTCAAGAGCACCTCTGGGGCACAGCGCCCTGGGCTGCTGCTCAAGGACTACTTCCCCAACCGGTACGGTGTGCTGGAACCTCAGCGCCCTGACCAGCGCGTGCACACTTCCCGCTGTCTACAGTCTCAGGA  |
| 212_I_GHV1-8_I_GHJ1  | CGGCGGATTTCTATATGGGACTCAACAACCACATCTGTCTCTAGAGAAAACCTGTGAGCACAGCTCCTCACCATTGACTGGACCTGGAGGATTCTTCTTGGTGGCAGCAGTACAAGTGCACGCCCAGTCCAGCTGGTGAGTCTGGGGCTGAGGTGAAGAAGCCTGGGGCTCAGTGAAGGTCTCTGCAAGACTTCTGGATACACCTTCACTCATTACGATATCAACTGGGTGCGACAGGCCGTGGACGAGGCTTGGAGTGGTGGCTGGTTGAACCTTAACAGTGGCAGAACCCCTATGCACAGAACTTCCAGGGCAGAGTTTCTTGACCCGGAAACCTCCATAAGCTGAGTTCAACACCTGACGTCTGACGACACGGCCGTCTACTACTGCGCGAGGCCACTTGGTCCATTCCGCTGGTTCGGGGACTTTTTCTAACCCTTCTACTACTGGGTGAGGGACCTGGTACCCTCTCTCAGCTCCACCAAGGCCCATCGTCTTCCCCTGGCACCTCTCTCAAGAGCACCTCTGGGGCACAGCGCCCTGGGCTGCTGCTCAAGGACTACTTCCCCAACCGGTACGGTGTGCTGGAACCTCAGCGCCCTGACCAGCGCGTGCACACTTCCCGCTGTCTACAGTCTCAGGA |
| 214_I_GHV4-4_I_GHJ1  | GGGTCAGCTCACATGGAAACTTTCTGAGACTCATGGCCCTCTGACAAGAATCAAAACCTGTGGTTCTTCTCTCTGGTGGCAGCTCCAGATGGTCTCTCAGTGCAACTGCAGAGTGGGTCCCGACTGGTGAAGCCCTGGGGACCTGTCTCACCTGCGCTGTCTGGTGGCCCCATCAACAATAGTAATTTGGTGGGGTGGTCCGCCAGTCCCAGGGAAAGGACTGGAATGGCTTGGAGAAATCAATCACAGGGGAAGTACCAATACAAGTCTCCCTCAGAAACCGAGTACCATTCTTTGGACAAGTCCAGGAACCAATCTCCCTGACTGTGACTCTGTGACCGCCGCGACACCGCATATATTACTGTGTGAGAGAGACTACTGACTACTGTATTCTTTGACCCCTGGAGCCCGGGTCCCTGATCACCCTCTCTCAGCTCCACCAAGGCCCATCGTCTTCCCCTGGCACCTCTCCAAGAGCACCTCTGGGGCACAGCGCCCTGGGCTGCTGCTCAAGGACTACTTCCCCAACCGGTACGGTGTGCTGGAACCTCAGCGCCCTGACCAGCGCGTGCACACTTCCCGCTGTCTACAGTCTCAGGA                                            |
| 214_I_GHV4-4_I_GHJ1  | ATACTTCTGAGACTCATGGCCCTCTGACAAGAATCAAAACCTGTGGTTCTTCTCTCTGGTGGCAGCTCCAGATGGTCTCTCAGTGCAACTGCAGAGTGGGTCCCGACTGGTGAAGCCCTCGGGACCTGTCTCTCACCTGCGCTGTGTGTTGGCCCCATCAACAATAGTAATTTGGTGGGGTCCGCCAGTCCCAGGGAAAGGACTGGAATGGCTTGGAGAAATCAATCACAGGGGAAGTACCAATACAAGTCTCCCTCAGAAACCGAGTACCATTCTTTGGACAAGTCCAGGAACCAATCTCCCTGACTGTGACTCTGTGACCGCCGCGACACCGCATATATTACTGTGTGAGAGAGACTACTGACTACTGTATTCTTTGACCCCTGGAGCCCGGGTCCCTGATCACCCTCTCTCAGCTCCACCAAGGCCCATCGTCTTCCCCTGGCACCTCTCCAAGAGCACCTCTGGGGCACAGCGCCCTGGGCTGCTGCTCAAGGACTACTTCCCCAACCGGTACGGTGTGCTGGAACCTCAGCGCCCTGACCAGCGCGTGCACACTTCCCGCTGTCTACAGTCTCAGGA                                                              |
| 218_I_GHV4-39_I_GHJ4 | ATTTCTTCAATCAGTCCAACCTATAAGGGAAATGCTTTCTGAGAGTCAATGATCATGTGCAAGAAAATGAAGCACCTGGTCTTCTCTCTGGTGGCAGCTCCAGATGGTCTCTCAGTGCAACTGCAGAGTGGGTCCCGACTGGTGAAGCCCTCGGGACCTGTCTCTCACCTGCGCTGTGTGTTGGCCCCATCAACAATAGTAATTTGGTGGGGTCCGCCAGTCCCAGGGAAAGGACTGGAATGGCTTGGAGAAATCAATCACAGGGGAAGTACCAATACAAGTCTCCCTCAGAAACCGAGTACCATTCTTTGGACAAGTCCAGGAACCAATCTCCCTGACTGTGACTCTGTGACCGCCGCGACACCGCATATATTACTGTGTGAGAGAGACTACTGACTACTGTATTCTTTGACCCCTGGAGCCCGGGTCCCTGATCACCCTCTCTCAGCTCCACCAAGGCCCATCGTCTTCCCCTGGCACCTCTCCAAGAGCACCTCTGGGGCACAGCGCCCTGGGCTGCTGCTCAAGGACTACTTCCCCAACCGGTACGGTGTGCTGGAACCTCAGCGCCCTGACCAGCGCGTGCACACTTCCCGCTGTCTACAGTCTCAGGA                              |
| 218_I_GHV4-39_I_GHJ4 | ATTTCTTCAATCAGTCCAACCTATAAGGGAAATGCTTTCTGAGAGTCAATGATCATGTGCAAGAAAATGAAGCACCTGGTCTTCTCTCTGGTGGCAGCTCCAGATGGTCTCTCAGTGCAACTGCAGAGTGGGTCCCGACTGGTGAAGCCCTCGGGACCTGTCTCTCACCTGCGCTGTGTGTTGGCCCCATCAACAATAGTAATTTGGTGGGGTCCGCCAGTCCCAGGGAAAGGACTGGAATGGCTTGGAGAAATCAATCACAGGGGAAGTACCAATACAAGTCTCCCTCAGAAACCGAGTACCATTCTTTGGACAAGTCCAGGAACCAATCTCCCTGACTGTGACTCTGTGACCGCCGCGACACCGCATATATTACTGTGTGAGAGAGACTACTGACTACTGTATTCTTTGACCCCTGGAGCCCGGGTCCCTGATCACCCTCTCTCAGCTCCACCAAGGCCCATCGTCTTCCCCTGGCACCTCTCCAAGAGCACCTCTGGGGCACAGCGCCCTGGGCTGCTGCTCAAGGACTACTTCCCCAACCGGTACGGTGTGCTGGAACCTCAGCGCCCTGACCAGCGCGTGCACACTTCCCGCTGTCTACAGTCTCAGGA                              |
| 218_I_GHV4-39_I_GHJ4 | ACGCGCTATGTTTCTATAGGGATGCTTCTGAGAGTCAATGATCATGTGCAAGAAAATGAAGCACCTGGTCTTCTCTCTGGTGGCAGCTCCAGATGGTCTCTCAGTGCAACTGCAGAGTGGGTCCCGACTGGTGAAGCCCTCGGGACCTGTCTCTCACCTGCGCTGTGTGTTGGCCCCATCAACAATAGTAATTTGGTGGGGTCCGCCAGTCCCAGGGAAAGGACTGGAATGGCTTGGAGAAATCAATCACAGGGGAAGTACCAATACAAGTCTCCCTCAGAAACCGAGTACCATTCTTTGGACAAGTCCAGGAACCAATCTCCCTGACTGTGACTCTGTGACCGCCGCGACACCGCATATATTACTGTGTGAGAGAGACTACTGACTACTGTATTCTTTGACCCCTGGAGCCCGGGTCCCTGATCACCCTCTCTCAGCTCCACCAAGGCCCATCGTCTTCCCCTGGCACCTCTCCAAGAGCACCTCTGGGGCACAGCGCCCTGGGCTGCTGCTCAAGGACTACTTCCCCAACCGGTACGGTGTGCTGGAACCTCAGCGCCCTGACCAGCGCGTGCACACTTCCCGCTGTCTACAGTCTCAGGA                                         |
| 221_I_GHV3-33_I_GHJ4 | GAGCTCTGGGAGAGGAGCCAGCACTAGAAGTGGCGGTGTTCCAATCGGTATCAGCACTGAACACAGAGGACTCACCATTGAGTTTGGCTGAGTGGTTTTCTCTGTTGCTTTTTAAGAGTGTCCAGTGTCCAGTGTGAGTGTGGGGAGGTGGTCCAACTGGGAGTCCCTGAGACTCTCTGTACAGCGTCTGATTCGACTCAAACCTATGGCATGCACTGGTCCGCGAGCTCCAGGCAAGGGCTGGAGTGGTGGCAGTATTGGCATGATGGAGAGATAAATACTATGCAGACTCCGTGAAGGGCCGATTACCATTCTCCAGAGACAATCCAAGAACACTGTATCTCCAATGAACAGTCTGCGAGCCAGGACACCGCTGTATTACTGTGCGAGACAGCGGGCATATCTGTTGCGGGAGATGGGGGGCTTGACTACTGGGGCAGGGACCCCTGGTACCCTCTCTCAGCATCCCCACAGCCCCAAGGTTCCCAGTGTGAGTCCAGTCCAGTGGAAAGTGGTATCGCTGCTGGTCCAGGGCTTCTTCCCAGGAGCACTAGTGTGACTGGAGCGAAAGCGACAGGGCTGACCCGCAAGAACTCCCAGGA                                          |



|                       |                                                                                                                                                                                                                                                                                                                                                                                                                                                                                                                                                                                                                                                                  |
|-----------------------|------------------------------------------------------------------------------------------------------------------------------------------------------------------------------------------------------------------------------------------------------------------------------------------------------------------------------------------------------------------------------------------------------------------------------------------------------------------------------------------------------------------------------------------------------------------------------------------------------------------------------------------------------------------|
| 64_I_GHV4-61_I_GHJ3   | CCGCAATTACTTCTTATATGGGGAGGGTCTGCTCACATGGAAGACTTCTGAGAGTCTGACCTCTGTGCAAGAACATGAACACCTGTGGTTCTTCTCTGCTGGTGGCAGCTCCCAGATGGTCTGCCAGGTGCAGCTGCAGGAGTCGGGCCAAGACTGTGAAGCCTTCACAGACCCCTGTCTCTCACCTGCACCTGTCTGTGGTGGTCCATCAGCACTGGAAATCACTACTGAGCTGGATCCGACAGCACCCCGGGAAGGGCCTGAGTGTGATCGGGTTCACTATTACAGTGGAAACCACTACTAACCCTGCTCACAGTTCGAGTTA GTATGTAGTGGACCCCTCTAAGAACCACTTCTCCCTGAAGTTAGAGCTGTGACTGCCGCGACACGCGCCGTATATTACTGTGCGAAAGGGCAGTGGCTGATACGGGGTCTTTTGATATCTGGGGCCAAGGGACAGTGTACCCTCTCTCAGCTCCACCAAGGGCC ATCGTCTTCCCCCTGACCCTCTCCAAGAGCACCTGTGGGGCACAGCGCCCTGGCTGCTGGTCAAGGACTACTCCCCAACCGGTGACGGTGTGTTGAACTCAGCGCCCTGACCAGCGGTGCACACCTTCCGGCTGTCTACAGTCTCAGGA |
| 66_I_GHV4-59_I_GHJ5   | TCCTTAAATTCAGGTTCCAGCTCACATGGAAACTTCTGAGAGTCTGGACCTCTGTGCAAGAACATGAACATCTGTGGTTCTTCTCTCTGCTGGCAGCTCCCAGATGGTCTGCCAGGTGCATCTGCAGGAGTCGGGCCCGGACTGTGAAGCCTTCGGAG ACCTGTCCCTCAACTGTACTGTCTGTTGGTCCGTTCAGTGGTTACTACTGAGACTGTGATCCGGCAGCCCCCAGGGAAGGGACTGGAGTGGATTGGGAACATCTATTACAGTGGAGCACCACTACAACCCCTCCCTCCAGAGTCAGTCCACATACAGTAGACAGTCC AAGAACCAGCTCTCCCTGAACCTGAACCTGTGACCCGCTGCGACACGCGCGTATTACTGTGCGAGAGTGAACCGGGCAGTGGCTGTGACGTGCGGAGTGTGGGGTGGTTCGACCCCTGGGCCAGGGAATCTGGTGTCTCTCAGCATCCCCGACCAG CCCAAGTCTTCCCGCTGAGCCTCTGCAGCACCCAGCCAGATGGAACGTGTCTATCGCTGCTGCTGACAGGCTTCTCCCCAGAGCCACTCAGTGTGACTGTGAGCGAAAGCGACAGGCGGTGACCGCCAGAACTCCC                     |
| 66_I_GHV4-59_I_GHJ5   | ATACTTCTGAGAGTCTGGACCTCTGTGCAAGAACATGAACATCTGTGGTTCTTCTCTCTGCTGGCAGCTCCCAGATGGCCCTGTCCAAGTGCAGCTGCAAGAGTCGGGCCCGGACTGTGAAGCCTTCGGAGACCCCTGTCCCTCACCTGCACTGTGTGGTGG CTCCCTCACTTTTACTACTGGAGCTGATCCGGCAGCCCCCGGGAAGGGACCGGAGTGGATTGGGAATGTATTTCAATGGCAGCACCACTACAACCCCTCCACCAAGTGCAGTGCATATCAGTGGACAGTCCAAGAACCAGTTCTCCCTGAACCTGAGTCTGCG ACCGACGCGACACGCGGTATTACTGTGCGAGAGTGAACCGGGCAGTGGCTGTGACGTGCGGAGTGTGGGGTGGTTCGACCCCTGGGCCAGGGAATCTGGTGTCTCTCAGCATCCCCGACCAG AGCACCTGTGGGGCACAGCGCCCTGGCTGCTGCTCAAGGACTACTTCCCCAACCGGTGACGGTGTGTTGAACTCAGCGCCCTGACCAGCGGTGCACACCTTCCGGCTGTCTACAGTCTCAGGA                                                                    |
| 67_I_GHV1-3_I_GHJ3    | AGCACATAACAACCACATTCTCTCTTAAAGAGCCCTGGGACACAGCTCATCACCATGACTGGACCTGGAGTTCCTCTTGGTGGCAGCAGTACAGGTGTCCAGTCCCAGGTGCAGCTGGTGCAGTCTGGGGCGGAGGTGAAGAAGCCTGGTCTCGTGAAG GTCTCTGCAAGGCTCTGGTCTCCTCAGCAGTTCGGCTTCACTGCTGGTGGCGACTGGCCCTGGACAGGACTGAGTGCATGGGAGGAATCATCCCTATGTATGGCACAGCAGACTACGCACAGAGTTCCAGGACAGACTCACTATTGTGCGACGAACTCACAGC CACAGTCCCATGGAAGTGCAGGCTGACATCTGAAGACACGCGCATGTATTTCTGCGCGAGACGAAAGCTGTATAGTGGTGGCCCGCCCGCGAGCTTTTGATATCTGGGCCAAGGACAATGATCATGTCTCTCAGCTCCACCAAGGGCCCATGGTCTTCCC CTGTGGCACCTCTCCAAGAGCACCTGTGGGGCACAGCGCCCTGGCTGCTGCTCAAGGACTACTTCCCCAACCGGTGACGGTGTGTTGAACTCAGCGCCCTGACCAGCGGTGCACACCTTCCGGCTGTCTACAGTCTCAGGA               |
| 67_I_GHV1-3_I_GHJ3    | GGCAGCACATAACAACCACATTCTCTCTTAAAGAGCCCTGGGACACAGCTCATCACCATGACTGGACCTGGAGTTCCTCTTGGTGGCAGCAGTACAGGTGTCCAGTCCCAGGTGCAGCTGGTGCAGTCTGGGGCTGAGGTGAAGAAGCCTGGTCTCGTGAAG AAGTCTCCTGCAAGGCTCTGGTACTCCTCAGCAGTTTTGGCTTCACTGCTGGTGGCGACAGGCCCTGGACAAGGACTTGAAGTGCATGGGAGGAATCATCCCTATGTACGGAAGCGCAGACTACGCACAGAGTTCCAGGGCAGACTCAGATTGTGCGACGAACTCA CAGCCACAGTCCCATGGAAGTGCAGGCTGACATCTGAAGACACGCGCGTTATTTCTGCGCGAGACGAAAGCTGTATAGTGGTGGCCCGCCCGCGAGCTTTTGATATCTGGGCCAAGGACAATGATCATGTCTCTCAGCTCCACCAAGGGCCCATGGTCTTCCC TTCCCCCTGACCCTCTCCAAGAGCACCTGTGGGGCACAGCGCCCTGGCTGCTGCTCAAGGACTACTTCCCCAACCGGTGACGGTGTGTTGAACTCAGCGCCCTGACCAGCGGTGCACACCTTCCGGCTGTCTACAGTCTCAGGA   |
| 69_I_GHV5-10-1_I_GHJ6 | AGTCTCCTTACCACCCAGCTGGGATCTCAGGGCTTCTTTCTGTCTCTCCAGGATGGGGTCAACCCCATCTCGCCCTCCTGCTGTTCTCCAAGGAGTCTGTGCGGAAGTGCAGCTGGTGCAGTCCGGAGCAGAGGTGAAGAAGCCCGGGAGTCTGTAGGAT CTCTGTAAAGGTTCTGGATACAGCTTACCAGCTACTGGATCAGCTGGGTGCGCCAGATGCCCGGGAAGGCTGGAGTGGATGGGGAAGATTGATCTACTACTCTTATACCACCTACAGCCCGTCTTCCAAGGCCAGTCCACATCTCAGTGCACAAGTCCATCAGCACT GCCTACCTGCAGTGGAGCAGCCTGAAGGCTCGACACCCGATATATTACTGTGCGAGCCGGTGGCCGCGACGACCCTACTACGGTTTTGACGTGTGGGCCAAGGACCAGGTACCCTGTCTCAGCCTCCACCAAGGGCCCATCGTCTTCCCCCTGGCACCCCTC CTTCCAAGAGCACCTGTGGGGCACAGCGCCCTGGCTGCTGCTCAAGGACTACTTCCCCAACCGGTGACGGTGTGTTGAACTCAGCGCCCTGACCAGCGGTGCACACCTTCCGGCTGTCTACAGTCTCAGGA                  |
| 69_I_GHV5-10-1_I_GHJ6 | AGTCTCCTTACCACCCAGCTGGGATCTCAGGGCTTCTTTCTGTCTCTCCAGGATGGGGTCAACCCCATCTCGCCCTCCTGCTGTTCTCCAAGGAGTCTGTGCGGAAGTGCAGTGGTGCAGTCCGGAGCAGAGGTGAAGAAGCCCGGGAGTCTGTAGGAT CTCTGTGAGGTTCTGGATACACTTTAACAGCTACTGGATCAGCTGGGTGCGCCAGATGCCCGGGAAGGCTGGAGTGGATGGGGAAGATTGATCTACTACTCTTATACCACCTACAGCCCGTCTTCCAAGGCCAGTCCAGTCTCAGTGCACAAGTCCATCAGCACT GCCTACCTGCAGTGGAGCAGCCTAAGGACTCGACACCCGCTATATTACTGTGCGAGCCGGTGGCCGCGACGACCCTACTCGTTTTGACGTGTGGGCCAAGGACCAGGTACCCTGTCTCAGCCTCCACCAAGGGCCCATCGTCTTCCCCCTGGCACCCCTC CAGCACCCAGCAGATGGGAACGTGTCTATCGCTGCTGGTCCAGGACTACTTCCCCAACCGGTGACGGTGTGTTGAACTCAGCGCCCTGACCAGCGGTGCACACCTTCCGGCTGTCTACAGTCTCAGGA                          |
| 92_I_GHV1-2_I_GHJ4    | GAGCATACCCAGCAACCACATCTGTCTCTAGAGAAATCCCCTGAGAGTCCGTTCTCACCATGACTGGACCTGGAGATCCTCTTCTGGTGGCAGCAGCCACAGGAGCCCACTCCCAGGTGCAGCTGGTGCAGTCTGGGGCTGAAGTGAAGAAGCCTGGGGCTCAGTG AGGGTCTCCTGCAAGACTTCTGATACACTTACCAGCTACTGATCAGCTGGGTGCGCCAGATGCCCGGGAAGGCTGGAGTGGATGGGGAAGATTGATCTACTACTCTTATACCACCTACAGCCCGTCTTCCAAGGCCAGTCCAGTCTCAGTGCACAAGTCCATCAGCACT GCCTACCTGCAGTGGAGCAGCCTAAGGACTCGACACCCGCTATATTACTGTGCGAGCCGGTGGCCGCGACGACCCTACTCGTTTTGACGTGTGGGCCAAGGACCAGGTACCCTGTCTCAGCCTCCACCAAGGGCCCATCGTCTTCCCCCTGGCACCCCTCTCCA AAGCACCTCTGGGGCACAGCGCCCTGGCTGCTGGTCAAGGACTACTTCCCCAACCGGTGACGGTGTGTTGAACTCAGCGCCCTGACCAGCGGTGCACACCTTCCGGCTGTCTACAGTCTCAGGA               |
| 92_I_GHV1-2_I_GHJ4    | GAGCATACCCAGCAACCACATCTGTCTCTAGAGAAATCCCCTGAGAGTCCGTTCTCACCATGACTGGACCTGGAGATCCTCTTCTGGTGGCAGCAGCCACAGGAGCCCACTCCCAGGTGCAGCTGGTGCAGTCTGGGGCTGAAGTGAAGAAGCCTGGGGCTCAGTG AAGGTCTCCTGCAAGCTTCTGATACACTTACCAGCTACTGATCAGCTGGGTGCGCCAGATGCCCGGGAAGGCTGGAGTGGATGGGGAAGATTGATCTACTACTCTTATACCACCTACAGCCCGTCTTCCAAGGCCAGTCCAGTCTCAGTGCACAAGTCCATCAGCACT GCCTACCTGCAGTGGAGCAGCCTAAGGACTCGACACCCGCTATATTACTGTGCGAGCCGGTGGCCGCGACGACCCTACTCGTTTTGACGTGTGGGCCAAGGACCAGGTACCCTGTCTCAGCCTCCACCAAGGGCCCATCGTCTTCCCCCTGGCACCCCTCTCCA AAGCACCTCTGGGGCACAGCGCCCTGGCTGCTGGTCAAGGACTACTTCCCCAACCGGTGACGGTGTGTTGAACTCAGCGCCCTGACCAGCGGTGCACACCTTCCGGCTGTCTACAGTCTCAGGA                |
| 92_I_GHV1-2_I_GHJ4    | GAGCATACCCAGCAACCACATCTGTCTCTAGAGAAATCCCCTGAGAGTCCGTTCTCACCATGACTGGACCTGGAGATCCTCTTCTGGTGGCAGCAGCCACAGGAGCCCACTCCCAGGTGCAGCTGGTGCAGTCTGGGGCTGAAGTGAAGAAGCCTGGGGCTCAGTG AAGGTCTCCTGCAAGCTTCTGATACACTTACCAGCTACTGATCAGCTGGGTGCGCCAGATGCCCGGGAAGGCTGGAGTGGATGGGGAAGATTGATCTACTACTCTTATACCACCTACAGCCCGTCTTCCAAGGCCAGTCCAGTCTCAGTGCACAAGTCCATCAGCACT GCCTACCTGCAGTGGAGCAGCCTAAGGACTCGACACCCGCTATATTACTGTGCGAGCCGGTGGCCGCGACGACCCTACTCGTTTTGACGTGTGGGCCAAGGACCAGGTACCCTGTCTCAGCCTCCACCAAGGGCCCATCGTCTTCCCCCTGGCACCCCTCTCCA AAGCACCTCTGGGGCACAGCGCCCTGGCTGCTGGTCAAGGACTACTTCCCCAACCGGTGACGGTGTGTTGAACTCAGCGCCCTGACCAGCGGTGCACACCTTCCGGCTGTCTACAGTCTCAGGA                |





|                      |                                                                                                                                                                                                                                                                                                                                                                                                                                                                                                                                                                                                                                                                               |
|----------------------|-------------------------------------------------------------------------------------------------------------------------------------------------------------------------------------------------------------------------------------------------------------------------------------------------------------------------------------------------------------------------------------------------------------------------------------------------------------------------------------------------------------------------------------------------------------------------------------------------------------------------------------------------------------------------------|
| 24_I_GHV1-24_I_GHJ2  | ACCATCACAAACAGCCACATCCCTCCCCTACAGAAGCCCCAGAGCGCAGCACCTCACCATGGACTGCACTGGAGGATCCTCTTCTTGGTGGCAGCAGCTACAGGCACGCACGCCCAGTCCAGTTGTACAGTCTGGGGCTGAGGTGAAGAAGCCTGGGGCCTCAGTGAAGGTCTCCTGCAAAAGTTTCCGGAGACAGCCTCACTGAATATCCATGCACTGGGTGCGACAGACTCCTGAAAAGGGCTTGAAGTGGTGGAGCAATGATCCTGAGGAAGATGAAATAGTCTACGCACAGAAGTTCCAGGGCAGAGTACCATGACCGAGACACATCAACAGACACAGTCTACCTGGAGCTGAGCAGCCTGAGATCTGAGACACGGCCGTATTACTGTGCAACAGATTACTATGATAAATAGTGGTACTATCCAACTGGTACTTCGATCTCTGGGGCCGTGGCACCTGGTCAATTGTCTCTCAGCCTCCACCAAGGGCCCATCGTCTCCCCCTGGCACCTCCTCCAAGAGCACCTCTGGGGGCACAGCGCCCTGGCTGCTGTCAAGGACTACTCCCCAACCGGTGACGGTGTCTGTGAAGTCAAGGCGCCCTGACCAAGCGCGTGCACACCTCCCGGCTGTCTACAGTCTCAGGA     |
| 24_I_GHV1-24_I_GHJ2  | ACCATCACAAACAGCCACATCCCTCCCCTACAGAAGCCCCAGAGCGCAGCACCTCACCATGGACTGCACTGGAGGATCCTCTTCTTGGTGGCAGCAGCTACAGGCACCCACGCCCAGTCCAGTTGGTACAGTCTGGGGCTGAGGTGAAGAAGCCTGGGGCCTCAGTGAAGGTCTCCTGCAAAAGTTTCCGGAGAAAGGCTCACTGAATATCCATGCACTGGGTGCGACAGACTCCTGAAAAGGACTTGAAGTGGATGGAGGTTCTGATCCTGAGGAAGATGAAATAGTCTACGCACAGAAGTTCCAGGGCAGAGTACCATGACCGAGACACATCAACAGACACAGTCTACCTGGAGCTGAGCAGCCTGAGATCTGACGACACGGCCGTATTACTGTGCAACAGATTACTTGTAAACAGTGGTATTACCCAACTGGTACTTCGATCTCTGGGGCCGTGGCACCTGGTCAATTGTCTCTCAGCCTCCACCAAGGGCCCATCGTCTCCCCCTGGCACCTCCTCCAAGAGCACCTCTGGGGGCACAGCGCCCTGGCTGCTGTCAAGGACTACTCCCCAACCGGTGACGGTGTCTGTGAAGTCAAGGCGCCCTGACCAAGCGCGTGCACACCTCCCGGCTGTCTCT             |
| 24_I_GHV1-24_I_GHJ2  | ACCATCACAAACAGCCACATCCCTCCCCTACAGAAGCCCCAGAGCGCAGCACCTCACCATGGACTGCACTGGAGGATCCTCTTCTTGGTGGCAGCAGCTACAGGCACCCACGCCCAGTCCAGTTGGTACAGTCTGGGGCTGAGGTGAAGAAGCCTGGGGCCTCAGTGAAGGTCTCCTGCAAAAGTTTCCGGAGAAAGGCTCACTGAATATCCATGCACTGGGTGCGACAGACTCCTGAAAAGGACTTGAAGTGGATGGAGGTTCTGATCCTGAGGAAGATGAAATAGTCTACGCACAGAAGTTCCAGGGCAGAGTACCATGACCGAGACACATCAACAGACACAGTCTACCTGGAGCTGAGCAGCCTGAGATCTGACGACACGGCCGTATTACTGTGCAACAGATTACTTGTAAACAGTGGTATTACCCAACTGGTACTTCGATCTCTGGGGCCGTGGCACCTGGTCAATTGTCTCTCAGCCTCCACCAAGGGCCCATCGTCTCCCCCTGGCACCTCCTCCAAGAGCACCTCTGGGGGCACAGCGCCCTGGCTGCTGTCAAGGACTACTCCCCAACCGGTGACGGTGTCTGTGAAGTCAAGGCGCCCTGACCAAGCGCGTGCACACCTCCCGGCTGTCTCTACAGTCTCAGGA |
| 24_I_GHV1-24_I_GHJ2  | ACCATCACAAACAGCCACATCCCTCCCCTACAGAAGCCCCAGAGCGCAGCACCTCACCATGGACTGCACTGGAGGATCCTCTTCTTGGTGGCAGCAGCTACAGGCACGCACGCCCAGTCCAGTTGGTACAGTCTGGGGCTGAGGTGAAGAAGCCTGGGGCCTCAGTGAAGGTCTCCTGCAAAAGTTTCCGGAGAAAGGCTCACTGAATATCCATGCACTGGGTGCGACAGACTCCTGAAAAGGACTTGAAGTGGATGGAGGTTCTGATCCTGAGGAAGATGAAATAGTCTACGCACAGAAGTTCCAGGGCAGAGTACCATGACCGAGACACATCAACAGACACAGTCTACCTGGAGCTGAGCAGCCTGAGATCTGACGACACGGCCGTATTACTGTGCAACAGATTACTTGTAAACAGTGGTATTACCCAACTGGTACTTCGATCTCTGGGGCCGTGGCACCTGGTCAATTGTCTCTCAGCCTCCACCAAGGGCCCATCGTCTCCCCCTGGCACCTCCTCCAAGAGCACCTCTGGGGGCACAGCGCCCTGGCTGCTGTCAAGGACTACTCCCCAACCGGTGACGGTGTCTGTGAAGTCAAGGCGCCCTGACCAAGCGCGTGCACACCTCCCGGCTGTCTCTACAGTCTCAGGA |
| 63_I_GHV2-5_I_GHJ5   | AGTGACTCCTGCCCCACATGGACACACTTTGCTCCAGCTCCTGCTGCTGACCTCCCTCATGGTCTTGTCCAGATCACCTTGACGGAGTCTGGTCTACGCTGGTGAACCACACAGACCTCAGCTGACCTGCAATTTCTGGAATCTCACTCATCACTAGTGAAGTGGTGGTGGTGGTTCAGCCCCAGAAAGGCCCTGAGTCCCTGCACTCATTCTTGGATGGAGATAAGCGCTACAGCCCATCTCTGAACCGCAGGCTCACCATCAACAAGACACCTCCAAAAACAGGTGTCCTTACAATGACCAACATGGACCTGTGGACACAGCCACATATTACTGTGACACCTCGCTATGTTCCGGGAATTTGTTCCACCTGGGGCCAGGAATCTGTCACCTCTCCTCAGCCTCCACCAAGGGCCCATCGTCTCCCCCTGGCACCTCCTCCAAGAGCACCTCTGGGGGCACAGCGCCCTGGCTGCTGTCAAGGACTACTCCCCAACCGGTGACGGTGTCTGTGAAGTCAAGGCGCCCTGACCAAGCGCGTGCACACCTCCCGGCTGTCTCTACAGTCTCAGGA                                                                                |
| 63_I_GHV2-5_I_GHJ5   | GGGTTTTCTTATATGGGAGTGAAGTCTGCTGCCCCACATGGACACACTTTGCTCCAGCTCCTGCTGCTGACCTCCCTCATGGTCTTGTCCAGATCACCTTGACGGAGTCTGGTCCAAGCTGGTGAACCACACAGACCTCAGCTGACGTGCAACTTCTCTGATTCTCACTCATCACCAGTGAATGGGTGGTGGTCCGTGAGTGGTCCGTGAGTGGTCCGTGCACTCATTCTTGGATGGAGATAAGCGCTACAGCCATCTCTGAACCGCAGGCTCACCATCAACAAGACACCTCCAAAAACAGGTGTCCTGACAATGACCAACATGGACCTGTGGACACAGCCACATATTACTGTGACACCTCGCTATGTTCCGTGGGAATTTGTTCCACCTGGGGCCAGGAATCTGTCACCGTCTCCTCGGCTCCACCAAGGGCCCATCGTCTCCCCCTGGCACCTCCTCCAAGAGCACCTCTGGGGGCACAGCGCCCTGGCTGCTGTCAAGGACTACTCCCCAACCGGTGACGGTGTCTGTGAAGTCAAGGCGCCCTGACCAAGCGCGTGCACACCTCCCGGCTGTCTCTACAGTCTCAGGA                                                              |
| 63_I_GHV2-5_I_GHJ5   | GCACATCCTTCTTATATGGGAGTGAAGTCTGCTGCCCCACATGGACACACTTTGCTCCAGCTCCTGCTGCTGACCTCCCTCATGGTCTTGTCCAGATCACCTTGACGGAGTCTGGTCCAAGCTGGTGAACCACACAGACCTCAGCTGACCTGCAACTTCTCTGATTCTCACTCATCACTAGTGAATGGGTGGTGGTCCGTGAGTGGTCCGTGAGTGGTCCGTGCACTCATTCTTGGATGGAGATAAGCGCTACAGCCATCTCTGAACCGCAGGCTCACCATCAACAAGACACCTCCAAAAACAGGTGTCCTTACAATGACCAACATGGACCTGTGGACACAGCCACATATTACTGTGACACCTCGCTATGTTCCGTGGGAATTTGTTCCACCTGGGGCCAGGAATCTGTCACCGTCTCCTCAGCCTCCACCAAGGGCCCATCGTCTCCCCCTGGCACCTCCTCCAAGAGCACCTCTGGGGGCACAGCGCCCTGGCTGCTGTCAAGGACTACTCCCCAACCGGTGACGGTGTCTGTGAAGTCAAGGCGCCCTGACCAAGCGCGTGCACACCTCCCGGCTGTCTCTACAGTCTCAGGA                                                          |
| 63_I_GHV2-5_I_GHJ5   | CAAGTTTTCTTATATGGGAGTGAAGTCTGCTGCCCCACATGGACACACTTTGCTCCAGCTCCTGCTGCTGACCTCCCTCATGGTCTTGTCCAGATCACCTTGACGGAGTCTGGTCCAAGCTGGTGAACCACACAGACCTCAGCTGACCTGCAACTTCTCTGATTCTCACTCATCACTAGTGAATGGGTGGTGGTCCGTGAGTGGTCCGTGAGTGGTCCGTGCACTCATTCTTGGATGGAGATAAGCGCTACAGCCATCTCTGAACCGCAGGCTCACCATCAACAAGACACCTCCAAAAACAGGTGTCCTGACAATGACCAACATGGACCTGTGGACACAGCCACATATTACTGTGACACCTCGCTATGTTCCGTGGGAATTTGTTCCACCTGGGGCCAGGAATCTGTCACCGTCTCCTCAGCCTCCACCAAGGGCCCATCGTCTCCCCCTGGCACCTCCTCCAAGAGCACCTCTGGGGGCACAGCGCCCTGGCTGCTGTCAAGGACTACTCCCCAACCGGTGACGGTGTCTGTGAAGTCAAGGCGCCCTGACCAAGCGCGTGCACACCTCCCGGCTGTCTCTACAGTCTCAGGA                                                            |
| 63_I_GHV2-5_I_GHJ5   | AAATGGTTTTCTTATATGGGAGTGAAGTCTGCTGCCCCACATGGACACACTTTGCTCCAGCTCCTGCTGCTGACCTCCCTCATGGTCTTGTCCAGATCACCTTGACGGAGTCTGGTCCAAGCTGGTGAACCACACAGACCTCAGCTGACCTGCAACTTCTCTGATTCTCACTCATCACTAGTGAATGGGTGGTGGTCCGTGAGTGGTCCGTGAGTGGTCCGTGCACTCATTCTTGGATGGAGATAAGCGCTACAGCCATCTCTGAATGGAGGCTCACCATCAACAAGACACCTCCAAAAACAGGTGTCCTGACAATGACCAACATGGACCTGTGGACACAGCCACATATTACTGTGACACCTCGCTATGTTCCGTGGGAATTTGTTCCACCTGGGGCCAGGAATCTGTCACCGTCTCCTCAGCCTCCACCAAGGGCCCATCGTCTCCCCCTGGCACCTCCTCCAAGAGCACCTCTGGGGGCACAGCGCCCTGGCTGCTGTCAAGGACTACTCCCCAACCGGTGACGGTGTCTGTGAAGTCAAGGCGCCCTGACCAAGCGCGTGCACACCTCCCGGCTGTCTCTACAGTCTCAGGA                                                           |
| 141_I_GHV3-21_I_GHJ3 | AGCTCTGAGAGAGGACCTTGGCCCTGATTCCAAGGCTATCCACTTGGTATCAGCAGTACGACCCAGGATTACCATGAACTGGGGCTCCGTGATTTCTAGTTGCTATTTAGAAAGTTTTCCAGTGTAGGTGAGTGGTGGGAGGCTGGTCAAGCCTGGGGTCCCTGAGACTCTCCTGTGCACTCCTGATTCAGTTCAGTAAATGATGATGAAGTGGTCCGCGAGTGGTCCGCGAGTGGTCTCCTCATTAGTGGTCCAGTAGTTTCAATACTACGCAGACTCAATGAAGGGCCGATTACCACTCCAGAGACAACGCTAGAACTCACTATATCTGCAAAATGAACAGCCTGAGAGCCGAGGACACGGCTGTATTACTGTCCAGAGATACCCGCTAGCCCGGATACTTTGATTCTGGGGCCAAGGGACAATGTGACCGTTTTCTCAGCCTCCACCAAGGGCCCATCGTCTCCCCCTGGCACCTCCTCCAAGAGCACCTCTGGGGGCACAGCGCCCTGGCTGCTGTCAAGGACTACTCCCCAACCGGTGACGGTGTCTGTGAAGTCAAGGCGCCCTGACCAAGCGCGTGCACACCTCCCGGCTGTCTCTACAGTCTCAGGA                                       |



|                       |                                                                                                                                                                                                                                                                                                                                                                                                                                                                                                                                                                                                                                                                                |
|-----------------------|--------------------------------------------------------------------------------------------------------------------------------------------------------------------------------------------------------------------------------------------------------------------------------------------------------------------------------------------------------------------------------------------------------------------------------------------------------------------------------------------------------------------------------------------------------------------------------------------------------------------------------------------------------------------------------|
| 108_I_GHV1-8_I_GHJ4   | GGAGAGCATCACTCAACAACCACATCTGTCTCTAGAGAAAACCTGTGAGCAGCGTCTCACCATGACTGGACCTGGAGGATCCTCTTCTTGGTGGCAGCAGCTACAAGTCCCACGCCAGGTGCAGCTGGTGCAGTCTGGGGCTGAGGTGAAGAACCTGGGGCCTCA<br>GTGAGAATCTCTGCAAGCTTCTGAATACACCTTACCACCTATGATATCAACTGGGTGCGACAGGCGCTGGACAAGGCTTGAAGTGGGTGGCTGGATGAACCTAATACTGGCGACACCGCCTATGGCGAAGTCCAGGGCAGAGTACCCTGACCCGGAACACCTCC<br>ATAGCCACAGCCTACATGAGCTGAGCAGCCTGCGATCTGAGACACGCGGTATTATTGTGCGAGAGCCACCTTCTGACTTCTATGTTTGGGGACTTATTCAACCACTTATATACTGGGTGAGGAAACCTGCTCACCGTCTCCTCAGCCTCCACCAAGGGCCCAT<br>GGTCTTCCCCCTGGCACCTCTCCAAGAGCACCTCTGGGGCACAGCGCCCTGGCTGCTGTCAAGGACTACTCCCCAACCGGTGACGGTGTCTGTGAAGTCAAGCGCCCTGACCAGCGCGTGCACACCTTCCCGCTGTCTACAGTCTCAGGA |
| 108_I_GHV1-8_I_GHJ4   | ATCACTCAACAACCACATCTGTCTCTAGAGAAAACCTGTGAGCAGCTCCTCACCATGACTGGACCTGGAGGATCCTCTTCTTGGTGGCAGCAGCTACAAGTCCCACGCCAGGTGCAGCTGGTGCAGTCTGGGACTGAAGTGAAGAACCTGGGGCCTCAGTGAAGGT<br>TTCTGTAAAGCTTCTGATACACCTTACCATTATGATATCAACTGGGTGCGACAGGCTGCTGGACAAGGCTTGAAGTGGATGGGATGAACCTCAAAGTGGCAAACCGCCTATGACAGAAAGTCCAGGGCAGACTTATCATGACCCGGAACACCTCCATGAAGCACA<br>GCCTACATGAGCTGAAGCAGCTGAGATCTGACGACACGCGCTTACTACTGCGAGAGCCAGTTCGTACTTCTATGATTGGGGACTTATTCAACCACTTATATACTGGGTGAGGAAACCTGCTCACCGTCTCCTCAGCCTCCACCAAGGGCCCATCGTCTTCCC<br>CCTGGCACCTCTCCAAGAGCACCTCTGGGGCACAGCGCCCTGGCTGCTGTCAAGGACTACTCCCCAACCGGTGACGGTGTCTGTGAAGTCAAGCGCCCTGACCAGCGCGTGCACACCTTCCCGCTGTCTACAGTCTCAGGA         |
| 150_I_GHV1-69D_I_GHJ3 | ATCACATAACAACCACATCTCTCTAAGAACCCCTGGGAGCAGCTCATCACCATGACTGGACCTGGAGGTTCTCTTTGGTGGCAGCAGCTACAGGTGTCCAGTCCCAGGTGCAGCTGGTGCAGTCTGGGGCTGAGGTGAAGAACCTGGGTCTCGGTGAAG<br>GTCTCTGCAAGGCTTCTGAGGACCTTCAAGCAATATGCTATCACCTGGGTGCGACAGGCCCTGGACAAGGCTTGAAGTGGATGGAGGATCATCCCTATCTTTGATACAGCAGACTACACAGCAGTCCAGGGCAGAGTACCATACCCTGACGAAATCCACGAA<br>CACAGCCTACATGAGGTGAGCAGCTCAGATCTGAGGACACGCGGTATTATTGTGCGAGAGGATGGAGGCTCGGCATGGCAGTCTGATGCTTTGATATCTGGGGCAAGGGACAATGTCTGTCTTCCAGCCTCCACCAAGGGCCCATCGTCTTCCC<br>CCCTGGCACCTCTCCAAGAGCACCTCTGGGGCACAGCGCCCTGGCTGCTGTCAAGGACTACTCCCCAACCGGTGACGGTGTCTGTGAAGTCAAGCGCCCTGACCAGCGCGTGCACACCTTCCCGCTGTCTACAGTCTCAGGA                          |
| 150_I_GHV1-69D_I_GHJ3 | ATCACATCAACAACCACATCTCTCTAAGAACCCCTGGGAGCAGCTCATCACCATGACTGGACCTGGAGGTTCTCTTTGGTGGCAGCGCCACAGGTGTCCAGTCCCAGGTGCAGCTGGTGCAGTCTGGGGCTGAGGTGAAGAACCTGGGTCTCGGTGAAG<br>GTCTCTGCAAGGCTTCTGAGGACCTTCAAGCAATATGCTATCACCTGGGTGCGACAGGCCCTGGACAAGGCTTGAAGTGGATGGAGGATCATCCCTATCTTTGATACAGCAGACTACACAGCAGTCCAGGGCAGAGTACCATACCCTGACGAAATCCACGAA<br>CACAGCCTACATGAGGTGAGCAGCTCAGATCTGAGGACACGCGGTATTATTGTGCGAGAGGATGGAGGCTCGGCATGGCAGTCTGATGCTTTGATATCTGGGGCAAGGGACAATGTCTGTCTTCCAGCCTCCACCAAGGGCCCATCGTCTTCCC<br>CCCTGGCACCTCTCCAAGAGCACCTCTGGGGCACAGCGCCCTGGCTGCTGTCAAGGACTACTCCCCAACCGGTGACGGTGTCTGTGAAGTCAAGCGCCCTGACCAGCGCGTGCACACCTTCCCGCTGTCTACAGTCTCAGGA                          |
| 150_I_GHV1-69D_I_GHJ3 | AACCACATCTCTCTAAGAACCCCTGGGAGCAGCTCATCACCATGACTGGACCTGGAGGTTCTCTTTGGTGGCAGCAGCTACAGGTGTCCAGTCCCAGGTGCAGTGGTGCAGTCTGGGGCTGAGGTGAAGAACCTGGGTCTCGGTGAAG<br>GGGCTTCTGAGGACCTTCAAGCAATATGCTATCACCTGGGTGCGACAGGCCCTGGACAAGGCTTGAAGTGGATGGAGGATCATCCCTATCTTTGATACACCAACTACGACAGAAAGTCCAGGGAAAGTACAGGTTAGTGTGACGAGAGCCAGAACACAGCCTA<br>CATGGAGCTGACTACTGACATCTGAAGACACGCGGTATTACTGTGCGAGGATGGAGGCTCGGCATGGCAGTCTGATGCTTTGATATCTGGGGCAAGGGACAATGTCTCACCGTCTTCCAGCCTCCACCAAGGGCCCATCGTCTTCCCCCTGGCAC<br>CTCTCCAAGAGCACCTCTGGGGCACAGCGCCCTGGCTGCTGTCAAGGACTACTCCCCAACCGGTGACGGTGTCTGTGAAGTCAAGCGCCCTGACCAGCGCGTGCACACCTTCCCGCTGTCTACAGTCTCAGGA                                            |
| 175_I_GHV3-30_I_GHJ4  | GAGCTCTGGAGAGAGCCAGCACTAGAAGTGGCGGTGTTCCATTGCTGATCAGCACTGAACACAGAGGACTCACCATGAGTTTGGGTGAGCTGGTCTCTCTGTTGCTTTAAGAGTGTCCAGTGTGATGAGTGTGAGTCTGGGGAGGCGT<br>GGTCCAGCCTGGAGGTTCTGAGACTCTCTGTGAGCCTCTGGATTGAGTTCAAGATGAGCATGCACTGGTCCGCCAGGCTCCAGGCAAGGGCTGAGTGGTGGCAGCCATGCTAATGATGAGTAAAAAATACTATGAGACTCCGTGAAGGGCGGATT<br>CACCATCTCCAGACAATCCAAGAACCACTGATCTGAAATGAACAGCCTGAGAACTGAGACACGGCTATGATTACTGTGCGAAAGATGGGACATATGTTTGGGGAGTTATCAGAGTTGACTACTGGGCCAGGGAACCCGGTCCAGCTCTCCTCAGCTTCCAC<br>CAAGGGCCATCGTCTCCCCCTGGCCCTGCTCCAGGAGCACCTCCGAGACACG                                                                                                                               |
| 175_I_GHV3-30_I_GHJ4  | GGGAGAGAGCCAGCACTAGAAGTGGCGGTGTTCCATTGCTGATCAGCACTGAACACAGAGGACTCACCATGAGTTTGGGTGAGCTGGTCTCTCTGTTGCTTTAAGAGTGTCCAGTGTGATGAGTGTGAGTCTGGGGAGGCGTGGTCCAG<br>CTGGGGGCTCCTGAGACTCTCTGTGAGCCTCTGATTGAGTCTGAGGCTATGAGCATGCACTGGTCCGCCAGGCTCCAGGCAAGGGACTGAGTGGTGGTGGTCCATATCTAATGATGAAGTAAACAAATACTATGAAGACTCCGTGAAGGGCGGATTACCATCTCC<br>AGAGACAATCCAAGAACAGCTGTTCTGCAATGAACAGCCTGAGACCTGAGACACGCTATGATTACTGTGCGAAAGATGGGACATATGTTTGGGGAGTTATCAGAACTGGACTGTGGGGCCAGGGAACCTGTTACCCTCTCCTCAGCTTCCACCAAGGGCCC<br>ATCCGTCTCCCCCTGGCCCTGCTCCAGGAGCACCTCCGAGAGCACAGCCCTGGCTGCTGTCAAGGACTACTCCCCAACCGGTGACGGTGTCTGTGAAGTCAAGCGCCCTGACCAGCGCGTGCACACCTTCCCGCTGTCTACAGTCTCAGGA                 |
| 188_I_GHV1-69_I_GHJ5  | AGCATCACATAACAACCACATCTCTCTGAAGAACCCCTGGGAGCAGCTCATCACCATGACTGGACCTGGAGGTTCTCTGTGTGGTGGCAGCAGCTACAGGTGTCCAGTCCCAGGTGCATCTGGTGCAGTCTGGGGCTGAGGTGAAGAACCTGGGTCTCGGTG<br>AAGGTCTCCTGCAAGGCTTCTGAGGACCTTCTATGCTATCAGCTGGGTGCGACAGGCCCTGGACAAGGACTTGAAGTGGTGGAGGCTCGTCCGATGTTGATACACCAAGCTATGACAGAAAGTCAAGGGCAGAGTACCATACCCTGACAAATCCACGAGCAC<br>AGCCTACATGAGCTGTACAGCCTGACATCTGAGGACACGCGCTTATTACTGTGCGAGAGGCTTATAGCAGTCTTCTGTGTTGACCCCTGGGGCCAGGGAACCTGTCTCATCTCTCAACCTCCACCAAGGGCCCATCGTCTTCCCCCTGGCACCTCTCCAAGA<br>GCACCTCTGGGGCACAGCGCCCTGGCTGCTGTCAAGGACTACTCCCCAACCGGTGACGGTGTCTGTGAAGTCAAGCGCCCTGACCAGCGCGTGCACACCTTCCCGCTGTCTACAGTCTCAGGA                                  |
| 188_I_GHV1-69_I_GHJ5  | ATCACATAACAACCACATCTCTCTGAAGAACCCCTGGGAGCAGCTCATCACCATGACTGGACCTGGAGGTTCTCTTTGGTGGCAGCAGCTACAGGTGTCCAGTCCCAGGTGCAGCTGGTGCAGTCTGGGGCTGAGGTGAAGAACCTGGGTCTCGGTGAAG<br>GTCTCTGCAAGGCTTCTGAGGACCTTCAAGCAATATGCTATCACCTGGGTGCGACAGGCCCTGGACAAGGACTTGAAGTGGTGGAGGCTCGTCCGATGTTGATACACCAAGCTATGACAGAAAGTCAAGGGCAGAGTACCATACCCTGACAAATCCACGAGCAC<br>ATGCTACTACTTGGAGCTGAGCAGCCTGACATCTGACGACACAGCCCTTATTACTGTGCGAGCGACCTATAGCAGTCTTCTGTGTTGACCCCTGGGGCCAGGGAACCTGTCTCATCTCTCAACCTCCACCAAGGGCCCATCGTCTTCCCCCTGGCACCTCTCC<br>AAGAGCACCTCTGGGGCACAGCGCCCTGGCTGCTGTCAAGGACTACTCCCCAACCGGTGACGGTGTCTGTGAAGTCAAGCGCCCTGACCAGCGCGTGCACACCTTCCCGCTGTCTACAGTCTCAGGA                             |
| 188_I_GHV1-69_I_GHJ5  | GGGATCACATAACAACCACATCTCTCTGAAGAACCCCTGGGAGCAGCTCATCACCATGACTGGACCTGGAGGTTCTCTTTGGTGGCGCAGCTACAGGTGTCCAGTCCCAGGTGCAGCTGGTGCAGTCTGGGGCTGAGGTGAAGAACCTGGGTCTCGGTGAG<br>GAAGTCTCCTGCAAGGCTTCTGAGGACCTTCAACAGCTATGCTATCAGCTGGGTGCGACAGGCCCTGGACAAGGCTTGAAGTGGTGGAGGATCGTCCCTATCTTTGAGACACCAAGTACGACAGAAAGTCCAGGGCAGAGTACCATACCCTGACAAATCCACGAGCAC<br>GAGCACAGCCTACATGAGCTGACAGCCTGAGATCTGAGGACACGCGCTTATTACTGTGCGAGCGACCTATAGCAGTCTTCTGTGTTGACCCCTGGGGCCAGGGAACCTGTCTCATCTCTCAACCTCCACCAAGGGCCCATCGTCTTCCCCCTGGCACCTCTCC<br>TCCAAGAGCACCTCTGGGGCACAGCGCCCTGGCTGCTGTCAAGGACTACTCCCCAACCGGTGACGGTGTCTGTGAAGTCAAGCGCCCTGACCAGCGCGTGCACACCTTCCCGCTGTCTACAGTCTCAGGA                     |

|                       |                                                                                                                                                                                                                                                                                                                                                                                                                                                                                                                                                                                                                                                                                                             |
|-----------------------|-------------------------------------------------------------------------------------------------------------------------------------------------------------------------------------------------------------------------------------------------------------------------------------------------------------------------------------------------------------------------------------------------------------------------------------------------------------------------------------------------------------------------------------------------------------------------------------------------------------------------------------------------------------------------------------------------------------|
| 228_I_GHV3-21_I_GHJ1  | AGCTCTGAGAGAGGAGCCTTAGCCCTGGATTCCAAGGCCATCCACTTGGTGATCAGCACTGAGCACCGAGGATTACCATTGGAAGTGGGGCTCCGCTGGGCTTCTCTTGTGCTATTTAGAAGGTGTCCAGTGTGAGGTGCAGCTGGTGGAGTCGGGGGAGGCGCTGTCAGCCGGGGGCTCCCTGAGAGTTTCTGTGAGAGTTCCTGTGAGCCTCTGATTCACTTCACTTCTCTACAGCATGAGCTGGTCCGCGAGGCTCCAGGGAAGGGCTGAAGTGGGTCTCATCTATTAGCAGTAGTGGAAATTACATATACTACGCAGACTCAGTGAAGGGCCGATTACCGTGTCCAGAGACAACCTCAAGAACTCAATATATCTGAGATGAACAGCCTGAGAGCCGAGGACACGGTGTGATTACTGTGCGAGAGATAGTGTGCGCAGCACCTGGTATTGGATGGCTAACACTTCCAACACTGGGGCCCCGGCACCTGTCCAGCTCTCCTCAGCCTCACCAAGGGCCCATCGTCTTCCCCTGGCACCTCTCCAAGAGCACCTCTGGGGCACAGCGCCCTGGGCTGCTGTCAGGACTACTCCCCAACCGGTGACGGTGTCTGTGAAGTCCAGGCGCCCTGACCAGCGCGTGCACACCTTCCCGCTGTCTACAGTCTCAGGA           |
| 228_I_GHV3-21_I_GHJ1  | AGCTCTGAGAGAGGAGCCTTAGCCCTGGATTCCAAGGCCATCCACTTGGTGATCAGCACTGAGCACCGAGGATTACCATTGGAAGTGGGGCTCCGCTGGGTTTTCTTGTGGTATTTAGAAGGTGTCCAGTGTGAGGTGCAGTGGTGGAGACTGGGGAGGCGCTGTCAGCCGGGGGCTCCCTGAGACTCTCCTGTGAGCCTCTGATTCACTTCACTAGTAGTACAGCATGAGCTGGTCCGCGAGGCTCCAGGGAAGGGCTGAAGTGGGTCTCTCTATCAGTAGTAGTGGTAGTTACATGACTATGAGACTCCGTGAAGGGCCGATTACCATTTCCAGAGACAACGCCAGAACTCACTGTTTCTGCAAGTGAACAGCCTGAGAGCCGAGACACGGTGTATTACTGTGCGAGAGATAGTGTGCGCAGTACCTGGTACTGGATGGCTAACACTTCCAGCGCTGGGGCCCCGGCACCGTGGTACCCTGTCTCAGCCTCCACCAAGGGCCCATCGTCTTCCCCTGGCACCTCTCCAAGAGCACCTCTGGGGCACAGCGCCCTGGGCTGCTGGTCAAGGACTACTCCCCAACCGGTGACGGTGTCTGTGAAGTCCAGGCGCCCTGACCAGCGCGTGCACACCTTCCCGCTGTCTACAGTCTCAGGA                         |
| 228_I_GHV3-21_I_GHJ1  | ATGGGGGAGAGAGGAGCCTTAGCCCTGGATTCCAAGGCCATCCACTTGGTGATCAGCACTGAGCACCGAGGATTACCATTGGAAGTGGGGCTCCGCTGGGTTTTCTTGTGGTATTTAGAAGGTGTCCAGTGTGAGGTGCAGTGGTGGAGACTGGGGAGGCGCTGTCAGCCGGGGGCTCCCTGAGACTCTCCTGTGAGCCTCTGATTCACTTCACTAGTAGTACAGCATGAGCTGGTCCGCGAGGCTCCAGGGAAGGGCTGAAGTGGGTCTCTCTATCAGTAGTAGTGGTAGTTACATGACTATGAGACTCCGTGAAGGGCCGATTACCATTTCCAGAGACAACGCCAGAACTCACTGTTTCTGCAAGTGAACAGCCTGAGAGCCGAGGACACGGTGTATTACTGTGCGAGAGATAGTGTGCGCAGTACCTGGTACTGGATGGCTAACACTTCCAGCGCTGGGGCCCCGGCACCGTGGTACCCTGTCTCAGCCTCCACCAAGGGCCCATCGTCTTCCCCTGGCACCTCTCCAAGAGCACCTCTGGGGCACAGCGCCCTGGGCTGCTGGTCAAGGACTACTCCCCAACCGGTGACGGTGTCTGTGAAGTCCAGGCGCCCTGACCAGCGCGTGCACACCTTCCCGCTGTCTACAGTCTCAGGA                        |
| 233_I_GHV3-74_I_GHJ6  | CACCTCTGTGAAGAAAACCCAGCCCTGCAGCTCTGGAGAGAGCCCCAGCCCTGGGATTCCCAGCTGTTCTGTCTGATCAGCACTGACACAGAGAAGTACCATTGGGCTGACCTGGTTTTCTTGTGCTATTTAAAGGTGTCCAGTGTGAGGGCAGCTGGTGGAGTCCGGGGGAGCCTTAGTTCACTCTGGGGGCTCCCTGAGACTCTCTGTGAGCCTCTGATTCACTTCACTTCACTACTGATGACTGGATGACTGGTCCGCGAAGCTCCAGGGAAAGGGCTGAAGTGGGTCTCATCTAGTATTAAAGGTGACGGGAGTAGCACAACTACGCGGACTCCGTGAAGGCCGATTACCATTCCAGAGACAACGCCAAGAACACACTGTTTTGCAAAATAACTCTGAGAGCCGACGACACGGCTGTATTACTGTGCAAAAGCGGGCGGATATTGCACTAGTACCACCTGCCATATCCTAGTATGAGCTGTGGGCCAAGAACACGTCACCGTCTCCTCAGCTCCACCAAGGGCCCATCGTCTTCCCCTGGCACCTCTCCAAGAGCACCTCTGGGGCACAGCGCCCTGGGCTGCTGGTCAAGGACTACTCCCCAACCGGTGACGGTGTCTGTGAAGTCCAGGCGCCCTGACCAGCGCGTGCACACCTTCCCGCTGTCTACAGTCTCAGGA |
| 233_I_GHV3-74_I_GHJ6  | GGAGCCCCAGCCCTGGATTCCCAGCTGTTCTGCTTGTGATCAGCACTGACACAGAGAAGTACCATTGGGCTGACCTGGTTTTCTTGTGCTATTTAAAGGTGTCCAGTGTGAGGGCAGCTGGTGGAGTCCGGGGAGGCTTAGTTAGTCCAGCTGGGGTCTCTGTGAGCTCTCCTGTGAGCCTCTGATTCACTTCACTTCACTACTGATGACTGGTCCGCGAAGCTCCAGGGAAGGGCTGGTGGGTCTCAGTATTAAAGGTGATGGAGTGGCACAACTACGCGACTCCGTGAAGGGCCGATTACCATTCTCCAGAGACAAGCCAAAGAACACTGTTTCTGAGATGAACACTCTGAGAGCCGAGACACGGCTGTATTACTGTGCAAAAGCGGGCGGATTTGCACTAGTACCACCTGCCATATCCTAGTATGAGCTGTGGGCCAAGGACTACGGTACCCTGTCTCAGCTCCACCAAGGGCCCATCGT                                                                                                                                                                                                         |
| 245_I_GHV1-69D_I_GHJ4 | ATCACGTAACAACCACATCTCCTCTATAGAAGCCCTGGGAGCACAGCTCTGACCATGACTGACCTGGAGTTCCTCTTGTGTGGCAGCAGTACAGGTGTCGGTCCCAGTGCAGTGTGTCAGTCTGGGGCTGAGGTAAAGGAGCCTGGGTCTCGGTGAAAGTCTCCTGCAAGGCTTCTGAGGACACTTCCAGCAGTATGCTTTCACTGGGTGCGACAGGCCCTGGACAAGGGCTTGAAGTGGATGGGAGGAATCATGCTCTATTGTTGGAACAAGAACTACGCACAGAAAGTTCAGGGTAGAGTACGATTACCGCGACGAATCCACGAGCAGCTTACATGAGCTGAGCAGCCTGAGATCTGAGGACACGGCCGTATTATTGTGCGAGAACTTTATTATGATAACAGTGGCTATTATTGGGCCAGGAACTCCTGTCCAGTCTCCTCAGCATCCCCACCAGCCCCAAGTCTTCCCCTGAGCCTCTGAGCACACCAGCCAGATGGGAACGTGTCATCGCCTGCTGTCAGGCGCTTCCCCCAGGAGCCACTCAGTGTGACTGGAGCGAAAGCGACAGGGCGTGACCCAGAACTCCC                                                                                              |
| 245_I_GHV1-69D_I_GHJ4 | ATCACATACAACCACATCTCCTCTAAAGAAGCCCTGGGAGCACAGCTCATCACCATGACTGACCTGGAGTTCCTCTTGTGTGGCAGCAGTACAGGTGTCAGTCCCAGTGCAGCTGGTGCAGTCTGGGGCTGAAGTGAAGAGCCTGGGTCTCGGTGAAGTCTCCTGCAAGGCTTCTGAGGACACTTCCAGCAGTACGTTACGTTTTCAGCTGGTGGCGACAGGCCCTGGACAAGGGCTTGAAGTGGATGGGAGGAATCATGCTCTATTGTTGACAGTAAATACGCACAGAGTTCAGGGCAGAGTACGATTCCGCGCCGAATCCACGAGCACAGCTTACATGAGCTGAGCAGCCTGAGATCTGAGGACACGGCCATGATTACTGTGTGAGAACTTTACTATGATAAAGTGGTATTACTGGGGCCAGGAACTCCGGTACCCTGTCTCAGCATCCCCACCAGCCCCAAGTCTTCCCCTGAGCCTCTGAGCACCAGCCAGATGGGAACGTGTCATCGCCTGCTGTCAGGCGCTTCCCCCAGGAGCCACTCAGTGTGACTGGAGCGAAAGCGACAGGGCGTGACCCAGAACTCCC                                                                                               |
| 35_I_GHV3-23_I_GHJ4   | AGCTCTGAGAGAGGAGCCAGCCCTGGGATGTTCAAGTGTGTTTCACTTGGTGATCAGCACTGAAACAGAGAACTACCATTGAGTTTGGGCTGAGTGGTTTTCTTGTGCTATTTAAAGGTGTCCAGTGTGAGGTGCAGCTGGTGGACTCTGGGGAGGCTTGTACACGCGGGGTGTCCTGAGACTCTCCTGTGAGCCTCTGATTCACTTTCAGCTATGCCATGAGTTGGTCCGTCAGGCTCCAGGGAAGGGCTGGAGTGGTCTCAGTATAAGTGGTAGTGGTGGCACTTACTACGCAGACTCCGTGAGGGCCGGTTCACCATCTCCAGAGACAATCCAAGCAAATCTGTCTCTGCAATGAACAGCCTGAGAGCCGAGGACACGGCCGTTTACTGTGCGAGAGGTGGCAGGGCTGGTAAATACGGCGGAAATGTGACTACTGGGCCAGGAACTCCGTGGTACCCTGTCTCAGCATCCCCACCAGCCCCAAGTCTTCCCCTGAGCCTCTCAGCCTCCACCAAGGGCCCATCGTCTTCCCCTGGCACCTCTCCAAGAGCACCTCTGGGGCACAGCGCCCTGGGCTGCTGGTCAAGGACTACTCCCCAACCGGTGACGGTGTCTGTGAAGTCCAGGCGCCCTGACCAGCGCGTGCACACCTTCCCGCTGTCTACAGTCTCAGGA      |
| 35_I_GHV3-23_I_GHJ4   | GAGAGAGGAGCCAGCCCTGGGATGTTCAAGTGTGTTTCACTTGGTGATCAGCACTGAAACAGAGAACTACCATTGAGTTTGGGCTGAGTGGTTTTCTTGTGCTATTTAAAGGTGTCAAGACTGAGGTGCAACTGGTGGACTCTGGGGAGGCTTGTACAGCGGGGCTGCTGAGACTCTCCTGTGAGCCTCTGATTCACTTTCAGCTATGCCATGAGTTGGTCCGTCAGGCTCCAGGGAAGGGCTGGAGTGGTCTCAGTATAAGCGTAGTGGTGGCACTTACTACGCAGACTCCGTGAGGGCCGGTCCACCATCTCCAGAGACAATCCAAGCAAATCTGTCTCTGCAATGAACAGCCTGAGAGCCGAGGACACGGCCGTTTACTGTGCGAGAGCGGAGGGCTGGTGAATACGGCGGAAATGTGACTACTGGGCCAGGAACTCCGTGGTACCCTGTCTCAGCCTCCACCAAGGGCCCATCGTCTTCCCCTGGCACCTCTCCAAGAGCACCTCTGGGGCACAGCGCCCTGGGCTGCTGGTCAAGGACTACTCCCCAACCGGTGACGGTGTCTGTGAAGTCCAGGCGCCCTGACCAGCGCGTGCACACCTTCCCGCTGTCTACAGTCTCAGGA                                                        |
| 38_I_GHV3-73_I_GHJ4   | AGGTCGTGGAGAGGAGCTCCAGCCTTGGATTCCCAGCTGTCGCACTCGGTGTCGCACTGAAACAGAGACTACCATTGAGTTTGGGCTGAGTGGTTTTCTTGTGCTATTTAAAGGTGTCCAGTGTGAGGTGCAGCTGGTGGAGTCCGGGGAGGCTTGGTCCAGCCTGGGGCTCCGAACTCTCCTGTGAGCCTCTGGGTTCAAGTTCAGTGGCTCTGTATGACTGGTCCGCGAGCTCCGCGAAAGGGCTGGAGTGGTGGCCGATTAGAAGCAACGCTAACAACTACGCGACAGCATATGGTGGTGGTGAAGGACAGGTTACCATTCCAGAGATGATTCAAAGAACACGGCGTATCTGCAATGAACAGCCTGAAATCGAGGACACGGCCGTTTACTGTGCGAGAGCGGAGGGCTGGTGAATACGGCGGAAATGTGACTACTGGGCCAGGAACTCCGTGGTACCCTGTCTCAGCCTCCACCAAGGGCCCATCGTCTTCCCCTGGCACCTCTCCAAGAGCACCTCTGGGGCACAGCGCCCTGGGCTGCTGGTCAAGGACTACTCCCCAACCGGTGACGGTGTCTGTGAAGTCCAGGCGCCCTGACCAGCGCGTGCACACCTTCCCGCTGTCTACAGTCTCAGGA                                             |



|                       |                                                                                                                                                                                                                                                                                                                                                                                                                                                                                                                                                                                                                                                                                        |
|-----------------------|----------------------------------------------------------------------------------------------------------------------------------------------------------------------------------------------------------------------------------------------------------------------------------------------------------------------------------------------------------------------------------------------------------------------------------------------------------------------------------------------------------------------------------------------------------------------------------------------------------------------------------------------------------------------------------------|
| 54_I_GHV4-61_I_GHJ4   | GCGAGTGTTCCTATATGAGGGAGGGTCTGCTCACATGGAATACTTTCTGAGAGTCTGGACCTCTGTGCAAGAACATGAAACACCTGTGTTCTTCTCTGCTGGTGGCAGCTCCCAGATGGTCTCTGCCAGATGAGCTGAGAGTCCGGGCCAGGACTGGTGAAGCCTTCAGAGACCCCTGCCCTCACCTGACTGTCTGGTGGCTCCATCACCACTGATGATTACTCTGGAGCTGGATCCGCCAGCACCCAGGAGGGCTGGAAATGGATCGGGTACACTATAAACATGGAAATCACCAACTTCAACCCGTCCCTCAGGATCGACTAGCATGTGACAGCTTAAAGAACCTTCTCCCTGAAGCTGAGCTGTGACTGCCGGACACGCCATTTATTTCTGTGCGAGAGAGGATACTGTAATGAAGAACCTGCTTCTGGCTTTTACTCTGCTGGGGCCAGGGAGCCCTGTTATTGTCTCTCAGCTCCACCAAGGCCATCGTCTCCCCCTGCACCCCTCTCCAAGAGCACCTCTGGGGCACAGCGCCCTGGCTGCTGGTCAAGGACTACTCCCCAACCCGTGACGGTGTCTGTGAACCTCAGCGCCCTGACCAGCGCGTGCACACCTTCCCGCTGTCTACAGTCTCAGGA                      |
| 54_I_GHV4-61_I_GHJ4   | ACCTGTCATACAGAGGCCACCACCCACATGCAAACTCACTTAGGCCACCCACAGAAAACCCACACATTTCTTAAATCAGGGTCTGCTCACATGGAATACTTTCTGAGAGTCTGGACCTCTGTGCAAGAACATGAAACACCTGTGTTCTTCTCTGCTGGTGGCAGCTCCAGATGGTCTCTGCCAGATGAGCTGCGAGAGTCCGGCCAGACTGGTGAAGCCTTCAGAGACCCCTGCTCCCTCACCTGACTGTCTAGTGGCTCCATGACCAGTGTATTACTACTGAGCTGGATCCGCCAGCACCCAGGAGGGCTGGAAATGGATCGGGTACATATAAACATGGAAATCACCAACTTCAACCCGTCCCTCAGGAGTGCAGTGTAGCATGTGACTGCCGGACACGCCATTTATTTCTGTGCGAGAGAGGATACTGTAATGAAGAACCTGCTTCTGGCTTTTACTCTGCTGGGGCCAGGGAGCCCTGTTATTGTCTCTCAGCTCCACCAAGGCCATCGTCTCCCCCTGCACCCCTCTCCAAGAGCACCTCTGGGGCACAGCGCCCTGGCTGCTGGTCAAGGACTACTCCCCAACCCGTGACGGTGTCTGTGAACCTCAGCGCCCTGACCAGCGCGTGCACACCTTCCCGCTGTCTACAGTCTCAGGA  |
| 54_I_GHV4-61_I_GHJ4   | CTTTCTATATGAGGGAGGGTCTGCTCACATGGAATACTTTCTGAGAGTCTGGACCTCTGTGCAAGAACATGAAACACCTGTGTTCTTCTCTGCTGGTGGCAGCTCCCAGATGGTCTTCCAGATGAGCTGAGAGTCCGGGCCAGGACTGGTGAAGCCTTCAGAGACCCCTGCCCTCACCTGACTGTCTGTGGTGGCTCCATCAGCAGTGTATTACTACTGAGCTGGATCCGCCAGCACCCAGGAGGGCTGGAAATGGATCGGGTACATATAAACATGGAAATCACCAACTTCAACCCGTCCCTCAGGAGTGCAGTGTAGCATGTGACTGCCGGACACGCCATTTATTTCTGTGCGAGAGAGGATACTGTAATGAAGAACCTGCTTCTGGCTTTTACTCTGCTGGGGCCAGGGAGCCCTGTTATTGTCTCTCAGCTCCACCAAGGCCATCGTCTCCCCCTGCACCCCTCTCCAAGAGCACCTCTGGGGCACAGCGCCCTGGCTGCTGGTCAAGGACTACTCCCCAACCCGTGACGGTGTCTGTGAACCTCAGCGCCCTGACCAGCGCGTGCACACCTTCCCGCTGTCTACAGTCTCAGGA                                                                 |
| 74_I_GHV3-15_I_GHJ3   | CTCCCTCTCTGATGAAAACCCAGCCCAGTCTGACCCCTGAGCTGTGGAGAGAGAGCCCCAGCCTTGGATTCCCAAGTGTCTTTCATTGATGATCAGGACTGAACACAGAGGACTCACCATGGAGTTTGGCTGAACCTGATTTTCTTGTGCTATTTAAAGTGTCCAGTGTGAGGTGAGCTGGTGGCTCTGGGGAGGCTGGTAAACCCGGGGGCTCTTACACTCTCTGTGAAGCCTCTGGATTCAATTTAGTAACTCTGATGAGTTGGTCCGCCAGGCTCCAGGGAAGGGCTGGAGTGGTTGGCCGTGTTAAAGCAAACCTGATGGTGGACACCCAGACTCGCTGACCCCGTAAAGGAGCAGTGTCAAGAGTATTCAAAAACACATTTCTCTGCAATGAACAGCCTGAAAACCGAGACACAGCCGTGATTATTGTTAAAGTCGATAGAGGAGGGCTTTGATATCTGGGCCAAGGGACATTGGTCAACCGTCTCTCAGCCTCCACCAAGGCCATCGTCTCCCCCTGCACCCCTCTCCAAGAGCACCTCTGGGGCACAGCGCCCTGGCTGCTGGTCAAGGACTACTCCCCAACCCGTGACGGTGTCTGTGAACCTCAGCGCCCTGACCAGCGCGTGCACACCTTCCCGCTGTCTACAGTCTCAGGA |
| 74_I_GHV3-15_I_GHJ3   | ATGGGGGGAGAGGAGCCAGCCTTGGATTCCCAAGTGTCTTTCATTGATGATCAGGACTGAACACAGAGGACTCACCATGGAGTTGGGGCTGAACCTGATTTTCTGCTGCTATTTAAAGTGTCCAGTGTGAGGTGAGCTGGTGGCTGGGGAGGCTGGTAAACCCGGGGGCTCTTACACTCTCTGTGAAGCCTCTGGATTCAATTTAGTAACTCTGATGAGTTGGTCCGCCAGGCTCCAGGGAAGGGCTGGAGTGGTTGGCCGTGTTAAAGTAATCTGATGTTGGCTCACAGACTACCGTGCACCCGTGAAGGAGATTGAGCTCAAGAGTATTCAAAAACACATTTCTCTGACATGAACAGCCTGAAAACCGAGACACAGCCATGATTACTGTGTTAAAGTCGATAGAAGGAGGCTTTTATCTGCTGGGCCAAGGGACGATGTCACCGTCTCTCAGCCTCCACCAAGGCCATCGTCTCCCCCTGCACCCCTCTCCAAGAGCACCTCTGGGGCACAGCGCCCTGGCTGCTGGTCAAGGACTACTCCCCAACCCGTGACGGTGTCTGTGAACCTCAGCGCCCTGACCAGCGCGTGCACACCTTCCCGCTGTCTACAGTCTCAGGA                                          |
| 80_I_GHV1-2_I_GHJ3    | GAGAGCATCACCCAGCAACACATCTGTCTCTAGAGAAATCCCTGAGAGTCCGTTCTCACCATGAGACTGGACCTGGAGGATCCTCTTCTGGTGGCAGCAGCCACAGAGCCCACTCCCAGGTGAGATGGTGCAGTCTGGGGCTGAGGTGAAGAGCCTGGGCCTCATGTAAGGTCTCCTGCAAGGCTTCTGATACACTTACCCTGACTATTTGCACTGGGTGCGACAGGCCCTGGACAAGGGCTTGGAGTGGATGGCATGATGACACCTAACCCGTGGTGGCACAACATGACAAAAGTTTTCAGGGCAGGGTACCTTGACCAGGGACACGTCATCACACAGCCTACATGGAACCTGAGCAGGCTGAGATCTGACGACACGGCCGTGTAATCTGCGAGAGATATCGTAACCTGGAACACCAAAATGATGCTTTTATCTGCTGGGGCCAGGGACAATGTCACCGTCTCTCAGCATCCCCAGCCCAAGGCTCTCCGCTGAGCCTCTGAGCACCAGCCAGATGGAAACGTGGTATCGCTGCTGGTCCAGGGCTTCTCCCCAGGAGCCACTCAGTGTGACCTGGAGCGAAAGCGGACAGGGCTGACCCCAGAAACTTCCC                                                  |
| 80_I_GHV1-2_I_GHJ3    | GAGAGCATCACCCAGCAACACATCTGTCTCTAGAGAAATCCCTGAGAGTCCGTTCTCACCATGAGACTGGACCTGGAGGATCCTCTTCTGGTGGCAGCAGCCACAGAGCCCACTCCCAGGTGAGATGGTGCAGTCTGGGGCTGAGGTGAAGAGCCTGGGCCTCATGTAAGGTCTCCTGCAAGGCTTCTGATACACTTACCCTGACTATTTGCACTGGGTGCGACAGGCCCTGGACAAGGGCTTGGAGTGGATGGCATGATGACACCTAACCCGTGGTGGCACAACATTTGACAAAAGTTTTCAGGGCAGGGTACCTTGACCAGGGACACGTCATCACACAGCCTACATGGAACCTGAGCAGGCTGAGATCTGACGACACGGCCGTGTAATCTGCGAGAGATATCGTAACCTGGAACACCAAAATGATGCTTTTATCTGCTGGGGCCAGGGACAATGTCACCGTCTCTCAGCCTCCACCAAGGGCCATCGTCTCCCCCTGGCACCCCTCTCCAAGAGCACCTCTGGGGCACAGCGCCCTGGCTGCTGGTCAAGGACTACTCCCCAACCCGTGACGGTGTCTGTGAACCTCAGCGCCCTGACCAGCGCGTGCACACCTTCCCGCTGTCTACAGTCTCAGGA                        |
| 80_I_GHV1-2_I_GHJ3    | GGGAGCATCACCCAGCAACACATCTGTCTCTAGAGAAATCCCTGAGAGTCCGTTCTCACCATGAGACTGGACCTGGAGGATCCTCTTCTGGTGGCAGCAGCCACAGAGCCCACTCCCAGGTGAGATGGTGCAGTCTGGGGCTGAGGTGAAGAGCCTGGGCCTCATGTAAGGTCTCCTGCAAGGCTTCTGATACACTTACCCTGACTATTTGCACTGGGTGCGACAGGCCCTGGACAAGGGCTTGGAGTGGATGGCATGATGACACCTAACCCGTGGTGGCACAACATTTGACAAAAGTTTTCAGGGCAGGGTACCTTGACCAGGGACACGTCATCACACAGCCTACATGGAACCTGAGCAGGCTGAGATCTGACGACACGGCCGTGTAATCTGCGAGAGATATCGTAACCTGGAACACCAAAATGATGCTTTTATCTGCTGGGGCCAGGGACAATGTCACCGTCTCTCAGCCTCCACCAAGGGCCATCGTCTCCCCCTGGCACCCCTCTCCAAGAGCACCTCTGGGGCACAGCGCCCTGGCTGCTGGTCAAGGACTACTCCCCAACCCGTGACGGTGTCTGTGAACCTCAGCGCCCTGACCAGCGCGTGCACACCTTCCCGCTGTCTACAGTCTCAGGA                        |
| 20_I_GHV4-30-2_I_GHJ5 | GGGGAGGTCTGCTCACATGGAATACTTTCTGAGAGTCTGGACCTCTGTGCAAGAACATGAAACACCTGTGTTCTTCTCTGCTGGTGGCCAGTCCCAGATGGTCTGCCCAGGTGAGCTGCGAGAGTCCGGGCCAGGACTGGTGAAGCCTTACAGACCCCTGCTCCCTCAGTGTCTGTGGCTCCATCAACAGTGGTATTACTACTGAGTTGGATCCGCCAGCCCCAGGAGGGCTGGAGTGGATTGGTACATGTAATCCAGTGGGATCAACTACCACAACCCGTCCCTCAAGAGTGCAGTACCATATCAGAGACAGTCAAGAACCTGATCCCTGAACCTGAACTCTGTGACTGCCGACACAGCCGTGTAATCTGCGAGAGATATCGTAACCTGGAACACCAAAATGATGCTTTTATCTGCTGGGGCCAGGGACAATGTCACCGTCTCTCAGCCTCCACCAAGGGCCATCGTCTCCCCCTGGCACCCCTCTCCAAGAGCACCTCTGGGGCACAGCGCCCTGGCTGCTGGTCAAGGACTACTCCCCAACCCGTGACGGTGTCTGTGAACCTCAGCGCCCTGACCAGCGCGTGCACACCTTCCCGCTGTCTACAGTCTCAGGA                                              |
| 20_I_GHV4-30-2_I_GHJ5 | GGTAGATGATTTCTATATGAGGGAGGGTCTGCTCACATGGAATACTTTCTGAGAGTCTGGACCTCTGTGCAAGAACATGAAACACCTGTGTTCTTCTCTGCTGGTGGCCAGTCCCAGATGGTCTGCCCAGGTGAGCTGCGAGAGTCCGGGCCAGGACTGGTGAAGCCTTACAGACCCCTGCTCCCTCAGTGTCTGTGGCTCCATCAACAGTGGTATTACTACTGAGTTGGATCCGCCAGCCCCAGGAGGGCTGGAGTGGATTGGTACATGTAATCCAGTGGGATCAACTACCACAACCCGTCCCTCAAGAGTGCAGTACCATATCAGAGACAGTCAAGAACCTGATCCCTGAACCTGAACTCTGTGACTGCCGACACAGCCGTGTAATCTGCGAGAGATATCGTAACCTGGAACACCAAAATGATGCTTTTATCTGCTGGGGCCAGGGACAATGTCACCGTCTCTCAGCCTCCACCAAGGGCCATCGTCTCCCCCTGGCACCCCTCTCCAAGAGCACCTCTGGGGCACAGCGCCCTGGCTGCTGGTCAAGGACTACTCCCCAACCCGTGACGGTGTCTGTGAACCTCAGCGCCCTGACCAGCGCGTGCACACCTTCCCGCTGTCTACAGTCTCAGGA                          |

|                      |                                                                                                                                                                                                                                                                                                                                                                                                                                                                                                                                                                                                                                                                            |
|----------------------|----------------------------------------------------------------------------------------------------------------------------------------------------------------------------------------------------------------------------------------------------------------------------------------------------------------------------------------------------------------------------------------------------------------------------------------------------------------------------------------------------------------------------------------------------------------------------------------------------------------------------------------------------------------------------|
| 94_I_GHV3-23_I_GHJ4  | AGCTCTGAGAGAGAGCCCAGCCCTGGGATTTTCAGCGCTTTTCATTGGTGATCAGGACTGAACAGAGAGAAGCTCACCATTGGAGTTGGGCTGAGCTGGCTTTTCTTGTTGCTATTTTAAAAGGTGCCAGTGTGAGGTGCAGTTGGTGGAGTCTGGGGAGGCGTGTACAGCCTGGGGGTCCTGAGACTCTCCTGTGCAGCCTCTGATTACCTTTAGAAATATGCCATGAGCTGGTCCGCGAGGCTCCAGGAAAGGGCCGAGTGGGTCTCAGAAATTAGTGTAGTGGGATGACATACTACGACACTCCGAGAAAGGCCGGTTCACCATCTCCAGAGACAACCTCAAAGAGCACGGTGTCTGCAAATGAGCAGCCTGAGAGCCGAGGACACGGCCATATATTACTGTGCGAAAGCTACTATAGCGGGAGGTAGTGGGGCTCCTATGACTACTGGGGCCAGGAAACCTGTTCCGTCTCCTCAGCTCCACCAAAGGGCCCATCGTCTTCCCCTGGCACCTCTCCAAGAGCACCTCTGGGGCACAGCGCCCTGGGCTGCTGTCAAGGACTACTCCCCAACCGGTGACGGTGTCTGTGAACTCAGGCGCCCTGACCAGCGCGTGCACACCTTCCCCTGTCTACAGTCTCAGGA    |
| 94_I_GHV3-23_I_GHJ4  | AGCTCTGAGAGAGAGCCCAGCCCTGGGATTTTCAGCGCTTTTCATTGGTGATCAGGACTGAACAGAGAGAAGCTCACCATTGGAGTTGGGCTGAGCTGGCTTTTCTTGTTGCTATTTTAAAAGGTGCCAGTGTGAGGTGCAGTTGGTGGAGTCTGGGGAGGCGTGTACAGCCTGGGGGTCCTGAGACTCTCCTGTGCAGCCTCTGATTACCTTTAGAAATATGCCATGAGCTGGTCCGCGAGGCTCCAGGAAAGGGCCGAGTGGGTCTCAGAAATTAGTGTAGTGGGATGACATACTACGACACTCCGAGAAAGGCCGGTTCACCATCTCCAGAGACAACCTCAAAGAGCACGGTGTCTGCAAATGAACAGCCTGAGAGCCGAGGACACGGCCATATATTACTGTGCGAAAGCTACTATAGCGGGAGGTAGTGGGGCTCCTATGACTACTGGGGCCAGGAAACCTGTTCCACCGTCTCCTCAGCTCCACCAAGGGCCCATCGTCTTCCCCTGGCACCTCTCCAAGAGCACCTCTGGGGCACAGCGCCCTGGGCTGCTGTCAAGGACTACTCCCCAACCGGTGACGGTGTCTGTGAACTCAGGCGCCCTGACCAGCGCGTGCACACCTTCCCCTGTCTACAGTCTCAGGA  |
| 94_I_GHV3-23_I_GHJ4  | AGCTCTGAGAGAGAGCCCAGCCCTGGGATTTTCAGCGCTTTTCATTGGTGATCAGGACTGAACAGAGAGAAGCTCACCATTGGAGTTGGGCTGAGCTGGCTTTTCTTGTTGCTATTTTAAAAGGTGCCAGTGTGAGGTGCAGTTGGTGGAGTCTGGGGAGGCGTGCACAGCCTGGGGGTCCTGAGACTCTCCTGTGCAGCCTCTGATTACCTTTAGAAATATGCCATGAGCTGGTCCGCGAGGCTCCAGGAAAGGGCCGAGTGGGTCTCAGAAATTAGTGTAGTGGGATGACATACTACGACACTCCGAGAAAGGCCGGTTCACCATCTCCAGAGACAACCTCAAAGAGCACGGTGTCTGCAAATGAGCAGCCTGAGAGCCGAGGACACGGCCATATATTACTGTGCGAAAGCTACTATAGCGGGAGGTAGTGGGGCTCCTATGACTACTGGGGCCAGGAAACCTGTTCCCGTCTCCTCAGCTCCAC                                                                                                                                                                    |
| 94_I_GHV3-23_I_GHJ4  | AGCTCTGAGAGAGAGCCCAGCCCTGGGATTTTCAGCGCTTTTCATTGGTGATCAGGACTGAACAGAGAGAAGCTCACCATTGGAGTTGGGCTGAGCTGGCTTTTCTTGTTGCTATTTTAAAAGGTGCCAGTGTGAGGTGCAGTTGGTGGAGTCTGGGGAGGCGTGTACAGCCTGGGGGTCCTGAGACTCTCCTGTGCAGCCTCTGATTACCTTTAGAAATATGCCATGAGCTGGTCCGCGAGGCTCCAGGAAAGGGCCGAGTGGGTCTCAGAAATTAGTGTAGTGGGATGACATACTACGACACTCCGAGAAAGGCCGGTTCACCATCTCCAGAGACAACCTCAAAGAGCACGGTGTCTGCAAATGAACAGCCTGAGAGCCGAGGACACGGCCATATATTACTGTGCGAAAGCTACTATTGCGGGAGGTAGTGGGGCTCCTATGACTACTGGGGCCAGGAAACCTGTTCCACCGTCTCCTCAGCTCCACCAAAGGGCCCATCGTCTTCCCCTGGCACCTCTCCAAGAGCACCTCTGGGGCACAGCGCCCTGGGCTGCTGTCAAGGACTACTCCCCAACCGGTGACGGTGTCTGTGAACTCAGGCGCCCTGACCAGCGCGTGCACACCTTCCCCTGTCTACAGTCTCAGGA |
| 94_I_GHV3-23_I_GHJ4  | ATGGGGAGAGAGAGCCCAGCCCTGGGATTTTCAGGTGTTTCATTGGTGATCAGGACTGAACAGAGAGAAGCTCACCATTGGAGTTGGGCTGAGCTGGCTTTTCTTGTTGCTATTTTAAAAGGTGCCAGTGTGAGGTGCAGTTGGTGGAGTCTGGGGAGGCGTGTACAGCCTGGGGGTCCTGAGACTCTCCTGTGCAGCCTCTGATTACCTTTAGAAATATGCCATGAGCTGGTCCGCGAGGCTCCAGGAAAGGGCCGAGTGGGTCTCAGAAATTAGTGTAGTGGGATGACATACTACGACACTCCGAGAAAGGCCGGTTCACCATCTCCAGAGACAACCTCAAAGAGCACGGTGTCTGCAAATGAACAGCCTGAGAGCCGAGGACACGGCCGTATATTACTGTGCGAAAGCTACTATAGCGGGAGGTAGTGGGGCTCCTATGACTACTGGGGCCAGGAAACCTGTTCCACCGTCTCCTCAGCTCCACCAAAGGGCCCATCGTCTTCCCCTGGCACCTCTCCAAGAGCACCTCTGGGGCACAGCGCCCTGGGCTGCTGTCAAGGACTACTCCCCAACCGGTGACGGTGTCTGTGAACTCAGGCGCCCTGACCAGCGCGTGCACACCTTCCCCTGTCTACAGTCTCAGGA   |
| 119_I_GHV3-21_I_GHJ4 | AGCTCTGAGAGAGAGCCTTAGCCCTGATTCCAAGGCCTATCCACTTGGTGATCAGCACTGAGCACCGAGGATTACCATGGAAGTGGGCTCCGCTGGGTTTTCTTGTGCAATTTAGAAAGGTGCCAGTGTGACGTACAGCTGGTGAATCTGGGGAGGCGTGGTGCAGCCGGGGGTCCTGAGACTCTCCTGTGCAGCCTCTGATTACCTTCAATTTATACCATCAACTGGGTCGCGAGGCGCCAGGAAAGGGACTGGAGTGGTCTCAGCCATCACCAGTAGTAATAATCTATTACGACAGACTCAGTGGGGCCGATTACCATCTCAGAGACAACGTCAAAGAACTCAATGTATCTCCAATGAACAGCCTGAGAGCCGAGGACACGGCTGTATATTACTGCGGAGACTGGGCATTTTTTTGATAGTAGTGTGATTGCGTTATTGGGGCCCGGAAACCCAGTCCAGGTTCTCCTCAGCTCCACCAAGGCCCATCGTCTTCCCCTGGCGCCCTGCTCCAGGAGCACCTCCGAGAGCACAGCCGCTGGGCTGCTGTCAAGGACTACTCCCCAACCGGTGACGGTGTCTGTGAACTCAGGCGCCCTGACCAGCGCGTGCACACCTTCCCCTGTCTACAGTCTCAGGA           |
| 119_I_GHV3-21_I_GHJ4 | AGCTCTGAGAGAGAGCCTTAGCCCTGATTCCAAGGCCTATCCACTTGGTGATCAGCACTGAGCACCGAGGATTACCATGGAAGTGGGCTCCGCTGGGTTTTCTTGTGCAATTTAGAAAGGTGCCAGTGTGACGTACAGCTGGTGAATCTGGGGAGGCGTGGTGCAGCCGGGGGTCGCTGAGACTCTCCTGTGCAGCCTCTGATTACCTTCAATTTATACCATCAACTGGGTCGCGAGGCGCCAGGAAAGGGACTGGAGTGGTCTCAGCCATCACCAGTAGTAATAATTTATATTACGACAGACTCAGTGGGGCCGATTACCATCTCCAGAGACAACGTCAAAGAACTCATGTATCTCCAATGAACAGCCTGAGAGCCGAGGACACGGCTGTATATTACTGCGGAGACTGGGCATTTTTTTGATAGTAGTGTGATTGCGTTATTGGGGCCCGGAAACCCAGTCCAGGTTCTCCTCAGCTCCACCAAGGCCCATCGTCTTCCCCTGGCGCCCTGCTCCAGGAGCACCTCCGAGAGCACAGCCGCTGGGCTGCTGTCAAGGACTACTCCCCAACCGGTGACGGTGTCTGTGAACTCAGGCGCCCTGACCAGCGCGTGCACACCTTCCCCTGTCTACAGTCTCAGGA        |
| 119_I_GHV3-21_I_GHJ4 | AGCTCTGAGAGAGAGCCTTAGCCCTGATTCCAAGGCCTATCCACTTGGTGATCAGCACTGAGCACCGAGGATTACCATGGAAGTGGGCTCCGCTGGGTTTTCTTGTGCAATTTAGAAAGGTGCCAGTGTGACGTACAGCTGGTGAATCTGGGGAGGCGTGGTGCAGCCGGGGGTCGCTGAGACTCTCCTGTGCAGCCTCTGATTACCTTCAATTTATACCATCAACTGGGTCGCGAGGCGCCAGGAAAGGGACTGGAGTGGTCTCAGCCATCACCAGTAGTAATAATTTATATTACGACAGACTCAGTGGGGCCGATTACCATCTCCAGAGACAACGTCAAAGAACTCATGTATCTCCAATGAACAGCCTGAGAGCCGAGGACACGGCTGTATATTACTGCGGAGACTGGGCATTTTTTTGATAGTAGTGTGATTGCGTTATTGGGGCCCGGAAACCCAGTCCAGGTTCTCCTCAGCTCCACCAAGGCCCATCGTCTTCCCCTGGCGCCCTGCTCCAGGAGCACCTCCGAGAGCACAGCCGCTGGGCTGCTGTCAAGGACTACTCCCCAACCGGTGACGGTGTCTGTGAACTCAGGCGCCCTGACCAGCGCGTGCACACCTTCCCCTGTCTACAGTCTCAGGA        |
| 120_I_GHV5-1_I_GHJ4  | GGAGTCTCCCTCACTGCCAGCTGGATCTCAGGCTTTCATTCTCTCCACCAGCATGGGTTCAACCCCATCTCCCTCTCCTGGTGTCTCCAAGAGTCTGTCCGAGGTGCAGTGTGTGAGTCTGGAGCAGAGGTGAAAAAGCCCGGGAGTCTCTGAAGATCTCCTGTAAAGGTTCTGGATACAGATTTACCAACTACTGATCGGCTGGTGGCGCAGATGCCGGGAAAGGCTGGAGTGGATGATCTCTGACTCTGATACCAGATACAGCCCGTCTCCAAGTGCAGTCCACATCTCAGCCGACAAGTCCATCAGCACCGCTCACTGAGCAGCTGAAGGCTCGGACACCGCCACGTATTACTGTGCGAAAGGAGGATGGCAGCAGCTGGGGGCTCTACTTGACTACTGGGGCCAGGAAACCTGGTCCAGTCTCCTCAGCTCCACCAAGGCCCATCGTCTTCCCCTGGCGCCCTGCTCCAGGAGCACCTCCGAGAGCACAGCCGCTGGGCTGCTGTCAAGGACTACTCCCCAACCGGTGACGGTGTCTGTGAACTCAGGCGCCCTGACCAGCGCGTGCACACCTTCCCCTGTCTACAGTCTCAGGA                                                    |
| 120_I_GHV5-51_I_GHJ4 | GGAGTCTCCCTCACTGCCAGCTGGATCTCAGGCTTTCATTCTCTCCACCATCATGGGTTCAACCCCATCTCCCTCTCCTGGTGTCTCCAAGAGTCTGTCCGAGGTGCAGTGTGTCAATCTGGAGCAGAGGTGAAAAAGCCCGGGAGTCTCTGAAGATCTCCTGTAAAGGTTCTGGATACAGATTTACCAACTACTGATCGGCTGGTGGCGCAGATGCCGGGAAAGGCTGGAGTGGATGATCTCTGACTCTGATACCAGATACAGCCCGTCTCCAAGTGCAGTCCACATCTCAGCCGACAAGTCCATCAGCACCGCTCACTGAGCAGCTGAAGGCTCGGACACCGCCACGTATTACTGTGCGAAAGGAGGATGGCAGCAGCTGGGGGCTCTACTTGACTACTGGGGCCAGGAAACCTGGTCCAGTCTCCTCAGCTCCACCAAGGCCCATCGTCTTCCCCTGGCACCTCTCCAAGAGCACCTCTGGGGCACAGCGCCCTGGGCTGCTGTCAAGGACTACTCCCCAACCGGTGACGGTGTCTGTGAACTCAGGCGCCCTGACCAGCGCGTGCACACCTTCCCCTGTCTACAGTCTCAGGA                                                      |



|                      |                                                                                                                                                                                                                                                                                                                                                                                                                                                                                                                                                                                                                                                                |
|----------------------|----------------------------------------------------------------------------------------------------------------------------------------------------------------------------------------------------------------------------------------------------------------------------------------------------------------------------------------------------------------------------------------------------------------------------------------------------------------------------------------------------------------------------------------------------------------------------------------------------------------------------------------------------------------|
| 60_I_GHV4-59_I_GHJ3  | ACTTTCTGAGAGTCTGTGACCTCCTGTGCAAGAACATGAAACATCTGTGGTTCTTCTCTCTCTGTTGGCAGTCCCAGATGGTCTGTCCCGGGTGCGACTGCGAGAGTCGGGCCAGGACTGGTGAAGCCTTCGGAGACCTGTCCCTCACCTGCGCTGTCTGTGGTGGTCCGTGAGTAGTTCATTGACTTGGATCCGGCAGTCCCAGGAAGGGACTGGAAATGGCTATATCTATTCAGTGGGACCAACATTAACAACCCCTCCCTGAGAGTCCACATATCAATGACACGTCGAAACAACAGTTCCCTGAACTGAGCTGTGACCGCTGCGACACGGCCGTCTTACTGTGCGAGAGATCGACAATGATGCTTAGTGGAAAGCTTGTATGTCTGGGCCAGGGACAGTGGTACCCTCTCTCAACCTCCACCAAGGCCATCGTCTTCCCCTGGCACCTCTCCAAGAGCACCTCTGGGGCACAGCGGCCCTGGCTGCAAGGACTACTCCCGAACCGGTGACGGTGTGCGAACTCAGCGCCCTGACCAGCGCGTGCACACCTCCCGCTGTCTACAGTCTCAGGA                                                                |
| 61_I_GHV1-24_I_GHJ4  | ACCATCACAAACAGCCACATCCCTCCCCTACAGAAGCCCCAGAGCGCAGCACCTCACCATGGACTGCACCTGGAGGATCCTCTTCTGTGGTGCATCAGCTACAGGCACCCAGGTGAGTCCAGTGTACAATCTGGGGCTCAGGTGAAGAAGCCTGGGACCTCTGTGAGGGTCTCTGCAAGGTTTCCGGATACACCGTCAGTGAATATCCATGCACTGGTGGACAGGCTCCTGGAAAAGGGCTTGTAGTGGATGGGAGGATTTGATCCTGAAGATGGTGAACAATCTACGACCAGAAATTAAGGGCAGAGTACCATGACCGAGACACATCTACTGACACAGCCTACATGGAGCTTACCAGCCTGAGACCTGAGGACACGGCCCTCTTACTGTGCAACAGACCTAATCTTTTGTACTGGCTACTACATTAGAGACTACTGGGCCAGGAAACCTGGTACCCTCTCCTCAGCCTCCACCAAGGCCCATCGTCTTCCCCTGGCACCTCTCCAAGAGCACCTCTGGGGCACAGCGCCCTGGCTGCTGCTGCAAGGACTACTTCCCGAACCGGTGACGGTGTGCTGGAACCTCAGCGCCCTGACCAGCGCGTGCACACCTTCCCGCTGTCTACAGTCTCAGGA    |
| 61_I_GHV1-24_I_GHJ4  | ACCATCACAAACAGCCACATCCCTCCCCTACAGAAGCCCCAGAGCGCAGCACCTCACCATGGACTGCACCTGGAGGATCCTCTTCTGTGGTGCATCAGCTACAGGCACCCAGGTGAGTCCAGTGTACAATCTGGGGCTCAGGTGAAGAAGCCTGGGACCTCTGTGAGGGTCTCTGCAAGGTTTCCGGATACACCGTCAGTGAATATCCATGCACTGGTGGACAGGCTCCTGGAAAAGGGCTTGTAGTGGATGGGAGGATTTGATCCTGAAGATGGTGAACAATCTACGACCAGAAATTAAGGGCAGAGTACCATGACCGAGACACATCTACTGACACAGCCTACATGGAGCTTACCAGCCTGAGACCTGAGGACACGGCCCTCTTACTGTGCAACAGACCTAATCTTTTGTACTGGCTACTACATTAGAGACTACTGGGCCAGGAAACCTGGTACCCTCTCCTCAGCCTCCACCAAGGCCCATCGTCTTCCCCTGGCACCTCTCCAAGAGCACCTCTGGGGCACAGCGCCCTGGCTGCTGCTGCAAGGACTACTTCCCGAACCGGTGACGGTGTGCTGGAACCTCAGCGCCCTGACCAGCGCGTGCACACCTTCCCGCTGTCTACAGTCTCAGGA    |
| 61_I_GHV1-24_I_GHJ4  | GGGATCACAAACAGCCACATCCCTCCCCTACAGAAGCCCCAGAGCGCAGCACCTCACCATGGACTGCACCTGGAGGATCCTCTTCTGTGGTGCATCAGCTACAGGCACCCAGGTGAGTCCAGTGTACAATCTGGGGCTCAGGTGAAGAAGCCTGGGACCTCTGTGAGGGTCTCTGCAAGGTTTCCGGATACAAAGTCACTGAATATCCATGCACTGGTGGACAGGCTCCTGGAAAAGGGCTTGTAGTGGATGGGAGGATTTGATCCTGAGATGGTGAACAATCTACGACCAGAAATTAAGGGCAGAGTACCATGACCGAGACACATCTACTGACACGGCCTACATGGAGCTTACCAACCTGACACCTGAAGACACGGCCCTGTATTACTGTGCAACAGACCTATTCTTTTGTACTGGCTACTATATTAGAGACTACTGGGCCAGGAAACCTGGTACCCTCTCCTCAGCCTCCACCAAGGCCCATCGTCTTCCCCTGGCACCTCTCCAAGAGCACCTCTGGGGCACAGCGCCCTGGCTGCTGCTGCAAGGACTACTTCCCGAACCGGTGACGGTGTGCTGGAACCTCAGCGCCCTGACCAGCGCGTGCACACCTTCCCGCTGTCTACAGTCTCAGGA   |
| 97_I_GHV3-48_I_GHJ4  | AGCTCTCAGAGAGTGCTTAGCCCTGATTCCAAGGCATTTCACTTGTGTATCAGCACTGAACACAGAGACTCACCATGGAGTTGGGGCTGTCTGGTCTTCTTCTTGTCTATTAGAAAGTGTCCAGAGTGAAGTGCAGTGGTGGAGTCTGGGGAGGCTTGGTACAGCCTGGGGGTCCTGAACTCTCCTGCGCGCCTCTGATTCACTTCACTGCTATGCGAATGAAGTGGTCCCGCAGGCTCCAGGAAAGGGCTAGAGTGGTTCATATATTAGTAGTGTAGTAGTGGCATACTACTCAGACTCTGTGAAGGCCGATTACCATCTCCAGAGACAATGCCAAGAAAGTCTTCTGATCTGCAAAATGAACAGCCTGAGAGACGAGACAGGCTATTTTACTGTGCGAGAGTTGGGAAAGTATTATTGGGCCAGGAAACCTGGTACCCTCTCCTCAGCCTCCACCAAGGCCCATCGTCTTCCCCTGGCACCTCTCCAAGAGCACCTCTGGGGCACAGCGCCCTGGCTGCTGCTGCAAGGACTACTTCCCGAACCGGTGACGGTGTGCTGGAACCTCAGCGCCCTGACCAGCGCGTGCACACCTTCCCGCTGTCTACAGTCTCAGGA                     |
| 97_I_GHV3-48_I_GHJ4  | AGCTCTCAGAGAGTGCTTAGCCCTGATTCCAAGGCATTTCACTTGTGTATCAGCACTGAACACAGAGACTCACCATGGAGTTGGGGCTGTCTGGTGTCTTCTTGTCTATTAGAAAGTGTCCAGAGTGAAGTGCAGTGGTGGAGTCTGGGGAGGCTTGGTACAGCCGGGGGTCCTGAGACTCTCTGCGCAGCCTCGGATTCACTTCACTTCACTGCTATGCGAATGAAGCCTGAGAGACGAGACAGGCTTTTACTACTGTGCGAGAGTTGGGGTAGTATTGGGCCAGGAAACCTGGTACCCTCTCCTCAGCCTCCACCAAGGCCCATCGTCTTCCCCTGGCACCTCTCCAAGAGCACCTCTGGGGCACAGCGCCCTGGCTGCTGCTGCAAGGACTACTTCCCGAACCGGTGACGGTGTGCTGGAACCTCAGCGCCCTGACCAGCGCGTGCACACCTTCCCGCTGTCTACAGTCTCAGGA                                                                                                                                                                 |
| 97_I_GHV3-48_I_GHJ4  | AGCTCTCAGAGAGTGCTTAGCCCTGATTCCAAGGCATTTCACTTGTGTATCAGCACTGAACACAGAGACTCACCATGGAGTTGGGGCTGTCTGGTGTCTTCTTGTCTATTAGAAAGTGTCCAGAGTGAAGTGCAGTGGTGGAGTCTGGGGAGGCTTGGTACAGCCTGGGGAGTCCCTGAACTCTCCTGCGCGCCTGATTCACTTCACTTCACTGCTATGCGAATGAAGCCTGAGAGACGAGACAGGCTTTTACTACTGTGCGAGAGTTGGGGTAGTATTGGGCCAGGAAACCTGGTACCCTCTCCTCAGCCTCCACCAAGGCCCATCGTCTTCCCCTGGCACCTCTCCAAGAGCACCTCTGGGGCACAGCGCCCTGGCTGCTGCTGCAAGGACTACTTCCCGAACCGGTGACGGTGTGCTGGAACCTCAGCGCCCTGACCAGCGCGTGCACACCTTCCCGCTGTCTACAGTCTCAGGA                                                                                                                                                                 |
| 97_I_GHV3-48_I_GHJ4  | AGCTCTCAGAGAGTGCTTAGCCCTGATTCCAAGGCATTTCACTTGTGTATCAGCACTGAACACAGAGACTCACCATGGAGTTGGGGCTGTCTGGTGTCTTCTTGTCTATTAGAAAGTGTCCAGAGTGAAGTGCAGTGGTGGAGTCTGGGGAGGCTTGGTACAGCCTGGGGAGTCCCTGAACTCTCCTGCGCGCCTGATTCACTTCACTTCACTGCTATGCGAATGAAGCCTGAGAGACGAGACAGGCTTTTACTACTGTGCGAGAGTTGGGGTAGTATTGGGCCAGGAAACCTGGTACCCTCTCCTCAGCCTCCACCAAGGCCCATCGTCTTCCCCTGGCACCTCTCCAAGAGCACCTCTGGGGCACAGCGCCCTGGCTGCTGCTGCAAGGACTACTTCCCGAACCGGTGACGGTGTGCTGGAACCTCAGCGCCCTGACCAGCGCGTGCACACCTTCCCGCTGTCTACAGTCTCAGGA                                                                                                                                                                 |
| 107_I_GHV4-61_I_GHJ4 | TTCTTAAATTCAGGTCACAGTCCACATGGAATACTTTCTGAGAGTCTGTGACCTCCTGTGCAAGAACATGAAACACCTGTGGTCTTCTCCTCCTGTTGGCAGTCCCAGATGGTCTGTCCCAGGTGCGAGTCCGGGCCAGGACTGGTGAAGCCTTGGAGACCTGTCCCTCACCTGCTCTGTGGTACTCCGTGACCTAGTAGTCACTACTGAGCTGTGATCCGGCAGTCCCAGGAAAGGGACTGGAATGATTGGTACATTTATACAGTGGGAACAACCACTACAACCCCTCCCTCAAGAGTCACTCACCATATCAGTGGACAGTCCAAGAACATTTCCCTGAAGCTGACTCTGTGACCGCTGACAGACGGCCGTATATTCTGCGAGAGTGGGATGATGAGATGGCCACAAGTTATGGGGAGGGCCCTTGAACACTGGGGCCAGGATCCCTGTACCCTCTCCTCAGCCTCCACCAAGGCCCATCGTCTTCCCCTGGCACCTCTCCAAGAGCACCTCTGGGGCACAGCGCCCTGGCTGCTGCTGCAAGGACTACTTCCCGAACCGGTGACGGTGTGCTGGAACCTCAGCGCCCTGACCAGCGCGTGCACACCTTCCCGCTGTCTACAGTCTCAGGA       |
| 107_I_GHV4-61_I_GHJ4 | ACATTTCTTAAATTCAGGTCACAGTCCACATGGAATACTTTCTGAGAGTCTGTGACCTCCTGTGCAAGAACATGAAACACCTGTGGTCTTCTCCTCCTGTTGGCAGTCCCAGATGGTCTGTCCCAGGTGCGAGTCCGGGCCAGGACTGGTGAAGCCTTGGAGACCTGTCCCTCACCTGCTCTGTGTACTCCGTGACCTAGTGTAGTCACTACTGAGCTGGATCCGGCAGCCCCAGGAAAGGGACTGGAGTGGATTGATATATTAACAATGCGAAACAACCACTACAACCCCTCCCTCAGAGTCACTCACCATATCAGTGGAGACAGTCCAAGAACCATTTCCCTGAAGCTGACTCTGTGACCGCTGACAGACGGCCGTATATTCTGCGAGAGTGGGATGATGAGATGGCCACAAGTTATGGGGAGGGCCCTTGAACACTGGGGCCAGGATCCCTGTACCCTCTCCTCAGCCTCCACCAAGGCCCATCGTCTTCCCCTGGCACCTCTCCAAGAGCACCTCTGGGGCACAGCGCCCTGGCTGCTGCTGCAAGGACTACTTCCCGAACCGGTGACGGTGTGCTGGAACCTCAGCGCCCTGACCAGCGCGTGCACACCTTCCCGCTGTCTACAGTCTCAGGA |

|                      |                                                                                                                                                                                                                                                                                                                                                                                                                                                                                                                                                                                                                                                                                  |
|----------------------|----------------------------------------------------------------------------------------------------------------------------------------------------------------------------------------------------------------------------------------------------------------------------------------------------------------------------------------------------------------------------------------------------------------------------------------------------------------------------------------------------------------------------------------------------------------------------------------------------------------------------------------------------------------------------------|
| 107_I_GHV4-61_I_GHJ4 | TTTTCTTAAATTCAGGGTCCAGCTCACATGGAAATACTTTCTGAGAGTCTGGACCTCTGTGCAAGAACATGAAACACCTGTGGTTCTCTCTCTCTGGTGGCAGCTCCAGATGGGTCTGTCCAGGTGCAGCTGCAGAGTGGGGCCAGGACTGGTGAAGCCCTCGGAGACCTGTCCCTCACCTGCAGCTGTCTGTGGTACTCCGTGACAGTGGTAGTCACTACTGGAGCTGGATCCGGCAGCCCCCAGGGAAGGACTGGAGTGGATTGGGTATATGTATTACAGTGGCAACCACTACAACCCCTCCCTCAAGAGTCGACTCACATATCAGGAGACACGTCGAAGAACAGTTCTCCCTGAAACTGAGTTCTGTGACCGCTGCGGACTCGGCCGTTTATTACTGCGCAGAGTAGGGATAGGGTTGGAGATGGCCACAAGTTACGGGGAGGGCCCTTTGACTACTGGGGCCAGGGAACCTGGTCACCGTCTCTCAG                                                                                                                                                                      |
| 107_I_GHV4-61_I_GHJ4 | ACATTTCTTAAATTCAGGGTCCAGCTCACATGGAAATACTTTCTGAGAGTCTGGACCTCTGTGCAAGAACATGAAACACCTGTGGTTCTCTCTCTCTGGTGGCAGCTCCAGATGGGTCTGTCCAGGTGCAGCTGCAGAGTGGGGCCAGGACTGGTGAAGCCCTCGGAGACCTGTCCCTCACCTGCAGCTGTCTGTGGTACTCCGTGACAGTGGTAGTCACTACTGGAGCTGGATCCGGCAGCCCCCAGGGAAGGACTGGAAATGGATTGGGTACATTTATTACAGTGGCAACCACTACAACCCCTCCCTCAAGAGTCGACTCACATATCAGTGGACACGTCCAAGAACATTTCTCCCTGAAGCTGACTCTGTGACCGCTGCGACAGCGCCGTATATTTCTGCGCAGAGTTCGGATAGGGTTGGAGATGGCCACAAGTTACGGGGAGGGCCCTTTGACCACTGGGGCCAGGATCCCTGTCACCGTCTCTCAGCTCCCAAGGGCCATCGGTCTTCCCTGGCACCTCTCCAAGAGCACCTCTGGGGCAGCGGCCCTGGGCTGCTGTGAAGGACTACTTCCCGAACCGGTGACGGTGTCTGTGAAGTCAAGCGCCCTGACCAGCGCGTGCACACCTTCCCGCTGTCTACAGTCTCAAGGA |
| 123_I_GHV3-33_I_GHJ5 | CGAGCCCAGCACTGGGAGTCCGGGTGTTCCATTGCGGTGATCATCACTGAACACAGAGGACTCACCATGGAGTCTGGGCTGAGCTGGGTTTCTCGTTGCTCTTTAAGAGGTGTCAGTGTGAGTGTGAGTGGAGTGGAGTGGGGAGCGGTGTCACCGCTGGGAGTCCCTGAGACTCTCTGTGCAAGCTCTGGATTCAAGTTTCACTCTATGCTCCACTGGGTCCGGCAGGCTCCAGGCAAGGGCTGGAGTGGGTGGCATTGTGTATGATGAACTGAAAAATACTACGCGACTCCGTGAAGGGCCGATTACCATCTCCAGAGACAATTCCAAGAGCACTCTATCTATGAAATGAACAGCCTGAGAGTTGAAGACACGGCTATGATTACTGTGCGAGAGATTGGCCGGCCGACGTTGGTTGATGTACAAGTGTTCGACCCCTGGGGCCAGGGAACCTGTCACCGTCTCTCAGCATCCCGACAGCCCCAAGGTCTTCCCGCTGAGCCTCTGCAACCCAGCCAGATGGGAACGTGTCATCGCCTGCTGTCAGGCTTCTTCCCGCAGGACCACTCAGTGTGACCTGGAGCGAAGCGACAGGGCGTGAACCGCAAGAACTTCCC                                        |
| 123_I_GHV3-33_I_GHJ5 | CGAGCCCAGCACTGGGAGTCCGGGTGTTCCATTGCGGTGATCATCACTGAACACAGAGGACTCACCATGGAGTCTGGGCTGAGCTGGGTTTCTCGTTGCTCTTTAAGAGGTGTCAGTGTGAGTGTGAGTGGAGTGGGGAGCGGTGTCACCGCTGGGAGTCCCTGAGACTCTCTGTGCAAGCTCTGGATTCAAGTTTCACTCTATGCTCCACTGGGTCCGGCAGGCTCCAGGCAAGGGCTGGAGTGGGTGGCATTGTGTATGATGAACTGAAAAATACTACGCGACTCCGTGAAGGGCCGATTACCATCTCCAGAGACAATTCCAAGAGCACTCTATCTATGAAATGAACAGCCTGAGAGTTGAAGACACGGCTATGATTACTGTGCGAGAGATTGGCCGGCCGACGTTGGTTGATGTACAAGTGTTCGACCCCTGGGGCCAGGGAACCTGTCACCGTCTCTCAGCATCCCGACAGCCCCAAGTCTTCCCGCTGAGCCTCTGCAACCCAGCCAGATGGGAACGTGTCATCGCCTGCTGTCAGGCTTCTTCCCGCAGGACCACTCAGTGTGACCTGGAGCGAAGCGACAGGGCGTGAACCGCAAGAACTTCCC                                              |
| 126_I_GHV3-30_I_GHJ4 | GCTCTGGGAGAGGAGCCAGCACTAGAAGTCCGGGTGTTCCATTGCGGTGATCCGCACTGAACACAGAGGACTCACCATGGAGTTGGGCTGAGCTGGGTTTCTCGTCTCTTTAAGAGGTGTCAGTGTGAGTGTGAGTCTGGGGAGCGGTGTCACCGCTGGGAGTCCCTGAGACTCTCTGTGCAAGCTCTCGATTCACTTCACTCTATGCTCCACTGGGTCCGGCAGGCTCCAGGCAAGGGCTGGAGTGGGTGGCATTGTGTATGATGAACTGAAAAATACTATGAGACTCCGTGAAGGGCCGATTCAACATCTCCAGAGACAATTCCAGGAACAGCCTGATTTGCAACTGACAGTCTGAGAGTGGAGGACACGGCTGTTTATTACTGTGCGAAGAGGGCCCTCCACATTAATGTTCCGGGACTACTGATTGGGGCCAGGGAACCTGGTCACCGTCTCTCAGCATCCCGACAGCCCCAAGCAACCTTTTCCCGTCTCTGTGAGAATTTCCCGTCGGATACGAGCAGCGT                                                                                                                                  |
| 126_I_GHV3-30_I_GHJ4 | GAGCTCTGGGAGAGGAGCCAGCACTAGAAGTCCGGGTGTTCCATTGCGGTGATCCGCACTGAACACAGAGGACTCACCATGGAGTTGGGCTGAGCTGGGTTTCTCGTCTCTTTAAGAGGTGTCAGTGTGAGTGTGAGTGTGAGTCTGGGGAGCGGTGGTCCAGCCTGGGAAGTCCCTGAGACTCTCTGTGCAAGCTCTCGATTCACTTCACTAGCTATGCCATGCACTGGGTCGGCCAGGTTCCAGGCAAGGGCTGGAGTGGGTGGCAATTTTCACTAATGAACTAAAAATACTATGAACTCCGTGAAGGGCCGATTCAACATCTCCAGAGACAATTCCAGGAACAGCCTGATTTGCAATTGAACAGCCTGAGAGTTGAGGACACGGCTGTTTATTACTGTGCGAAGAGGGCCCTCCAACTAATGTTCCGGGACTACTGATTGGGGCCAGGGAACCTGGTCACCGTCTCTCCGCTCCACCAAGGGCCCATCGGTCTTCCCGTGGCACCTCTCCAAGAGCACCTCTGGGGCAGAGCGCCCTGGGCTGCTGTGAAGGACTACTTCCCGAACCGGTGACGGTGTGTTGAACTCAGGCGCCCTGACCAGCGCGTGCACACCTTCCCGCTGTCTACAGTCTCAGGA                |
| 126_I_GHV3-30_I_GHJ4 | GAGCTCTGGGAGAGGAGCCAGCACTAGAAGTCCGGGTGTTCCATTGCGGGATCAGCTGAACACAGAGGACTCACCATGGACTTTGGGCTGAGCTGGGTTTCTCGTTGCTCTTTAAGAGGTGTCAGTGTGAGTGTGAGTGTGAGTCTGGGGAGCGGTGGTCCAGCCTGGGAAGTCCCTGAGACTCTCTGTGCAAGCTCTCGATTCACTTCACTAATATGCCATGCACTGGGTCGGCCAGGTTCCAGGCAAGGGCTGGAGTGGGTGGCAATTTTCACTAATGAACTAAAAATACTATGAACTCCGTGAAGGGCCGATTCAACATCTCCAGAGACAATTCCAGGAACAGCCTTATCTGCAATTGAACAGCCTGAGAGTTGAGGACACGGCTGTTTATTACTGTGCGAAGAGGGCCCTCCAACTAATGTTCCGGGACTACTGATTGGGGCCCGGGAACCTGGTCACCGTCTCTCAGCCTCCACCAAGGGCCATCGGTCTTCCCGTGGCACCTCTCCAAGAGCACCTCTGGGGCAGAGCGCCCTGGGCTGCTGTGAAGGACTACTTCCCGAACCGGTGACGGTGTGTTGAACTCAGGCGCCCTGACCAGCGCGTGCACACCTTCCCGCTGTCTACAGTCTCAGGA                 |
| 126_I_GHV3-30_I_GHJ4 | GGGAGAGGAGCCAGCACTAGAAGTCCGGGTGTTCCATTGCGGGATCAGCTGAACACAGAGGACTCACCATGGAGTTGGGCTGAGCTGGGTTTCTCGTTGCTCTTTAAGAGGTGTCAGTGTGAGTGTGAGTGTGAGTCTGGGGAGCGGTGGTCCAGCCTGGGAAGTCCCTGAGACTCTCTGTGCAAGCTCTCGATTCACTTCACTAGCTATGCCATGCACTGGGTCGGCCAGGTTCCAGGCAAGGGCTGGAGTGGGTGGCAATTTTCACAAAATGAACTAAAAATACTATGAACTCCGTGAAGGGCCGATTCAACATCTCCAAGACAATTCCAGGAACAGCCTTATCTGCAATTGAACAGCCTGAGAGTTGAGGACACGGCTGTTTATTACTGTGCGAAGAGGGCCCTCCAACTAATGTTCCGGGACTACTGATTGGGGCCCGGGAACCTGGTCACCGTCTCTCAGCCTCCACCAAGGGCCATCGGTCTTCCCGTGGCACCTCTCCAAGAGCACCTCTGGGGCAGAGCGCCCTGGGCTGCTGTGAAGGACTACTTCCCGAACCGGTGACGGTGTGTTGAACTCAGGCGCCCTGACCAGCGCGTGCACACCTTCCCGCTGTCTACAGTCTCAGGA                        |
| 217_I_GHV1-2_I_GHJ6  | GAGAGCATCACCCAGCAACACATCTGCTCTAGAGAATCCCTGAGAGTCCGTTCTCACCATGGACTGGACCTGGAGATCCTCTTCTGGTGGCAGCAGCCAGAGTCCACTCCCAGGTGCAGCTGTGAGTGTGGGCTGAGTGAAGAACCTGGGCTCAGTGAAGGTCTCTGCAAGGCTTGTGATACACCTCACCGCTACTATACACTGGTGCAGACAGCCCCCTGGACAGGGCTTGGAGTGGTGGATCAACCTAACAGAGTGGCACAACTATGAGAGCAGTTTTCAGGGCAGGGTCCATGACCAGCGACAGTCCATCACCAAGCCTACATGGAGCTGAGCAGGCTGACTTCTGACGACACGGCCGTATTACTGTGCGAAGAGCGGTTCCGGGACTTTTATCTCGGCCATGGACGCTGTGGGGCCAAGGACCAGTCCCGTCTCTCAGGGAGTCACTCCGCCCAACCTTTTCCCGTCTCTGTGAGAATTTCCCGTCGGATACGAGCAGCGT                                                                                                                                                        |
| 217_I_GHV1-2_I_GHJ6  | GGGAGCATCACCCAGCAACACATCTGCTCTAGAGAATCCCTGAGAGTCCGTTCTCACCATGGACTGGACCTGGAGATCCTCTTCTGGTGGCAGCAGCCAGAGTCCACTCCCAGGTGCAGCTGTGAGTGTGGGCTGAGTGAAGAACCTGGGCTCAGTGAAGGTCTCTGCAAGGCTTGTGATACACCTCACCGCTACTATACACTGGTGCAGACAGCCCCCTGGACAGGGCTTGGAGTGGTGGATCAACCTAACAGAGTGGCACAACTATGAGAGCAGTTTTCAGGGCAGGGTCCATGACCAGCGACAGTCCATCACCAAGCCTACATGGAACTGAGCAGGCTGAGTTCTGACGACACGGCCGTATTACTGTGCGAAGAGCGGTTCCGGGAAATTTTGTCTCGGCCATGGACGCTGTGGGGCCAAGGACCAGTCCCGTCTCTCAGGGAGTCACTCCGCCCAACCTTTTCCCGTCTCTGTGAGAATTTCCCGTCGGATACGAGCAGCGT                                                                                                                                                       |

|                      |                                                                                                                                                                                                                                                                                                                                                                                                                                                                                                                                                                                                                                                                                 |
|----------------------|---------------------------------------------------------------------------------------------------------------------------------------------------------------------------------------------------------------------------------------------------------------------------------------------------------------------------------------------------------------------------------------------------------------------------------------------------------------------------------------------------------------------------------------------------------------------------------------------------------------------------------------------------------------------------------|
| 217_I_GHV1-2_I_GHJ6  | GAGAGCATCACCCAGCGACCACATCTGTCTCTAGAGAATCCCCTGAGAGCTCCGTTCTCACCATTGGACTGGACCTGGAGGATCCTCTTGGTGGCAGCAGCCACAGGAGCCCCTCCAGGTGAGCTGGTGCAGTCTGGGGCTGAGGTGAAGAAGCCTGGGGCCTCA<br>GTGAAGGTCTCCTGCAAGGCTCTGGATACACCTTCACCGCTATTATATGCACTGGTGGCAGACGCCCCGGGACAGGCGTTGAGTGGATGGATGATCAACCCTAACAGAGGTGGCAGAGATTATGACAGAAAGTTTCGGGGCAGGTCACCATGACCAGGGACACAT<br>CCATCAGCAGCTACTATGACTGAGCAGCCTGAGATCTGACGACACGCGCTATATTACTGTGCGAGAAGCGGTTTCGGGGATTCTTATCTCGGGCCATGAGCCTGTGGGCCAAGGACCACGCTCACCGTCTCCTCAGCCTCCACCAAGGGCCCCATCGGTCTCCCC<br>TGGCACCCCTCTCAAGAGCACCTGTGGGGGCACAGCGCCCTGGCTGCTGCTCAAGGACTACTCCCCAACCGGTGACGGTGTGCTGGAACCTCAGCGCCCTGACCACGCGGTGCACACCTTCCGGCTGTCTACAGTCTCAGGA       |
| 217_I_GHV1-2_I_GHJ6  | GAGAGCATCACCCAGCAACCACATCTGTCTCTGAGAATCCCCTGAGAGCTCCGTTCTCACCATTGGACTGGACCTGGAGGATCCTCTTCTTGGCGGAGCAGCCACAGAGTCCACTCCCAGGTGAGCTGGTGCAGTCTGGGGCTGAGGTGAAGAAGCCTGGGGACTCAG<br>TGAAGGTCTCCTGCAAGGCTCTGGATACACCTTCACCGCTACTATATACACTGGTGGCAGACGCCCCGGGACAGGCGTTGAGTGGATGGATGATCAACCCTAACAGAGGTGGCACAACCTATGGAGAGAAGTTTCAGGGCAGGTCGCCATGACCAGGGACACGTC<br>CATCAGCACAGCTACATGAGCTGAGCAGGCTGAGTTCTGACGACACGCGCTGATTACTGTGCGAGAAGCGGTTTCGGGGATTCTTATCTCGGGCCATGAGCCTGTGGGCCAAGGACCACGCTCACCGTCTCCTCAGGGAGTGCATCGCCCCAACCTTTTCCCC<br>CTCGTCTCCTGTGAGAATCCCCCTCGGATACGAGCAGCGTG                                                                                                           |
| 217_I_GHV1-2_I_GHJ6  | GGGAGCATCACCCAGCAACCACATCTGTCTCTAGAGAATCCCCTGAGAGCTCCGTTCTCACCATTGGACTGGACCTGGAGGATCCTCTTCTTGGTGGCAGCAGCCACAGAGTCCACTCCCAGGTGAGCTGGTGCAGTCTGGGGCTGAGGTGAAGAAGCCTGGGGCCTCA<br>GTGAAGGTCTCCTGCAAGGCTCTGGATACACCTTCACCGCTACTATATACACTGGTGGCAGACGCCCCGGGACAGGCGTTGAGTGGATGGATGATCAACCCTAACAGAGGTGGCACAACCTATGGAGAGAAGTTTCAGGGCAGGTCGCCATGACCAGGGACACG<br>TCCATCAGCACAGCTACATGAACTGAGCAGGCTGAGTTCTGACGACACGCGCTGATTACTGTGCGAGAAGCGGTTTCGGGGAAATTTTGTCTCGGGCCATGAGCCTGTGGGCCAAGGACCACGCTCACCGTCTCCTCAGCTCCACCAAGGGCCCCATCGGTCTCCC<br>CCTGGCGCCCTGTCCAGGAGCACCTGTGGGGGCACAGCGCCCTGGCTGCTGCTCAAGGACTACTCCCCAACCGGTGACGGTGTGCTGGAACCTCAGCGCCCTGACCAGCGCGTGCACACCTTCCGGCTGTCTACAGTCTCAGGA |
| 125_I_GHV4-3_I_GHJ4  | GTGCTTCTGAGAGTCTGACCTCCTGCACAAGAACATGAACACCTGTGGTTCTCTCCTCCTGTTGGCAGCTCCAGATGGTCTGTCCAGGTGAGCTACAGCAATGGGGCGCAGACTTTTGAAGCCCTGGAGACCTGTCCCTCACCTGCGTGTCTGTGGTG<br>GTCCCTCAGTGATTACTTCTGGAAGTGGATCCGCAAGTCCCGAGGGAAGGGCTGGAGTGGATTGGCAGATCAATCTTAGTGGAAACCACCACTACAACCCGTCCTCAAGAGTGCAGTCCCGTATCAATAGACACGTCACAAACCCAGTTCTCCCTAAAAGTACCTCTGTA<br>CCGCCGCGACACGGCTGTGATTACTGTGCGAGAGCGCGTTTCGGGGAGCCTATGTTGGAGTTCCCTTGGTTTTTGCAGTACTGGGCCAGGAAACCTGTGTAACCTGTCTCAGCATCCCCACCAGCCCCAAGGCTTCCCGCTGAGCCTCTGAGCACCCAGCCA<br>GATGGGAACGTGGTATCGCTGCTGCTCCAGGCTTCTCCCCAGGAGCACTCAGTGTGACTGGAGCGAAAGCGGACAGGGCGTACCGCCAGAACTTCCC                                                         |
| 125_I_GHV4-34_I_GHJ4 | AGTGCTTCTGAGAGTCTGACCTCCTGCACAAGAACATGAACACCTGTGGTTCTCTCCTCCTGTTGGCAGCTCCAGATGGTCTGTCCAGGTGAGCTACAGCAGTGGGGCGCAGACTATTGAAGCCTTGGAGACCTGTCCCTGACCTGCGTGTCTGTGGT<br>GGGTGGTTCAGTGATTACTTCTGGAAGTGGATCCGCAAGTCCCGAGGGAAGGGCTGGAGTGGATTGGAAATCAATTTTGTGGATCCACCACTACAACCCGTCCTCAAGAGTGCAGTCCCATTTAGTAGACAGTCCAAGAACCAAGTTCTCCCTGAAGTAACTCTG<br>TGACCGCCGCGACACGGCTGTCTTACTGTGCGAGAGCGCGGTTTCGGGGAGCCTATCGTGGAGTCCCTTGGTTTTTGCAGTACTGGGCCAGGAAACCTGTGTAACCTGTCTCAGCTCCACCAAGGGCCCCATCGTCTCCCCCTGGCACCCCTCTCAAGAGC<br>ACCTCTGGGGGCACAGCGCCCTGGGCTGCTGCTCAAGGACTACTCCCCAACCGGTGACGGTGTGCTGGAACCTCAGCGCCCTGACCAGCGCGTGCACACCTTCCGGCTGTCTACAGTCTCAGGA                                    |
| 125_I_GHV4-34_I_GHJ4 | GGGTCCAGCTCATGGAAGTCTTCTGAGAGTCTGACCTCCTGCACAAGAACATGAACACCTGTGGTTCTCTCCTCCTGTTGGCAGCTCCAGATGGTCTGTCCAGGTGAGCTACAGCAGTGGGGCGCAGACTTTTGAAGCCCTCGGAGACCTGTCCCTCACCTGCGTGTCTGTGGT<br>ACCTGCGGTGTCTGTGGTGGTCTTTAGTATTACTTCTGTACTGATTCCGCAAGTCCCGAGGGAAGGGCTGGAAATGGAATGGCCAGATCAATTTTGGTGAAGTACGAACTACAACCCGTCCTCCAGAGTGCAGTCCATTTAGTAGACAGTCCAAGAACCAAGTT<br>TCCCTGAGGCTGACCTCTGTACCAGCGGACACGGCAGTCTATTACTGTGCGAGAGCGCGGTTTCGGGGAGCCTATGTTGGAGTCCCTTGGTTTTTGCAGTACTGGGCCAGGAAACCTGTGTAACCTGTCTCAGCTCCACCAAGGGCCCCATCGTCTCCCCCT<br>GGCACCCCTCTCAAGAGCACCTGTGGGGGCACAGCGCCCTGGGCTGCTGCTCAAGGACTACTCCCCAACCGGTGACGGTGTGCTGGAACCTCAGCGCCCTGACCAGCGCGTGCACACCTTCCGGCTGTCTACAGTCTCAGGA  |
| 125_I_GHV4-34_I_GHJ4 | AGTGCTTCTGAGAGTCTGACCTCCTGCACAAGAACATGAACACCTGTGGTTCTCTCCTCCTGTTGGCAGCTCCAGATGGTCTGTCCAGGTGAGCTACAGCAATGGGGCGCAGACTTTTGAAGCCCTGGAGACCTGTCCCTCACCTGCGTGTCTGTGGT<br>GGTCCCCAGTATTACTTCTGGAAGTGGATCCGCAAGTCCCGAGGGAAGGGCTGGAGTGGATTGGCAGATCAATCTTGGTGGATCCACCACTACAACCCGTCCTCAAGAGTGCAGTCCCATTTAGTAGACAGTCCAAGAACCAAGTTCTCCCTGAAGTAACTCTGT<br>GACCGCCGCGACACGGCTGTTTACTGTGCGAGAGCGCGGTTTCGGGGAGCCTATGTTGGAGTCCCTTGGTTTTTGCAGTACTGGGCCAGGAAACCTGTGTAACCTGTCTCAGCTCCACCAAGGGCCCCATCGTCTCCCCCTGGCACCCCTCTCAAGAGCA<br>CCTCTGGGGGCACAGCGCCCTGGGCTGCTGCTCAAGGACTACTCCCCAACCGGTGACGGTGTGCTGGAACCTCAGCGCCCTGACCAGCGCGTGCACACCTTCCGGCTGTCTACAGTCTCAGGA                                      |
| 125_I_GHV4-34_I_GHJ4 | AGTGCTTCTGAGAGTCTGACCTCCTGCACAAGAACATGAACACCTGTGGTTCTCTCCTCCTGTTGGCAGCTCCAGATGGTCTGTCCAGGTGAGCTACAGCAGTGGGGCGCAGACTATTGAAGCCTTGGAGACCTGTCCCTCACCTGCGTGTCTGTGGT<br>GGTCTTTCAGGATTACTTCTGGAAGTGGATCCGCAAGTCCCGAGGGAAGGGCTGGAGTGGATTGGCAGATCAATCTTGGTGGATCCACCACTACAACCCGTCCTCAAGAGTGCAGTCCCATTTAGTAGACAGTCCAAGAACCAATTTCTCCCTGAAGTAACTCTGT<br>TGACCGCCGCGACACGGCTGTATTCTGTGCGAGAGCGCGGTTTCGGGGAGCCTATGTTGGAGTCCCTTGGTTTTTGCAGTACTGGGCCAGGAAACCTGTGTAACCTGTCTCAGCTCCACCAAGGGCCCCATCGTCTCCCCCTGGCACCCCTCTCAAGAGCA<br>CCTCTGGGGGCACAGCGCCCTGGGCTGCTGCTCAAGGACTACTCCCCAACCGGTGACGGTGTGCTGGAACCTCAGCGCCCTGACCAGCGCGTGCACACCTTCCGGCTGTCTACAGTCTCAGGA                                    |
| 125_I_GHV4-34_I_GHJ4 | TTTCTTATATGGGAGTCTTCTGAGAGTCTGACCTCCTGCACAAGAACATGAACACCTGTGGTTCTCTCCTCCTGTTGGCAGCTCCAGATGGTCTGTCCAGGTGAGCTACAGCAGTGGGGCGCAGACTTTTGAAGCCCTCGGAGACCTGTCCCTCACCT<br>CGGTGTCTGTGGTGGTCCCTCAGTATTACTTCTGGAAGTGGATCCGCAAGTCCCGAGGGAAGGGCTGGAGTGGATTGGCAGATCAATCTTGGTGGAGCCACCACTACAACCCGTCCTCAAGAGTGCAGTCCCGTATCAATAGACAGTCCAAGAACCAAGTTGCCC<br>TGAAGCTGACCTCTGTACCAGCGGACACGGCTGTGATTCTGTGCGAGAGCGCGGTTTCGGGGAGCCTATGTTGGAGTCCCTTGGTTTTTGCAGTACTGGGCCAGGAAACCTGTGTAACCTGTCTCAGCTCCACCAAGGGCCCCATCGTCTCCCCCTGGCACCCCTCTCAAGAGCA<br>ACCCTCTCAAGAGCACCTGTGGGGGCACAGCGCCCTGGGCTGCTGCTCAAGGACTACTCCCCAACCGGTGACGGTGTGCTGGAACCTCAGCGCCCTGACCAGCGCGTGCACACCTTCCGGCTGTCTACAGTCTCAGGA        |
| 156_I_GHV1-46_I_GHJ4 | GGCCCTGAAAGCATCTCAACAACCAACCTCTCTACAGAAGCCTCTGAGAGGAAGTTCTCACCATTGGACTGGACCTGGAGGTTCTTCTGTTGCTGGTGTAGCTCCAGTGTCTCACTCCCAGGTGAGTGGTGGTGCAGTCTGGGGCTGAGGTGAGGAAGCCTGGG<br>GCCTCAGTGAAGGTTTCTGCAAGCATCTGATACAGCTTACCAGCTTCTATATCTACTGGTGGAAAGCCCCCTGGACAAGGCTTGTAGTGGATGGAGTAACTGACCTAGTGGTGTAGTACCAGTACGACAGAGGTTCCAGGGCAGAGTACCATGACCCGGG<br>ACACTCCAGAGCGAGTCTACATGGAGCTGAGCAGCTGAGATTTGAGGACACGCGCGTATTACTGTGCGGAATCGTGGGAGTACTAGTACTACTGGGCCAGGAAACCTGTGTAACCTGTCTCAGCTCCACCAAGGGCCCCATCGTCTCCCCCTGGCACCC<br>TCTCCAGAGCACCTGTGGGGGCACAGCGCCCTGGGCTGCTGCTCAAGGACTACTCCCCAACCGGTGACGGTGTGCTGGAACCTCAGCGCCCTGACCAGCGCGTGCACACCTTCCGGCTGTCTACAGTCTCAGGA                           |

|                      |                                                                                                                                                                                                                                                                                                                                                                                                                                                                                                                                                                                                                                                                          |
|----------------------|--------------------------------------------------------------------------------------------------------------------------------------------------------------------------------------------------------------------------------------------------------------------------------------------------------------------------------------------------------------------------------------------------------------------------------------------------------------------------------------------------------------------------------------------------------------------------------------------------------------------------------------------------------------------------|
| 156_I_GHV1-46_I_GHJ4 | CCCTGAAAGCATCATCCAACAACCACATCCCTTCTTACAGAAGCCTCTGAGAGAAAGTTCTTACCATGACTGGACCTGGAGGGTCTTCTGCTTCTGCTGTAGTCCAGTGGTCACTCCCAGGTGCAACTGGTGCAGTCTGGGGCTGAGGTGAGGAAGCCTGGGGCTTCAGTGAAGGTTTCTGCAAGGCATCTGGATAGGTTTACCAGTTTCTATATTCACTGGGTGCGAAAGGCCCCAGGACAAAGGCTTGAATGGATGGGGTTAATCGACCTAGTGGTGGTACCGCATTGACGACAGAAATCCAGGACAGTACCATGACCGGGACA<br>CGTCCACGAGCGAAGTCTACTTGGAGTTGAGCAGCCTGAGATCTGAAGACACGCCATGTATTACTGTGGAGAATCGTGGAGGACTAGTACTACTGGGGCCAGGAAACCTGTGTCCAGTCTCTCAGCCTCCACCAAGGGCCCATCGTCTTCCCCTGGCACCTCTCC<br>TCCAAGAGCACCTCTGGGGCACAGCGCCCTGGCTGCTGCTGCTCAAGGACTACTCCCCAACCGGTGACGGTGTCTGTGAACCTCAGGCGCCCTGACCAGCGCGTGCACACTTCCCCTGCTCTACAGTCTCAGGA                |
| 156_I_GHV1-46_I_GHJ4 | GAAAGCATCATCCAACAACCACATCCCTTCTTACAGAAGCCTCTGAGAGAAAGTTCTTACCATGACTGGACCTGGAGGGTCTTCTGCTTCTGCTGTAGTCCAGTGGTGCAGTCCAGGTGCACTGGTGCAGTCTGGGGCTGAGGTGAGGAAGCCTGGGGCTCCCTCA<br>GTGAAAATTTCTGCAAGGCATCTGGATACAGTTTACCAGTTTCTATATTCACTGGGTGCGAAAGGCCCTGGACAAGGGCTTGAATGGATGGGGTTAATCGACCTAGTGGTGGTACCGCATTGACGACAGAGTTCCAGGACAGACTCACATGACCAAGTCCACGTTCC<br>ACGAGCGAAGTCTACATGATGATCTGAGAAGGCTGACATTTAGGACACGGCCATATATTACTGTGGAGAATCGTGGAGGCACTAGTACTACTGGGGCCAGGAAACCTGATCACCGTCTCTCAGCCTCCACCAAGGGCCCATCGTCTTCCCCTGGCACCTCTCCAAG<br>AGCACCTCTGGGGCACAGCGCCCTGGCTGCTGCTCAAGGACTACTCCCCAACCGGTGACGGTGTCTGTGAACCTCAGGCGCCCTGACCAGCGCGTGCACACTTCCCCTGCTCTACAGTCTCAGGA             |
| 156_I_GHV1-46_I_GHJ4 | AAAGCATCATCCAACAACCACATCCCTTCTTACAGAAGCCTCTGAGAGAAAGTTCTTACCATGACTGGACCTGGAGGGTCTTCTGCTTCTGCTGTAGTCCAGTGGTGCAGTCCAGGTGCACTGGTGCAGTCTGGGGCTGAGGTGAGGAAGCCTGGGGCTCAGT<br>GAAGGTTTCTGCAAGGCATCTGGATACAGTTTACCAGTTTCTATATTCACTGGGTGCGAAAGGCCCTGGACAAGGGCTTGAATGGATGGGGTTAATCGACCTAGTGGTGGTACCGCATTGACGACAGAGTTCCAGAACAGAGTCCCATGACCAAGTCCACGTTCC<br>GAGAAAAGTCTACATGAGTTGAGTCCAGTCTGAGAGACACGGCCGTATATTGTTGGAGAATCGTGGAGGACTAGTACTACTGGGGCCAGGAAACCTGTGTCCAGTCTCTCAGCCTCCACCAAGGGCCCATCGTCTTCCCCTGGCACCTCTCCAAGA<br>GCACCTCTGGGGCACAGCGCCCTGGCTGCTGCTCAAGGACTACTCCCCAACCGGTGACGGTGTCTGTGAACCTCAGGCGCCCTGACCAGCGCGTGCACACTTCCCCTGCTCTACAGTCTCAGGA                             |
| 156_I_GHV1-46_I_GHJ4 | ATCATCCAACAACCACATCCCTTCTTACAGAAGCCTCTCAGAGAAAGTTCTTACCATGACTGGACCTGGAGGGTCTTCTGCTTCTGCTGCTGTAGTCCAGTGGTGCAGTCCAGGTGCACTGGTGCAGTCTGGGGCTGAGGTGAGGAAGCCTGGGGCTCAGTGAAG<br>TTTCTGCAAGGCATCTGGATAGGTTTACCAGTTTCTATATTCACTGGGTGCGAAAGGCCCCAGGACAAGGGCTTGAATGGATGGGGTTAATCGACCTAGTGGTGGTACCGCATTGACGACAGAGTTCCAGAACAGAGTCCCATGACCAAGTCCACGTTCC<br>GAAGTCTACATGAGTTGAGCAGCCTGAGATCTGAGGACACGGCCATGTATTACTGTGGAGAATCGTGGAGGACTAGTACTACTGGGGCCAGGAAACCTGTGTCCAGTCTCTCAGCCTCCACCAAGGGCCCATCGTCTTCCCCTGGCACCTCTCCAAGAGCAC<br>CTCTGGGGCACAGCGCCCTGGCTGCTGCTCAAGGACTACTCCCCAACCGGTGACGGTGTCTGTGAACCTCAGGCGCCCTGACCAGCGCGTGCACACTTCCCCTGCTCTACAGTCTCAGGA                              |
| 67_I_GHV1-69D_I_GHJ3 | AGCACATAACAACCACATCTCCTCTTAAAGAACCCCTGGGAGCAGAGCTCATCACCATGACTGGACCTGGAGGTTCTCTTTGGTGGGAGCAGTACAGGTGTCAGTCCCAGGTGCGAGTGTGCAGTCTGGGGCTGAGGTGAAGAACCTGGGCTCGTGAA<br>GTCTCTGCAAGGCCTCTGGTGGCTCCTCAGCAGCTTGGCTTCTCAGTGGTGGCGACAGGCCCTGGACAAGGACTTGAATGATGGGGTTAATCGACCTAGTGGTGGTACCGCATTGTCGGAAACCGCAGACTACGACAGAAAGTTCCAGAACAGACTCAGATTGTCGGGACGAA<br>CACAGTCCCATGGAAGTGAAGGCTGACATCTGAAGACACGGCCGTATTTCTGCGGAGACGAAAGGCTGTGATAGTGGTCCCCCCCCGGCGAGGCTTTTGATATCTGGGGCCAAGGACAATGATCACCGTCTCTCAGCCTCCACCAAGGGCCCATCGTCTTCC<br>CCCTGGCACCTCTCCAAGAGCACCTCTGGGGCACAGCGCCCTGGCTGCTGCTCAAGGACTACTCCCCAACCGGTGACGGTGTCTGTGAACCTCAGGCGCCCTGACCAGCGCGTGCACACTTCCCCTGCTCTACAGTCTCAGGA |
| 67_I_GHV1-69D_I_GHJ3 | AGCACATAACAACCACATCTCCTCTTAAAGAACCCCTGGGAGCAGAGCTCATCACCATGACTGGACCTGGAGGTTCTCTTTGGTGGGAGCAGTACAGGTGTCAGTCCCAGGTGCGAGTGTGCAGTCTGGGGCTGAGGTGAAGAACCTGGGCTCGTGAA<br>GTCTCTGCAAGGCCTCTGGTGGCTCCTCAGCAGCTTGGCTTCTCAGTGGTGGCGACAGGCCCTGGACAAGGACTTGAATGATGGGGAAATCATCCCTTTGTCAGGAAACCGTACTACGACAGAAAGTTCCAGAACAGACTCAGATTGTCGGGACGAAAGTACAGC<br>CACAGTCCCATGGAAGTGAAGGCTGACATCTGAAGACACGGCCGTATTTCTGCGGAGACGAAAGGCTGTGATAGTGGTCCCCCCCCGGCGAGGCTTTTGATATCTGGGGCCAAGGACAATGATCACCGTCTCTCAGCCTCCACCAAGGGCCCATCGTCTTCC<br>CCCTGGCACCTCTCCAAGAGCACCTCTGGGGCACAGCGCCCTGGCTGCTGCTCAAGGACTACTCCCCAACCGGTGACGGTGTCTGTGAACCTCAGGCGCCCTGACCAGCGCGTGCACACTTCCCCTGCTCTACAGTCTCAGGA         |
| 67_I_GHV1-69D_I_GHJ3 | AGCACATAACAACCACATCTCCTCTTAAAGAACCCCTGGGAGCAGAGCTCATCACCATGACTGGACCTGGAGGTTCTCTTTGGTGGGAGCAGTACAGGTGTCAGTCCCAGGTGCGAGTGTGCAGTCTGGGGCTGAGGTGAAGAACCTGGGCTCGTGAA<br>GTTTCTGCAAGGCTTCTGAGGCGCCTTCAAGGCTTGGCTTCTCAGTGGTGGCGACAGGCCCTGGACAAGGACTTGAATGATGGGGAAATCATCCCTATTTGGAGCAGCAGACTACGACAGAAAGTTCCAGAACAGACTCAGATTGTCGGGACGAAAGTACAGC<br>GACAGTCCCATGGAAGTGAAGGCTGACATCTGAAGACACGGCCGTATTTCTGCGGAGACGAAAGGCTGTGATAGTGGTCCCCCCCCGGCGAGGCTTTTGATATCTGGGGCCAAGGACAATGATCACCGTCTCTCAGCCTCCACCAAGGGCCCATCGTCTTCC<br>CCCTGGCACCTCTCCAAGAGCACCTCTGGGGCACAGCGCCCTGGCTGCTGCTCAAGGACTACTCCCCAACCGGTGACGGTGTCTGTGAACCTCAGGCGCCCTGACCAGCGCGTGCACACTTCCCCTGCTCTACAGTCTCAGGA           |
| 67_I_GHV1-69D_I_GHJ3 | AGCACATAACAACCACATCTCCTCTTAAAGAACCCCTGGGAGCAGAGCTCATCACCATGACTGGACCTGGAGGTTCTCTTTGGTGGGAGCAGTACAGGTGTCAGTCCCAGGTGCGAGTGTGCAGTCTGGGGCTGAGGTGAAGAACCTGGGCTCGTGAA<br>GTCTCTGCAAGGCTTCTGAGGCGCCTTCAAGGCTTGGCTTCTCAGTGGTGGCGACAGGCCCTGGACAAGGACTTGAATGATGGGGAAATCATCCCTATTTGGAGCAGCAGACTACGACAGAAAGTTCCAGAACAGACTCAGATTGTCGGGACGAAAGTACAGC<br>GTACAATATACATGGAATGAGAGGCTGACATCTGAAGACACGGCCGTATTTCTGCGGAGACGAAAGGCTGTGATAGTGGTCCCCCCCCGGCGAGGCTTTTGATATTTGGGGCCAAGGACAATGATCACCGTCTCTCAGCCTCCACCAAGGGCCCATCGTCTTCC<br>CCCTGGCACCTCTCCAAGAGCACCTCTGGGGCACAGCGCCCTGGCTGCTGCTCAAGGACTACTCCCCAACCGGTGACGGTGTCTGTGAACCTCAGGCGCCCTGACCAGCGCGTGCACACTTCCCCTGCTCTACAGTCTCAGGA         |
| 67_I_GHV1-69D_I_GHJ3 | AGCACATAACAACCACATCTCCTCTTAAAGAACCCCTGGGAGCAGAGCTCATCACCATGACTGGACCTGGAGGTTCTCTTTGGTGGGAGCAGTACAGGTGTCAGTCCCAGGTGCGAGTGTGCAGTCTGGGGCTGAGGTGAAGAACCTGGGCTCGTGAA<br>GTCTCTGTAAGGCTTCTGAGGCGCCTTCAAGGCTTGGCTTCTCAGTGGTGGCGACAGGCCCTGGACAAGGACTTGAATGATGGGGAAATCATCCCTAGTTTGGGAGCAGCAGACTACGACAGAAAGTTCCAGAACAGACTCAGATTGTCGGGACGAAAGTACG<br>AGCACGTTTATATGACTGAGAGGCTGACATCTGAAGACACGGCCGTATTTCTGCGGAGACGAAAGGCTGTGATAGTGGTCCCCCCCCGGCGAGGCTTTTGATATTTGGGGCCAAGGACAATGATCACCGTCTCTCAGCCTCCACCAAGGGCCCATCGTCTTCC<br>CCCCCTGGCACCTCTCCAAGAGCACCTCTGGGGCACAGCGCCCTGGCTGCTGCTCAAGGACTACTCCCCAACCGGTGACGGTGTCTGTGAACCTCAGGCGCCCTGACCAGCGCGTGCACACTTCCCCTGCTCTACAGTCTCAGGA        |
| 67_I_GHV1-69D_I_GHJ3 | AGCACATAACAACCACATCTCCTCTTAAAGAACCCCTGGGAGCAGAGCTCATCACCATGACTGGACCTGGAGGTTCTCTTTGGTGGGAGCAGTACAGGTGTCAGTCCCAGGTGCGAGTGTGCAGTCTGGGGCTGAGGTGAAGAACCTGGGCTCGTGAA<br>GTCTCTGTAAGGCTTCTGAGGCGCCTTCAAGGCTTGGCTTCTCAGTGGTGGCGACAGGCCCTGGACAAGGACTTGAATGATGGGGAAATCATCCCTAGTTTGGGAGCAGCAGACTACGACAGAAAGTTCCAGAACAGACTCAGATTGTCGGGACGAAAGTACG<br>AGCACGTTTATATGACTGAGAGGCTGACATCTGAAGACACGGCCGTATTTCTGCGGAGACGAAAGGCTGTGATAGTGGTCCCCCCCCGGCGAGGCTTTTGATATTTGGGGCCAAGGACAATGATCACCGTCTCTCAGCCTCCACCAAGGGCCCATCGTCTTCC<br>CCCCCTGGCACCTCTCCAAGAGCACCTCTGGGGCACAGCGCCCTGGCTGCTGCTCAAGGACTACTCCCCAACCGGTGACGGTGTCTGTGAACCTCAGGCGCCCTGACCAGCGCGTGCACACTTCCCCTGCTCTACAGTCTCAGGA        |

|                    |                                                                                                                                                                                                                                                                                                                                                                                                                                                                                                                                                                                                                                                                          |
|--------------------|--------------------------------------------------------------------------------------------------------------------------------------------------------------------------------------------------------------------------------------------------------------------------------------------------------------------------------------------------------------------------------------------------------------------------------------------------------------------------------------------------------------------------------------------------------------------------------------------------------------------------------------------------------------------------|
| 84_I_GHV1-2_I_GHJ4 | GAGAGCATCACCCAGCAACCACATCTGTCTCTAGAGAATCCCCTGAGAGCTCCGTTCTCACCATGGACTGGACCTGGAGGATCCTCTTCTTGGTGCGAGCAGCCACAGAGCCCCTCCAGGGCCAGCTGGTGAGTCTGGGGCTGAGGTGAAGAAGCCTGGGGCCTCAT<br>TGAAGGTCTCCTGCAAGGCTTCTGGATACACCTTACCCTGCTACTATGTGATTGGGTGCGACAGGCCCTGGACAAGGCTTGAGTGGATGGCATGGATGAACCTAACACTAGTCCGCTCTTTGCACAGAAATTTAGGGCAGGATCGCCGTGACCACGGACACGTCCA<br>TCAGCACAGCCTACATGGAGCTGAGCCGGCTCACATCTGACGACACGGCCGTCTATTCTGTGCGCGCGTATACCATCGACTGTTACTTTACCTCTGGGGCCAGGAAACCTGGTCATGGTCTCCTCAGGGAGTGCATCCGCCCAACCTTTTCCCCTCGTCTCCTGTGA<br>GAATTCGCCGTCGGATACGAGCAGCGTG                                                                                                             |
| 84_I_GHV1-2_I_GHJ4 | GGGAGCATCACCCAGCAACCACATCTGTCTCTAGAGAATCCCCTGAGAGCTCCGTTCTCACCATGGACTGGACCTGGAGGATCCTCTTCTTGGTGCGAGCAGCCACAGAGCCCCTCCAGGGCCAGCTGGTGAGTCTGGGGCTGAGGTGAAGAAGCCTGGGGCCTCAT<br>TGAAGGTCTCCTGCAAGGCTTCTGGATACACCTTACCCTGCTACTATGTGATTGGGTGCGACAGGCCCTGGACAAGGCTTGAGTGGATGGCATGGATGAACCTAACACTAGTCCGCTCTTTGCACAGAAATTTAGGGCAGGATCGCCGTGACCACGGACACGTCCA<br>TCAGTACAGCCTACATGGAGCTGAGCCGGCTCACATCTGACGACACGGCCGTCTATTACTGTGCGCGCGTATACCATCAACGGGTTACTTTACCTCTGGGGCCAGGAAACCTGGTCACCGTCTCCTCAGGGAGTGCATCCGCCCAACCTTTTCCCCTCGTCTCCTGTGA<br>GAATTCGCCGTCGGATACGAGCAGCGTG                                                                                                           |
| 84_I_GHV1-2_I_GHJ4 | GAGAGCATCACCCAGCAACCACATCTGTCTCTAGAGAATCCCCTGAGAGCTCCGTTCTCACCATGGACTGGACCTGGAGGATCCTCTTCTTGGTGCGAGCAGCCACAGAGCCCCTCCAGGGCCAAGTGGTGAGTCTGGGGCTGAGGTGAAGAAGCCTGGGGCCTCAT<br>TAAAGGTCTCCTGCAAGGCTTCTGGATACACCTTACCCTGCTACTATGTGATTGGGTGCGACAGGCCCTGGACAAGGCTTGAGTGGATGGCATGGATGAACCTAACACTAGTCCGCTCTTTGCACAGAAATTTAGGGCAGGATCGCCGTGACCACGGACACGTCCA<br>GACGACAGCCTCCATGGAGCTGAGCAGGCTGACATCTGACGACACGGCCGTCTATTACTGTGCGCGCGTATACCATCAACGGGTTACTTTACCTCTGGGGCCAGGAAACCTGGTCACCGTCTCCTCAGCCTCCACCAAGGGCCCATCGTCTTCCCCTGGCACCTCCTC<br>CAAGAGCACCTCTGGGGCCACAGCGCCCTGGGCTGCTGCTCAAGGACTACTCCCCAACCGGTGACGGTGTCTGTGAACCTCAGGCGCCCTGACCACGGCGTGCACACCTTCCCGCTGTCTCAGTCTCCTCAGGA  |
| 84_I_GHV1-2_I_GHJ4 | GGGAGCATCACCCAGCAACCACATCTGTCTCTAGAGAATCCCCTGAGAGCTCCGTTCTCACCATGGACTGGACCTGGAGGATCCTCTTCTTGGTGCGAGCAGCCACAGAGCCCCTCCAGGGCCAGCTGGTGAGTCTGGGGCTGAGGTGAAGAAGCCTGGGGCCTCAT<br>TGAAGGTCTCCTGCAAGGCTTCTGGATACACCTTACCCTGCTACTATGTGATTGGGTGCGACAGGCCCTGGACAAGGCTTGAGTGGATGGCATGGATGAACCTAACACTAGTCCGCTCTTTGCACAGAAATTTAGGGCAGGATCGCCGTGACCACGGACACGTCCA<br>ATCAGCACAGCCTACATGGAGCTGAGCCGGCTCACATCTGACGACACGGCCGTCTATTACTGTGCGCGCGTATACCATCAACGGGTTACTTTACCTCTGGGGCCAGGAAACCTGGTCACCGTCTCCTCAGGGAGTGCATCCGCCCAACCTTTTCCCCTCGTCTCCTGTGA<br>GAATTCGCCGTCGGATACGAGCAGCGTG                                                                                                          |
| 84_I_GHV1-2_I_GHJ4 | GAGAGCATCACCCAGCAACCACATCTGTCTCTAGAGAATCCCCTGAGAGCTCCGTTCTCACCATGGACTGGACCTGGAGGATCCTCTTCTTGGTGCGAGCAGCCACAGAGCCCCTCCAGGGCCAGCTGGTGAGTCTGGGGCTGAGGTGAAGAAGCCTGGGGCCTCAT<br>TGAAGGTCTCCTGCAAGGCTTCTGGATACACCTTACCCTGCTACTATGTGATTGGGTGCGACAGGCCCTGGACAAGGCTTGAGTGGATGGCATGGATGAACCTAACACTAGTCCGCTCTTTGCACAGAAATTTAGGGCAGGATCGCCGTGACCACGGACACGTCCA<br>ATCAGCACAGCCTACATGGAGCTGAGCAGGCTGACATCTGACGACACGGCCGTCTATTACTGTGCGCGCGTATACCCTCAACTGTTACTTTACCTCTGGGGCCAGGAAACCTGGTCACCGTCTCCTCAGCCTCCACCAAGGGCCCATCGTCTTCCCCTGGCACCTCCTC<br>CCAAGAGCACCTCTGGGGCCACAGCGCCCTGGGCTGCTGCTCAAGGACTACTCCCCAACCGGTGACGGTGTCTGTGAACCTCAGGCGCCCTGACCACGGCGTGCACACCTTCCCGCTGTCTCAGTCTCCTCAGG |
| 2_I_GHV3-48_I_GHJ4 | AGCTCTCAGAGAGGTGCCTTAGCCCTGATTCCAAGGCATTTCCACTTGGTGATCAGCACTGAACACAGAGACTCACCATGGAGTTGGGGCTGTGCTGGTTTTCTTGTGCTATTTAGAAGGTGCCAGTGTGAGGTGCAGTGGTGAGTCTGGGGAGGCTTGG<br>TACAGCCGGGGGCTCCTGAGCCTCTTGTGTGAAGCCTCTGGATTCAACTCAGTAGATATAGCATGAACCTGGGTCGCCAGGCTCCAGGAAAGGGCTGGAGTGGTCTCATACTTATAGCAGAAGTAGTTGAAAGACTATGCACTCTCTGTGAAGGGCCGATTCA<br>CCATCTCCAGAGACAATGCCAAGAGTCAAGTATCTGCAATGAACAGCCTGAGCGACGAGAACAGCGCTGTTTATTACTGTGCCAGAGGTACTTACTACTGGGGCCAGGAAATGTTGTCCAGCTCTCCTCAGCCTCCACCAAGGGCCCATCGTCTTCCCCTGGCACCT<br>CTCCTCCAAGAGCACCTCTGGGGCCACAGCGCCCTGGGCTGCTGCTCAAGGACTACTCCCCAACCGGTGACGGTGTCTGTGAACCTCAGGCGCCCTGACCACGGCGTGCACACCTTCCCGCTGTCTCAGTCTCCTCAGGA       |
| 2_I_GHV3-48_I_GHJ4 | AGCTCTCAGAGAGGTGCCTTAGCCCTGATTCCAAGGCATTTCCACTTGGTGATCAGCACTGAACACAGAGACTCACCATGGAGTTGGGGCTGTGCTGGTTTTCTTGTGCTATTTAGAAGGTGCCAGTGTGCGGTACAGCTGGTGAGTCTGGGGAGGCTTGTGATA<br>CAGCCTGGGGGCTCCTCAGACTCTCCTGTGAGCCTCTGATTCAACTCAGTAGATATAGCATGAACCTGGGTCGCCAGGCTCCAGGAAAGGGCTGGAGTGGTTTTATACATTATAGTAGAAGTACCACAGAGACTACGACGCTCTGTGAGGGCCGATTACCAT<br>CTCCAGAGACAATGCCAAGAGTCAAGTATCTGACATGAACAGCCTGAGCGACGAGACACGGCTGTGTTACTGTGCGAGAGAGTCTCGACTACTGGGGCCAGGAAAGTGTGTTCCAGCTCTCCTCAGCCTCCACCAAGGGCCCATCGTCTTCCCCTGGCACCT<br>CCTCCAAGAGCACCTCTGGGGCCACAGCGCCCTGGGCTGCTGCTCAAGGACTACTCCCCAACCGGTGACGGTGTCTGTGAACCTCAGGCGCCCTGACCACGGCGTGCACACCTTCCCGCTGTCTCAGTCTCCTCAGG           |
| 2_I_GHV3-48_I_GHJ4 | AGCTCTCAGAGAGGTGCCTTAGCCCTGATTCCAAGGCATTTCCACTTGGTGATCAGCACTGAACACAGAGACTCACCATGGAGTTGGGGCTGTGCTGGTTTTCTTGTGCTATTTAGAAGGTGCCAGTGTGCGGTACAGCTGGTGAGTCTGGGGAGGCTTGTGATA<br>ACAGCCTGGGGGCTCCTGAGACTCTCCTGTGAACCTCTGATTCAATTTCAATAATATAGTATGAACCTGGGTCGCCAGGCTCCCGGAAAGGGCCGCAATGATATCATATGTTAGCAGTATAGTGTACCAACGATACGACACTCTGTGAGGGCCGATTACCACCA<br>TCTCCAGAGACAATGCCAAGAGTCTCTATATCTGGAATGAACAGCCTGACTGACGAGGACACGGCTGTGTTACTGTGCGAGAGAGTCTCGACTACTGGGGCCAGGAAAGTGTGTTCCAGCTCTCCTCAGCATCCCCACCAGCCCCAAGTCTTCCCCTGAGCCTCT<br>GCAGCACCCAGCCAGATGGAAAGTGTCTCATGCTGCTGCTGCTCCAGGGCTTCTTCCCCAGGAGCCACTCAGTGTGACCTGGAGCGAAAGCGACAGGGCGTGACCCCGAAGAACTCCC                         |
| 2_I_GHV3-48_I_GHJ4 | AGCTCTCAGAGAGGTGCCTTAGCCCTGATTCCAAGGCATTTCCACTTGGTGATCAGCACTGAACACAGAGACTCACCATGGAGTTGGGGCTGTGCTGGTTTTCTTGTGCTATTTAGAAGGTGCCAGTGTGCGGTACAGCTGGTGAGTCTGGGGAGGCTTGTGATA<br>ACAGCCTGGGGGCTCCTGAGACTCTCCTGTGAACCTCTGATTCAATTTCAATAATATAGTATGAACCTGGGTCGCCAGGCTCCCGGAAAGGGCCGCAATGATATCATATGTTAGCAGTATAGTGTACCAACGATACGACACTCTGTGAGGGCCGATTACCACCA<br>ATCTCCAGAGACAATGCCAAGAGTCTCTATATCTGGAATGAACAGCCTGACTGACGAGGACACGGCTGTGTTACTGTGCGAGAGAGTCTCGACTACTGGGGCCAGGAAAGTGTGTTCCAGCTCTCCTCAGCATCCCCACCAGCCCCAAGTCTTCCCCTGAGCCTCT<br>GCAGCACCCAGCCAGATGGAAAGTGTCTCATGCTGCTGCTGCTCCAGGGCTTCTTCCCCAGGAGCCACTCAGTGTGACCTGGAGCGAAAGCGACAGGGCGTGACCCCGAAGAACTCCC                        |
| 2_I_GHV3-48_I_GHJ4 | AGCTCTCAGAGAGGTGCCTTAGCCCTGATTCCAAGGCATTTCCACTTGGTGATCAGCACTGAACACAGAGACTCACCATGGAGTTGGGGCTGTGCTGGTTTTCTTGTGCTATTTAGAAGGTGCCAGTGTGCGGTACAGCTGGTGAGTCTGGGGAGGCTTGTGATA<br>ACAGCCTGGGGGCTCCTGAGACTCTCCTGTATAGTCTCTGATTCAACTCAGTAGATATAGTATGAACCTGGGTCGCCAGGCTCCAGGAAAGGGCTGGAGTGGTTTTATACATTATCAGTAGTATAGTGTACCAACGATACGACACTCTGTGAGGGCCGATTACCACCA<br>ATCTCCAGAGACAATGCCAAGAGTCTCTCTGCAATGAACACCTGAGAGACGGGGACACGGCCCTGTATTTACTGTGCGAGAGAGTCTTACTACTGGGGCCAGGAAAGTGTGTTCCAGCTCTCCTCAGCATCCCCACCAGCCCCAAGTCTTCCCCTGAGCCTCT<br>GCAGCACCCAGCCAGATGGAAAGTGTCTCATGCTGCTGCTGCTCCAGGGCTTCTTCCCCAGGAGCCACTCAGTGTGACCTGGAGCGAAAGCGACAGGGCGTGACCCCGAAGAACTCCC                       |

|                    |                                                                                                                                                                                                                                                                                                                                                                                                                                                                                                                                                                                                                                                              |
|--------------------|--------------------------------------------------------------------------------------------------------------------------------------------------------------------------------------------------------------------------------------------------------------------------------------------------------------------------------------------------------------------------------------------------------------------------------------------------------------------------------------------------------------------------------------------------------------------------------------------------------------------------------------------------------------|
| 2_I_GHV3-48_I_GHJ4 | AGCTCTCAGAGAGGTGCCTTAGCCCTGATTCCAAGGCATTTCCACTTGGTGATCAGCACTGAACACAGAGGACTCACCATGGAGTTGGGGCTGTGCTGGGTTTTCTTGTGCTATTTAGAAAGGTGTCCACTGTGAGTGCCTGGTGAATCTGGGGGAGGCTTGGTCCAGCCTGGGGGGTCCCTGAGACTCTCCTGTGCAGCTCTGGCTTCAACTTATAGTAGATATAGTAGTAAGTAACTGGTCCGCGAGGTTCCGGGGAGGGGCTGGAATGGATTCATATATCGATAGTGTAGTACTTCGAAAATACGCGAGGCTCTGTGAAGGGCCGATTCACTATCTCCAGAGACAATGCCAAGAGGTCACTGTATCTGCACATGAACAGCCTGAGTACCGAAGACACGGCTATATATTACTGTGCAAGAGAGTCTTACTATTGGGCCAGGGATCCCTGTCCAGCTCTCCTCAGCCTCCACCAAGGGCCCATCGTCTTCCCCTGGCACCTCTCCAAGAGCACCTCTGGGGCACAGCGCCCTGGCTGCTGCTGCTCAAGGACTACTTCCCCAACCGGTGACGGTGTCTGGAACCTCAGCGCCCTGACCAGCGCGTGCACACTTCCCGCTGTCTACAGTCTCAGGA |
| 2_I_GHV3-48_I_GHJ4 | AGCTCTCAGAGAGGTGCCTTAGCCCTGATTCCAAGGCATTTCCACTTGGTGATCAGCACTGAACACAGAGGACTCACCATGGAGTTGGGGCTGTGCTGGGTTTTCTTGTGCTATTTAGAAAGGTGTCCAGTGTGAGTGCAGCTGGTGGAGTCTGGGGAGGCAATGGTGCAGCCGGGGTCCCTGAGACTCTCCTGTGAGCCTCTGATTCAATTTCACTAGATATAGTAGTAAGTAACTGGTCCGCGAGGCTCCAGGGAAGGGCCGGAGTGATTTATACATAGCAGTATCAAACTACGCTGACTCTGTGAGGGCCGATTCACTATCCAGAGACAACGCCAGAACTCACTGTGGCTGCAAAAGAACAGCCTGAGAGACGAGACACGGCTTTTATTACTGTGCGAGAGAGTACTCGACTATTGGGCCAGGGAACCTGTCCAGCTCTCCTCAGCCTCCACCAAGGGCCCATCGTCTTCCCCTGGCACCTCTCCAAGAGCACCTCTGGGGCACAGCGCCCTGGCTGCTGCTCAAGGACTACTTCCCCAACCGGTGACGGTGTCTGGAACCTCAGCGCCCTGACCAGCGCGTGCACACTTCCCGCTGTCTACAGTCTCAGGA                      |
| 2_I_GHV3-48_I_GHJ4 | TCTCAGAGAGGTGCCTTAGCCCTGATTCCAAGGCATTTCCCTTGGCGATCAGCACTGAGCACAGCGGACTCACCATGGAGTTGGGGCTGTCTGGTTTTCTTGTGCTATTTAGAAAGGTGTCCAGTGTGAAAGTGCAGTGTGAGTCTGGGGAGGCTTGTACAGACCGGGGGTCCCTGAGACTCTCCTGTGAGCCTCTGATTCACTTCAATAAATATCCATGAACCTGGTCCGCGAGGCTCCAGGGAAGGGCCGGAGTGATTTATACATAGTACAGTATTAACACTACGCTGACTCTGTGAGGGCCGATTCACTATCCAGAGACAACGCCAGAACTCACTGTCTTCAAAATGGACAACCTGAGAGACGACACGGCTATCTATTACTGTGCGAGAGAGTCTTACTATTGGGCCAGGGAAGTCTGTCAGCGTCTCCGCGCTCCACCAAGGGCCCATCGTCTTCCCCTGGCACCTCTCCAAGAGCACCTCTGGGGCACAGCGCCCTGGCTGCTGCTCAAGGACTACTTCCCCAACCGGTGACGGTGTCTGGAACCTCAGCGCCCTGACCAGCGCGTGCACACTTCCCGCTGTCTACAGTCTCAGGA                                    |
| 2_I_GHV3-48_I_GHJ4 | AGCTCTCAGAGAGGTGCCTTAGCCCTGAAATCCAAGGCATATCCACTTGGTGACCAGCACTGAACACAGAGGACTCACCATGGAGTTGGGGCTGTGCTGGTTTTCTTGTGCTATTTAGAAAGGTGTCCCTTGTGAGTGCAACTGGTGGAGTCTGGGGAGGCTTGTACAGCCGGGGGGTCCCTGAGACTCTCCTGTGAAGCCTCTGATTCACTTCACTAGATATAGTAGTAAGTAACTGGTCCGCGAGGCTCCAGGGAAGGGCCGGAGTGATTTATACATAGTACAGTATTAACACTACGCTGACTCTGTGAGGGCCGATTCACTATCCAGAGACAACGCCAAGTGTGATCTGCAGATGAACAGCCTGAGCGACGAGACACGGCTTTTATTATTGTCGAGAGGTGCTTACTATTGGGCCAGGGAATGTTGTCAGTCTCCTCAGCCTCCACCAAGGGCCCATCGTCTTCCCCTGGCACCTCTCCAAGAGCACCTCTGGGGCACAGCGCCCTGGCTGCTGCTCAAGGACTACTTCCCCAACCGGTGACGGTGTCTGGAACCTCAGCGCCCTGACCAGCGCGTGCACACTTCCCGCTGTCTACAGTCTCAGGA                            |
| 2_I_GHV3-48_I_GHJ4 | AGCTCTCAGAGAGGTGCCTTAGCCCTGATTCCAAGGCATTTCCACTTGGTGATCAGCACTGAACACAGAGGACTCACCATGGAGTTGGGGCTGATTGGTTTTCTTGTGCTTTTTTTGGAGTGTCCACTGTGAGTGCAACTGGTGGAGTCTGGGGAGGCTTGTCCAGTCGGGGGGTCCCTGAGACTCTCCTGCACAGCCTCTGATTCACTTAAATATAGTAGTAAGTAACTGGTCCGCGAGGCTCCAGGGAAGGGCCGGAGTGTGATCGCATACTAGCAGTACAGTACAAACAATATGAGACTCTGTGAGGGCCGATTCACTATCCAGAGACAATGACAAGAACTCAATGTTTTCTGAAATGAGCAGCCTGACAGACGCGGACACGGCTGTATATTACTGTGCGAGAGAGTCTTACTACTGGGCCAGGGAAGCCCTGTGACCGTCTCCTCAGCATCCCCACCAGCCCCAAGTCTTCCCCTGAGCCTCTGCAACCCAGCCAGATGGGAACGTGGTATCGCCTGCTGCTGCTCAAGGACTACTTCCCCAACCGGTGACGGTGTCTGGAACCTCAGCGCCCTGACCAGCGCGTGCACACTTCCCGCTGTCTACAGTCTCAGGA                  |
| 2_I_GHV3-48_I_GHJ4 | AGCTCTCAGAGAGGTGCCTTAGCCCTGATTCCAAGGCATTTCCACTTGGTGATCAGCACTGAACACAGAGGACTCACCATGGAGTTGGGGCTGTACTGGTTTTCTTGTGCTATTTAGAAAGGTGTCCAGTGTGAGTGCAGCTGGTGGAGTCTGGGGAAAATGATACAGTCCCGGGGGTCCCTGAGACTCTCCTGTGCAGCCTCTGATTCACTTCACTAAATATGCCATGAACCTGGTCCGCGAGGCTCCAGTGTGAGGGCTGGAGTGGATTGCATACATCAATAAAGACAGTGAAGCCATGATCTACTCAGACTTTGTGAAGGGCCGATTCACTATCCAGAGACAATGACAAGAACTCAATGATCTAGAAATGAATAGCCTGAGAGACGAGACACGGCTGTGATTACTGTGCGAGAGAGTCTTACTACTGGGCCAGGGAAGCCCTGTGACCGTCTCCTCAGCATCCCCACCAGCCCCAAGTCTTCCCCTGAGCCTCTCCAAGAGCACCTCTGGGGCACAGCGCCCTGGCTGCTGCTCAAGGACTACTTCCCCAACCGGTGACGGTGTCTGGAACCTCAGCGCCCTGACCAGCGCGTGCACACTTCCCGCTGTCTACAGTCTCAGGA           |
| 2_I_GHV3-48_I_GHJ4 | ACCTCTCAGAGAGGTGCCTTAGCTGATTCCAAGGCATTTCCACTTGGTGATCAGCACTGAACACAGAGGACTCACCATGGAGTTGGGGCTGTGCTGGTTTTCTTGTGCTATTTAGCAGTGTCCAGTGTGAGTGCATTAAGTGTGAGTCTGGGGAGGCTTGTACAGCCGGGGGGTCCCTGAGACTCTCCTGTGCAGCCTCTGATTCACTTCACTAGATACAGCATGAACCTGGTCCGCGAGGCTCCAGGGAAGGGCCGGAGTGTGATTTATACATGACAGTACTAGTGTATCCCCAAAATACGCGACTCTGTGAAGGGCCGATTCACTATCTCCAGAGACAATGCCAAGAGGGCGCTGTCTGCAGCTGACCAGCCTGAGAGACGAGACACGGCTGTCTATTATTGTGCGAGAGGGGCTTACTACTGGGCCAGGGAAGCCCTGTGACCGTCTCCTCAGCATCCCCACCAGCCCCAAGTCTTCCCCTGAGCCTCTGCAGCACCAGCCAGATGGGAACGTGGTATCGCCTGCTGCTGCTCAAGGACTACTTCCCCAACCGGTGACGGTGTCTGGAACCTCAGCGCCCTGACCAGCGCGTGCACACTTCCCGCTGTCTACAGTCTCAGGA            |
| 2_I_GHV3-48_I_GHJ4 | AGCTCTCAGAGAGGTGCCTTAGCCCTGATTCCAAGGCATTTCCACTTGGTGATCAGCACTGAACACAGAGGACTCACCATGGAGTTGGGGCTGTGCTGGTTTTCTTGTGCTATTTAGAAAGGTGTCCAGTGTGCGTACAGCTGATGAGTCTGGGGAGGCTTGTACAGCCGGGGGGTCCCTGAGACTCTCCTGTGAAGCCTCTGATTCACTTCAATAAATATAGTAGTAAGTAACTGGTCCGCGAGGCTCCCGGGAAGGGCTGGAATGATATATAGTGTAGCAGTATAGTGTACCAACAGTACGCGACTCTGTGAGGGCCGATTCACTATCTCCAGAGACAATGACAAGAACTCACTATATCTGAAATGAACAGCCTGACTGACGGGGACACGGCTATCTATTACTGTGCGAGAGAGTACTTACTACTGGGCCAGGGAAGTGTGTCACCGTCTCCTCAGCATCCCCACCAGCCCCAAGTCTTCCCCTGAGCCTCTGCAGCACCAGCCAGATGGGAACGTGGTATCGCCTGCTGCTGCTCAAGGACTACTTCCCCAACCGGTGACGGTGTCTGGAACCTCAGCGCCCTGACCAGCGCGTGCACACTTCCCGCTGTCTACAGTCTCAGGA          |
| 2_I_GHV3-48_I_GHJ4 | AGCTCTCAGAGAGGTGCCTTAGCCCTGATTCCAAGGCATTTCCACTTGGTGATCAGCACTGAACACAGAGGACTCACCATGGAGTTGGGGCTGTGCTGGTTTTCTTGTGCTATTTAGAAAGGTGTCCAGTGTGCGTACAGCTGATGAGTCTGGGGAGGCTTGTACAGCCGGGGGGTCCCTGAGACTCTCCTGTGAAGCCTCTGATTCACTTCAATAAATATAGTAGTAAGTAACTGGTCCGCGAGGCTCCCGGGAAGGGCTGGAATGATATATAGTGTAGCAGTATAGTGTACCAACAGTACGCGACTCTGTGAGGGCCGATTCACTATCTCCAGAGACAATGACAAGAACTCACTATATCTGAAATGAACAGCCTGACTGACGGGGACACGGCTATCTATTACTGTGCGAGAGAGTACTTACTACTGGGCCAGGGAAGTGTGTCACCGTCTCCTCAGCATCCCCACCAGCCCCAAGTCTTCCCCTGAGCCTCTGCAGCACCAGCCAGATGGGAACGTGGTATCGCCTGCTGCTGCTCAAGGACTACTTCCCCAACCGGTGACGGTGTCTGGAACCTCAGCGCCCTGACCAGCGCGTGCACACTTCCCGCTGTCTACAGTCTCAGGA          |
| 2_I_GHV3-48_I_GHJ4 | AGCTCTCAGAGAGGTGCCTTAGCCCTGATTCCAAGGCATTTCCACTTGGTGATCAGCACTGAACACAGAGGACTCACCATGGAGTTGGGGCTGTGCTGGTTTTCTTGTGCTATTTAGAAAGGTGTCCAGTGTGAGTGCAGTGTGAGTCTGGGGAGGCTTGTACAGCCGGGGGGTCCCTCAGACTTTCATGTACAGCCTCTGTTTTCACTTCACTAAATACAGCATGAACCTGGTCCGCGAGGCTCCAGGGAAGGGCCGGAGTGTGATTTATACATGATTTAGCAGTATAGTGTACCAACAGTACGCGACTCTGTGAGGGCCGATTCACTATCTCCAGAGACAATGACAAGAACTCACTATATCTGAAATGAACAGCCTGACTGACGGGGACACGGCTATCTATTACTGTGCGAGAGAGTACTTACTACTGGGCCAGGGAAGTGTGTCACCGTCTCCTCAGCATCCCCACCAGCCCCAAGTCTTCCCCTGAGCCTCTGCAGCACCAGCCAGATGGGAACGTGGTATCGCCTGCTGCTGCTCAAGGACTACTTCCCCAACCGGTGACGGTGTCTGGAACCTCAGCGCCCTGACCAGCGCGTGCACACTTCCCGCTGTCTACAGTCTCAGGA        |
| 2_I_GHV3-48_I_GHJ4 | AGCTCTCAGAGAGGTGTCTTAGCCCTGATTCCAAGGCATTTCCACTTGGTGATCAGCACTGAACACAGAGGACTCACCATGGAAATGGGGCTGTGCTGGTTTTCTTGTGCTATTTAGAAAGGTGTCCAGTGTGAGTGCAGTGTGAGTCTGGGGAGGCTTGTACAGCCGGGGGGTCCCTGAGACTCTCTGTGCAGCCTCTGATTAAATTCAGTAGATATAGTAGTAAGTAACTGGTCCGCGAGGCTCCAGGGAAGGGCCGGAGTGTGATTTATACATGATTTAGCAGTATAGTGTACCAACAGTACGCGACTCTGTGAGGGCCGATTCACTATCTCCAGAGACAATGACAAGAACTCACTGACTTGAATGAACAGCCTGAGAGACGAGACACGGCTGTCTATTATTGTGCGAGAGAGTCTTACTACTGGGCCAGGGAAGCCCTGTGACCGTCTCCTCAGCATCCCCACCAGCCCCAAGTCTTCCCCTGAGCCTCTGCAGCACCAGCCAGATGGGAACGTGGTATCGCCTGCTGCTGCTCAAGGACTACTTCCCCAACCGGTGACGGTGTCTGGAACCTCAGCGCCCTGACCAGCGCGTGCACACTTCCCGCTGTCTACAGTCTCAGGA          |









|                      |                                                                                                                                                                                                                                                                                                                                                                                                                                                                                                                                                                                                                                                                                             |
|----------------------|---------------------------------------------------------------------------------------------------------------------------------------------------------------------------------------------------------------------------------------------------------------------------------------------------------------------------------------------------------------------------------------------------------------------------------------------------------------------------------------------------------------------------------------------------------------------------------------------------------------------------------------------------------------------------------------------|
| 2_I_GHV3-48_I_GHJ4   | AGCTCTCAGAGAGGTGCTTCCCTGATCCCAAGGCATTCCACTTGGTGATCAGCACTGAACACAGAGGACTCACCATGGAGTTGGGGCTGTGCTGGGTTTTCTTGTGCTATTTAGCAGGTGTCAGTGTGAGGTGCACTAGTGCAGTCTGGGGAGGCTCGTACAGCCGGGGGGTCCCTGAGACTCTCCTGTGCAGCCTCTGGATTCACTTCAGTCAAGTATGAACTGGTCCGCGAGCTCCAGGGGAAGGGCCGGAGTGGATCTCGTACATTGATAGTAGTGAAGCAGAAGATATGCAGACTCTGTGAAGGGCCGATTTCATCGTTTTCCAGAGACAATGCCAAGAGGGCACTGTCTGTCAACTAATAGCCTGAGAGACGAGACACGGCTGTCTACTGTGCGAGAGAGTGTCTTACTACTGGGGCCAGGGAGCCCTGTCCACCTCTCGTCCAGCTCCACCAAGGGCCCATCGTCTCCCTGGCGCCTGTCCAGAGCACCTCCGAGAGCACAGCGCCCTGGGCTGCTGTCAAGGACTACTTCCCGAACCGGTGACGGTGTCTGGAACACTCAGCGCTCTGACCAGCGCGTGCACACCTCCAGCTGTCTACAGTCTCAGGA                                                     |
| 2_I_GHV3-48_I_GHJ4   | AGCTCTCAGAGAGGTGCTTCCCTGATCCCAAGGCATTCCACTTGGTGATCAGCACTGAACACAGAGGACTCACCATGGAGTTGGGGCTGTGCTGGGTTTTCTTGTACTATTTAGAAAGGTGTCGGGTGTCGGTGCAGTTGGTGAAGTTCGGGGAGGCTTGGTAATGCCCGGGGGTCCCTGAGACTCTCCTGTGCAGCCTCTGGATTCACTTCAGTAAATTTGCAATGAACGGTCCGCGAGCTCCAGGGGAAGGGCCGGAGTGGATTCATATATTAGCAGTAAAGTGAAGGCATATCGTACGCAGACTCCGTGAAGGGCCGATTACCCGTCTCCAGAGACAATGACAAGAAATCAATTTATCTCAAATGAACAGCCTGAGAGACGAGGACACGGCTGTCTACTACTGTGCGAGAGAGTGTCTTACTACTGGGGCCAGGGAGCCCTGTCCACCTCTCCTCAGCATCCCCACCAGCCCCAAGTCTTCCCGTGTGAGCTCTGCGAGCACCAGCCAGATGGGAACGTGTATCGCTGCTGCTGCTGCAAGGACTACTTCCCGAACCGGTGACGGTGTCTGGAACACTCAGCGCTCTGACCAGCGCGTGCACACCTCCAGCTGTCTACAGTCTCAGGA                                     |
| 2_I_GHV3-48_I_GHJ4   | AGCTCTCAGAGAGGTGCTTCCCTGATCCCAAGGCATTCCACTTGGTGATCAGCACTGAACACAGAGGACTCACCATGGAGTTGGGGCTGTGCTGGGTTTTCTTGTGCTATTTAGCAGGTGTCAGTGTGAGGTGCAGTGTGGAGTCTGGGGAGGCTTGGTACAGCCGGGGGGTCCCTGAGACTCTCCTGTGCAGCCTCTGGATTCACTTCAGTAGATATAGTATGAACTGGTCCGCGAGCTCCAGGGGAAGGGCCGGAGTGGATTCATACATTGACAGTAGTGTGAACCAGAAGATACGCAGACTCTGTGAAGGGCCGATTACCATCTCCAGAGACAATGCCAAGAGGGCACTGTCTGTGCAGCTGAACAGCCTGAGAGACGAGACACGGCTGTCTACTACTGTGCGAGAGAGTGTCTTACTACTGGGGCCAGGGAGCCCTGTCCACCTCTCCTCAGCTCCACCAAGGGCCCATCGTCTCCCTGGCGCCTGTCCAGAGACGACTCCGAGAGCACAGCGCCCTGGGCTGCTGCTGCAAGGACTACTTCCCGAACCGGTGACGGTGTCTGGAACACTCAGCGCTCTGACCAGCGCGTGCACACCTCCAGCTGTCTACAGTCTCAGGA                                            |
| 131_I_GHV3-23_I_GHJ6 | AGCTCTGAGAGAGGAGCCAGCCCTGGGATTTTCAGGTGTTTTCATCTGGTGATCAGCACTGAACACAGAGAACTCACCATGGAGTTGGGGCTGAGTGGCTTTTTCTTGTGCTATTTAAAGGTGTCAAGTGTGAGGTGAAGTTGGTGAAGTCTGGGGAGGCTTGGTACAGCCTGGGGAGTCCCTGAGACTCTCCTGTGCAGCCTCTGGATTCACTTCAGTAAATTTGCAATGAACGGTCCGCGAGCTCCAGGGGAAGGGCCGGAGTGGATTCATACATTGACAGTAGTGTGAACCAGAAGATACGCAGACTCCGTGAAGGGCCGATTACCTCTCCAGAGACAATCCAGAACACCTGTATCTCAAATGAACAGCCTGAGCGCGATGACACGGCCATATATTACTGTGCGAAGACTGTGGCCCTTGTGCGAGTGTGCTCCACGACGCGCGCCGGAACCTTTGGAGTCTGGGGCCAAGGACCACGGTCCACCGTCTCAGCCTCCACCAAGGGCCATCGTCTTCCCTGGCACCTCTCCAAGAGCACCTCTGGGGCACAGCGCCCTGGGCTGCTGCTGCAAGGACTACTTCCCGAACCGGTGACGGTGTCTGGAACACTCAGCGCCCTGACCAGCGCGTGCACACCTCCCGCTGTCTACAGTCTCAGGA     |
| 131_I_GHV3-23_I_GHJ6 | AGCTCTGAGAGAGGAGCCAGCCCTGGGATTTTCAGGTGTTTTCAITTTGGTGATCAGCACTGAACACAGAGAGGACTCACCATGGAGTTGGGGCTGAGTGGCTTTTTCTTGTGCTATTTAAAGGTGTCCAGTGTGAGGTGAAGCTGGTGAAGTCTGGGGAGGCTTGGTACAGCCGGGGGGTCCCTGAGACTCTCCTGTGCAGCCTCTGGATTCACTTCAGTAAATTTGCAATGAACGGTCCGCGAGCTCCAGGGGAAGGGCCGGAGTGGATTCAGGATTTAGTTTGGGGGATAAACACATTTACACAGACTCCGTGAAGGGCCGTTTCCATCTCCAGAGACAATCCAAAGAACACCTGTATCTGCAATGAACAGCCTGAGCCGAGACACGGCCGTATATTACTGTGCGAAGACTGTGGCCCTTGTGCGAGTGTGCTCCACGACGCGCGCCGGAGCTTTGGAGTCTGGGGCCAAGGACCACGGTCCACCGTCTCCACAGCCTCCACCAAGGGCCATCGTCTTCCCTGGCACCTCTCCAAGAGCACCTCTGGGGCACAGCGCCCTGGGCTGCTGCTGCAAGGACTACTTCCCGAACCGGTGACGGTGTCTGGAACACTCAGCGCCCTGACCAGCGCGTGCACACCTCCCGCTGTCTACAGTCTCAGGA  |
| 131_I_GHV3-23_I_GHJ6 | AGCTCTGAGAGAGGAGCCAGCCCTGGGATTTTCAGGTGTTTTCAITTTGGTGATCAGCACTGAACACAGAGAGGACTCACCATGGAGTTGGGGCTGAGTGGCTTTTTCTTGTGCTATTTAAAGGTGTCCAGTGTGAGGTGAAGCTGGTGAAGTCTGGGGAGGCTTGGTACAGCCTGGGGGGTCCCTGAGACTCTCCTGTGCAGCCTCTGGATTCACTTCAGTAAATTTGCAATGAACGGTCCGCGAGCTCCAGGGGAAGGGCCGGAGTGGATTCAGGATTTAGTTTGGGGGATAAACACATTTACACAGACTCCGTGAAGGGCCGTTTCCATCTCCAGAGACAATCCAAAGAACACCTGTATCTGCAATGAACAGCCTGAGCCGAGACACGGCCATATATTACTGTGCGAAGACTGTGGCCCTTGTGCGAGTGTGCTCCACGACGCGCGCCGGAGCTTTGGAGTCTGGGGCCAAGGACCACGGTCCACCGTCTCCACAGCCTCCACCAAGGGCCATCGTCTTCCCTGGCACCTCTCCAAGAGCACCTCTGGGGCACAGCGCCCTGGGCTGCTGCTGCAAGGACTACTTCCCGAACCGGTGACGGTGTCTGGAACACTCAGCGCCCTGACCAGCGCGTGCACACCTCCCGCTGTCTACAGTCTCAGGA |
| 131_I_GHV3-23_I_GHJ6 | AGCTCTGAGAGAGGAGCCAGCCCTGGGATTTTCAGGTGTTTTCAITTTGGTGATCAGCACTGAACACAGAGAACTCACCATGGAGTTGGGGCTGAGTGGCTTTTTCTTGTGCTATTTAAAGGTGTCCAGTGTGAGGTGAAGCTGGTGAAGTCTGGGGAGGCTTGGTACAGCCGGGGGGTCCCTGAGACTCTCCTGTGCAGCCTCTGGATTCACTTCAGTAAATTTGCAATGAACGGTCCGCGAGCTCCAGGGGAAGGGCCGGAGTGGATTCAGGATTTAGTTTGGGGGATAAACACATTTACACAGACTCCGTGAAGGGCCGTTTCCATCTCCAGAGACAATCCAAAGAACACCTGTATCTGCAATGAACAGCCTGAGCCGAGACACGGCCATATATTACTGTGCGAAGACTGTGGCCCTTGTGCGAGTGTGCTCCACGACGCGCGCCGGAGCTTTGGAGTCTGGGGCCAAGGACCACGGTCCACCGTCTCCTCAGCCTCCACCAAGGGCCATCGTCTTCCCTGGCACCTCTCCAAGAGCACCTCTGGGGCACAGCGCCCTGGGCTGCTGCTGCAAGGACTACTTCCCGAACCGGTGACGGTGTCTGGAACACTCAGCGCCCTGACCAGCGCGTGCACACCTCCCGCTGTCTACAGTCTCAGGA    |
| 131_I_GHV3-23_I_GHJ6 | AGCTCTGAGAGAGGAGCCAGCCCTGGGATTTTCAGGTGTTTTCAITTTGGTGATCAGCACTGAACACAGAGAACTCACCATGGAGTTGGGGCTGAGTGGCTTTTTCTTGTGCTATTTAAAGGTGTCCAGTGTGAGGTGAAGCTGGTGAAGTCTGGGGAGGCTTGGTACAGCCGGGGGGTCCCTGAGACTCTCCTGTGCAGCCTCTGGATTCACTTCAGTAAATTTGCAATGAACGGTCCGCGAGCTCCAGGGGAAGGGCCGGAGTGGATTCAGGATTTAGTTTGGGGGATAAACACATTTACACAGACTCCGTGAAGGGCCGTTTCCATCTCCAGAGACAATCCAAAGAACACCTGTATCTGCAATGAACAGCCTGAGCCGAGACACGGCCATATATTACTGTGCGAAGACTGTGGCCCTTGTGCGAGTGTGCTCCACGACGCGCGCCGGAGCTTTGGAGTCTGGGGCCAAGGACCACGGTCCACCGTCTCCTCAGCCTCCACCAAGGGCCATCGTCTTCCCTGGCACCTCTCCAAGAGCACCTCTGGGGCACAGCGCCCTGGGCTGCTGCTGCAAGGACTACTTCCCGAACCGGTGACGGTGTCTGGAACACTCAGCGCCCTGACCAGCGCGTGCACACCTCCCGCTGTCTACAGTCTCAGGA    |
| 131_I_GHV3-23_I_GHJ6 | AGCTCTGAGAGAGGAGCCAGCCCTGGGATTTTCAGGTGTTTTCAITTTGGTGATCAGCACTGAACACAGAGAACTCACCATGGAGTTGGGGCTGAGTGGCTTTTTCTTGTGCTATTTAAAGGTGTCCAGTGTGAGGTGAAGCTGGTGAAGTCTGGGGAGGCTTGGTACAGCCGGGGGGTCCCTGAGACTCTCCTGTGCAGCCTCTGGATTCACTTCAGTAAATTTGCAATGAACGGTCCGCGAGCTCCAGGGGAAGGGCCGGAGTGGATTCAGGATTTAGTTTGGGGGATAAACACATTTACACAGACTCCGTGAAGGGCCGTTTCCATCTCCAGAGACAATCCAAAGAACACCTGTATCTGCAATGAACAGCCTGAGCCGAGACACGGCCATATATTACTGTGCGAAGACTGTGGCCCTTGTGCGAGTGTGCTCCACGACGCGCGCCGGAGCTTTGGAGTCTGGGGCCAAGGACCACGGTCCACCGTCTCCTCAGCCTCCACCAAGGGCCATCGTCTTCCCTGGCACCTCTCCAAGAGCACCTCTGGGGCACAGCGCCCTGGGCTGCTGCTGCAAGGACTACTTCCCGAACCGGTGACGGTGTCTGGAACACTCAGCGCCCTGACCAGCGCGTGCACACCTCCCGCTGTCTACAGTCTCAGGA    |
| 131_I_GHV3-23_I_GHJ6 | GAGAGAGGAGCCAGCCCTGGGATTTTCAGGTGTTTTCAITTTGGTGATCAGCACTGAACACAGAGAACTCACCATGGAGTTGGGGCTGAGTGGCTTTTTCTTGTGCTATTTAAAGGTGTCCAGTGTGAGGTGAAGCTGGTGAAGTCTGGGGAGGCTTGGTACAGCTGGGGGGTCCCTGAGACTCTCCTGTGCAGCCTCTGGATTCACTTCAGTAAATTTGCAATGAACGGTCCGCGAGCTCCAGGGGAAGGGCCGGAGTGGATTCAGGATTTAGTTTGGGGGATAAACACATTTACACAGACTCCGTGAAGGGCCGTTTCCATCTCCAGAGACAATCCAAAGAACACCTGTATCTGCAATGAACAGCCTGAGCCGAGACACGGCCATATATTACTGTGCGAAGACTGTGGCCCTTGTGCGAGTGTGCTCCACGACGCGCGCCGGAGCTTTGGAGTCTGGGGCCAAGGACCACGGTCCACCGTCTCCTCAGCCTCCACCAAGGGCCATCGTCTTCCCTGGCACCTCTCCAAGAGCACCTCTGGGGCACAGCGCCCTGGGCTGCTGCTGCAAGGACTACTTCCCGAACCGGTGACGGTGTCTGGAACACTCAGCGCCCTGACCAGCGCGTGCACACCTCCCGCTGTCTACAGTCTCAGGA          |

|                      |                                                                                                                                                                                                                                                                                                                                                                                                                                                                                                                                                                                                                                                                                                  |
|----------------------|--------------------------------------------------------------------------------------------------------------------------------------------------------------------------------------------------------------------------------------------------------------------------------------------------------------------------------------------------------------------------------------------------------------------------------------------------------------------------------------------------------------------------------------------------------------------------------------------------------------------------------------------------------------------------------------------------|
| 181_I_GHV3-23_I_GHJ4 | AGCTCTGAGAGAGAGCCAGCCCTGGGATTTTCAGTGTTTTCTTTGGTGATCAGGACTGAACAGAGAGAAGCTCACCATGGAGTTTGGGCTGAGCTGGCTTTTCTTGTTGGCCATTGTAAGAGTTGCCAGTGTGATGTGCAGCTGGTGGAGTCCGGGGGAGGCTTCA<br>AAAAGCCGGGGGGTCCCTGACACTCTCCTGTGCAGCCTCTGATTACCTTTAGAGACTATGCCATGACCTGGTCCGCGAGTCCAGGGAGGGGGCTGGAGAGCGTCTCAGTTATTAGCGGTAGTGAAGAGGCACATTCTACTCCGACTCCGTGAAGGGCCGCTTCA<br>CATCTCCAGAGACAATTCAGGAACACACTGTCTCTGCAAATGAACAGCCTGAGAGCCGAGGACACGGCCATATTTACTGTGCGAAAGGAAGAGGGCAGCAGTTGATCTACCGACTGGGGCCGGGAATCCTGGTACCCTCTCCTCAGCCTCCACCAAGGCCCATCGT<br>CTTCCCCCTGGCACCTCTCCAAGAGCACCTCTGGGGGCACAGCGCCCTGGCTGCTGTTCAAGGACTACTCCCCAACCGGTGACGGTGTCTGTGAAGTCAAGCGCCCTGACCAGCGCGTGCACACCTTCCGGCTGTCTACAGTCTCAGGA                |
| 181_I_GHV3-23_I_GHJ4 | AGCTCTGAGAGAGAGCCAGCCCTGGGATTTTCAGTGTTTTCTTTGGTGATCAGGACTGAACAGAGAGAAGCTCACCATGGAGTTTGGGCTGAGCTGGCTTTTCTTGTTGGCTATTGTAAGAGTTGCCAGTGTGATGTGCAGCTGGTGGAGTCCGGGGGAGGCTTCA<br>AAAAGCCGGGGGGTCCCTGACACTCTCCTGTGCAGCCTCTGATTACCTTTAGAGACTATGCCATGACCTGGTCCGCGAGTCCAGGGAGGGGGCTGGAGAGCGTCTCAGTTATTAGCGGTAGTGAAGAGGCACATTCTACTCCGACTCCGTGAAGGGCCGCTTCA<br>CATCTCCAGAGACAATTCAGGAACACACTGTCTCTGCAAATGAACAGCCTGAGAGCCGAGGACACGGCCATATTTACTGTGCGAAAGGAAGAGGGCAGCAGTTGATCTACCGACTGGGGCCGGGAACCTGGTACCCTCTCCTCAGCCTCCACCAAGGCCCATCGTCT<br>TTCCCCCTGGCACCTCTCCAAGAGCACCTCTGGGGGCACAGCGCCCTGGCTGCTGTTCAAGGACTACTCCCCAACCGGTGACGGTGTCTGTGAAGTCAAGCGCCCTGACCAGCGCGTGCACACCTTCCGGCTGTCTACAGTCTCAGGA                |
| 181_I_GHV3-23_I_GHJ4 | AGCTCTGAGAGAGAGCCAGCCCTGGGATTTTCAGTGTTTTCACTTGGTGGTGCAGGACTGAACAGAGAGAAGCTCACCATGGAGTTTGGGCTGAGCTGGCTTTTCTTGTTGGCTATTGTAAGAGTTGCCAGTGTGATGTGCAGCTGGTGGAGTCTGGGGCGGCTTG<br>GTACAGCCTGGGGGGTCCCTGACACTCTCCTGTGCAGCCTCTGATTACCTTTAGAGACTATGCCATGACTTGGTCCGCGAGTCCAGGGAGGGGGCTGGAGAGCGTCTCAGTTATTAGCGGTAGTGAAGAGGCACATTCTACTCCGACTCCGTGAAGGGCCGCTTCA<br>ACCATCTCCAGAGACAATTCAGGAACACACTGTCTCTGCAAATGAACAGCCTGAGAGCCGAGGACACGGCCATATTTACTGTGCGAAAGGAAGAGGGCAGCAGTTGATCTACCGACTGGGGCCAGGAACCCCGTACCCTCTCCTCAGCCTCCACCAAGGCCCATCGT<br>GTCTTCCCCCTGGCACCTCTCCAAGAGCACCTCTGGGGGCACAGCGCCCTGGCTGCTGTTCAAGGACTACTCCCCAACCGGTGACGGTGTCTGTGAAGTCAAGCGCCCTGACCAGCGCGTGCACACCTTCCGGCTGTCTACAGTCTCAGGA           |
| 181_I_GHV3-23_I_GHJ4 | AGCTCTGAGAGAGAGCCAGCCCTGGGATTTTCAGTGTTTTCTTTGGTGATCAGGACTGAACAGAGAGAAGCTCACCATGGAGTTTGGGCTGAGCTGGCTTTTCTTGTTGGCTATTGTAAGAGTTGCCAGTGTGATGTGCAGCTGGTGGAGTCCGGGGGAGGCTTCA<br>AAAAGCCGGGGGGTCCCTGACACTCTCCTGTGCAGCCTCTGATTACCTTTAGAGACTATGCCATGACTTGGTCCGCGAGTCCAGGGAGGGGGCTGGAGAGCGTCTCAGTTATTAGCGGTAGTGAAGAGGCACATTCTACTCCGACTCCGTGAAGGGCCGCTTCA<br>CATCTCCAGAGACAATTCAGGAACACACTGTCTCTGCTAATGAACAGCCTGAGAGCCGAGGACACGGCCATATTTACTGTGCGAAAGGAAGAGGCACAGTTGATCTACCGACTGGGGCCGGGAACCTGGTACCCTCTCCTCAGCCTCCACCAAGGCCCATCGTCT<br>TTCCCCCTGGCACCTCTCCAAGAGCACCTCTGGGGGCACAGCGCCCTGGCTGCTGTTCAAGGACTACTCCCCAACCGGTGACGGTGTCTGTGAAGTCAAGCGCCCTGACCAGCGCGTGCACACCTTCCGGCTGTCTACAGTCTCAGGA                  |
| 181_I_GHV3-23_I_GHJ4 | AGCTCTGAGAGAGAGCCAGCCCTGGGATTTTCAGTGTTTTCTTTGGTGATCAGGACTGAACAGAGAGAAGCTCACCATGGAGTTTGGGCTGAGCTGGCTTTTCTTGTTGGCTATTGTAAGAGTTGCCAGTGTGATGTGCAGCTGGTGGAGTCCGGGGCGGCTTG<br>TACAGCCTGGGGGGTCCCTGAGACTCTCCTGTAGCCTCTGATTACCTTTAGAGACTATGCCATGAGTTGGTGGCGCAGGCTCCAGGGAGGGGGCTGGAGTGGTCTCAGTTATTAGTGTAGTGGTGGTGGCACATTCTACACAGACTCCGTGAAGGGCCGCTTCA<br>CCATCTCCAGAGACAATTCAGGAACACACTGTCTCTGCTAATGAACAGCCTGAGAGCCGAGGACACGGCCATATTTACTGTGCGAAAGGAAGAGGGCAGCAGTTGATCTACCGACTGGGGCCAGGAACCTGGTACCCTCTCCTCAGCCTCCACCAAGGCCCATCGT<br>CTTCCCCCTGGCACCTCTCCAAGAGCACCTCTGGGGGCACAGCGCCCTGGCTGCTGTTCAAGGACTACTCCCCAACCGGTGACGGTGTCTGTGAAGTCAAGCGCCCTGACCAGCGCGTGCACACCTTCCGGCTGTCTACAGTCTCAGGA                  |
| 181_I_GHV3-23_I_GHJ4 | ATGGGGGAGAGAGAGCCAGCCCTGGGATTTTCAGTGTTTTCTTTGGTGATCAGGACTGAACAGAGAGAAGCTCACCATGGAGTTTGGGCTGAGCTGGCTTTTCTTGTTGGCTATTGTAAGAGTTGCCAGTGTGATGTGCAGCTGGTGGAGTCCGGGGGAGGCTTCA<br>AAAAGCCGGGGGGTCCCTGACACTCTCCTGTGCAGCCTCTGATTACCTTTAGAGACTATGCCATGACTTGGTCCGCGAGTCCAGGGAGGGGGCTGGAGAGCGTCTCAGTTATTAGCGGTAGTGAAGAGGCACATTCTACTCCGACTCCGTGAAGGGCCGCTTCA<br>CCATCTCCAGAGACAATTCAGGAACACACTGTCTCTGCAAATGAACAGCCTGAGAGCCGAGGACACGGCCATATTTACTGTGCGAAAGGAAGAGGGCAGCAGTTGATCTACCGACTGGGGCCAGGAACCTGGTACCCTCTCCTCAGCCTCCACCAAGGCCCATCGG<br>TCTTCCCCCTGGCACCTCTCCAAGAGCACCTCTGGGGGCACAGCGCCCTGGCTGCTGTTCAAGGACTACTCCCCAACCGGTGACGGTGTCTGTGAAGTCAAGCGCCCTGACCAGCGCGTGCACACCTTCCGGCTGTCTACAGTCTCAGGA               |
| 232_I_GHV3-73_I_GHJ5 | AGGTCGTGGAGAGAGCTCCAGCCTTGGGATTTCCAGCTGTCTCACTCGGTGATCGGCACTGAATACAGAGACTCACCATGGAGCTTGGGCTGAGCTGGGTTTCTTGTGCTATTGTAAGAGTTGCCAGTGTGAGTGTGAGTGTGAGTCCGGGGGGGGCTT<br>GGTCCAGCCGGGGGGTCCCTGAACTCTCCTGTGCAGCCTCTGGTTTTCAGCTTCACTGGCTCTGCTATGCACTGGTCCGCGAGTCCGGGAAAGGCTGGAGTGGTGGCCGTATAAAAAACAAGCCAACAGTTACGCGACAGCATATGCTGCGTGGTGAAGG<br>CAGGTTACCATCTCCAGAGATGATTCAAAGGACACGGCGTATCTGAAATGAACAGCCTGAAAAGCGAGGACACGGCCGTATTACTGCACCAGACATCGATTCTGATGCGCAGCCTGGGGAGAAAATTGTTGACTCTGGGGCCAGGAAACCTGTACCCTCTC<br>CTCAGCCTCCACCAAGGCCCATCGTCTTCCCCCTGGCACCTCTCCAAGAGCACCTCTGGGGGCACAGCGCCCTGGCTGCTGTTCAAGGACTACTCCCCAACCGGTGACGGTGTCTGTGAAGTCAAGCGCCCTGACCAGCGCGTGCACACCTTCCGGCTGTCTA<br>CAGTCTCAGGA   |
| 232_I_GHV3-73_I_GHJ5 | AGGTCGTGGAGAGAGCTCCAGCCTTGGGATTTCCAGCTGTCTCACTCGGTGATCGGCACTGAATACAGAGACTCACCATGGAGCTTGGGCTGAGCTGGGTTTCTTGTGCTATTGTAAGAGTTGCCAGTGTGAGTGTGAGTGTGAGTCCGGGGGGGGCTTG<br>GTCCAGCCGGGGGGTCCCTGAACTCTCCTGTGCAGCCTCTGGTTTTCAGCTTCACTGGCTCCGCTATTCACTGGTCCGCGAGTCCGGGAAAGGCTGGAGTGGTGGCCGTATAAGAAACAAGCCAACAGTTACGCGACAGCATATGCTGCGTGGTGAAGGCA<br>GGTTACCATCTCCAGAGATGATTCAAAGGACACGGCGTATCTGAAATGAACAGCCTGAAAGCGAGGACACGGCCGTATTACTGCACCAGACATCGATTCTGATGCGCCAGCCTGGGGAGAAAATTGTTGACTCATGGGGCCAGGAAACCTGTACCCTCTCCT<br>TCAGCCTCCACCAAGGCCCATCGTCTTCCCCCTGGCACCTCTCCAAGAGCACCTCTGGGGGCACAGCGCCCTGGCTGCTGTTCAAGGACTACTCCCCAACCGGTGACGGTGTCTGTGAAGTCAAGCGCCCTGACCAGCGCGTGCACACCTTCCGGCTGTCTA<br>CAGTCTCAGGA |
| 232_I_GHV3-73_I_GHJ5 | AGGTCGTGGAGAGAGCTCCAGCCTTGGGATTTCCAGCTGTCTCACTCGGTGATCGGCACTGAATACAGAGACTCACCATGGAGCTTGGGCTGAGCTGGGTTTCTTGTGCTATTGTAAGAGTTGCCAGTGTGAGTGTGAGTGTGAGTCCGGGGGGAGGCTTG<br>GTCCAGCCTGGGGGGTCCCTGAACTCTCCTGTGCAGCCTCTGGTTTTCAGCTTCACTGGCTCCGCTATTCACTGGTCCGCGAGTCCGGGAAAGGCTGGAGTGGTGGCCGTATAAGAAACAAGCCAACAGTTACGCGACAGCATATGCTGCGTGGTGAAGGCA<br>GGTTACCATCTCCAGAGATGATTCAAAGGACACGGCGTATCTGAAATGAACAGCCTGAAAGCGAGGACACGGCCGTATTACTGCACCAGACATCGATTCTGATGCGCCAGCCTGGGGAGAAAATTGTTGACTCATGGGGCCAGGAAACCTGTACCCTCTCCT<br>AGCCTCCACCAAGGCCCATCGTCTTCCCCCTGGCACCTCTCCAAGAGCACCTCTGGGGGCACAGCGCCCTGGCTGCTGTTCAAGGACTACTCCCCAACCGGTGACGGTGTCTGTGAAGTCAAGCGCCCTGACCAGCGCGTGCACACCTTCCGGCTGTCTA<br>CAGTCTCAGGA |
| 232_I_GHV3-73_I_GHJ5 | AGCTCTGGAGAGAGCTCCAGCCTTGGGATTTCCAGCTGTCTCACTCGGTGATCGGCACTGAATACAGAGACTCACCATGGAGTTTGGGCTGAGCTGGGTTTCTTGTGCTATTGTAAGAGTTGCCAGTGTGAGTGTGAGTGTGAGTCCGGGGGAGGCTTG<br>GTCCAGCCGGGGGGTCCCTGAACTCTCCTGTGCAGCCTCTGGTTTTCAGCTTCACTGGCTCCGCTATTCACTGGTCCGCGAGTCCGGGAAAGGCTGGAGTGGTGGCCGTATAAGAAACAAGCCAACAGTTACGCGACAGCATATGCTGCGTGGTGAAGGCA<br>AGGTTACCATCTCCAGAGATGATTCAAAGGACACGGCGTATCTGAAATGAACAGCCTGAAAGCGAGGACACGGCCGTATTACTGCACCAGACATCGATTCTGATGCGCCAGCCTGGGGAGAAAATTGTTGACTCATGGGGCCAGGAAACCTGTACCCTCTCCT<br>CAGCCTCCACCAAGGCCCATCGTCTTCCCCCTGGCACCTCTCCAAGAGCACCTCTGGGGGCACAGCGCCCTGGCTGCTGTTCAAGGACTACTCCCCAACCGGTGACGGTGTCTGTGAAGTCAAGCGCCCTGACCAGCGCGTGCACACCTTCCGGCTGTCTA<br>CAGTCTCAGGA  |

232\_IHV3-73\_IHJ5

AGGTCTGGGAGAGGAGCTCCAGCCTTGGGATTCCAGCTGTCTCCACTCGGTGATCGGCACTGAATACAGGAGACTCACCATGGAGCTTGGGCTGAGCTGGGTTCCTTGTTGCTATTTAAAGGTGTCCAGTGTGAGGTGCAACTGGTGAGTCCGGGGGGGCTTG  
GTCCAGCCGGGGGGTCCCTGAAAGTCTCTGTGCAGCCTCTGGTTTCACTGCTCCGCTATTCACTGGGTCGCGCAGGCTTCCGGGAAAGCCCTGGAGTGGGTTGGCCGTATAAGAAACAAGCCAACAGTTACGCGACAGCATATGTCGTCGGTGAAGGC  
AGGTTCCACATCTCCAGAGATGATTCAAAGGACACGGCGTATCTGGAATGAACAGCCTGAAAAGCGAGGACACGGCCGTATTACTGCACCAGACATCGGATTCGTATGGCCGACCTTGGGGAGAAAAGTTGTTGACTCCTGGGGCCAGGGAACCTGGTCACCGTCTCC  
TCAGCCTCCACCAAGGGCCCATCGGTCTCCCTGCGACCCCTCTCAAGAGCACCTCTGGGGGCACAGCGGCCCTGGGCTGCTGTTCAAGGACTACTCCCGAACCGGTGACGGTGTGTTGAACTCAGGCGCCCTGACCAGCGGCGTGACACCTTCCGGCTGTCTTA  
CAGTCTCAGGA
